# Supplementary material for: Plasma metabolomics of autism spectrum disorder and influence of shared components in proband families
Source: PubMed Central journal article supplement — Exposome. 2021 Oct 7;1(1):osab004. doi: 10.1093/exposome/osab004 (PMC8739333; doi:10.1093/exposome/osab004), 2021-10-07
Supplement: osab004_supplementary_data.pdf [file osab004_supplementary_data.pdf]

# Supplementary Online Content

Plasma metabolomics of autism spectrum disorder and influence of shared components in proband families

Ming Kei Chung<sup>1</sup>, Matthew Ryan Smith<sup>2</sup>, Yufei Lin<sup>3</sup>, Douglas I. Walker<sup>4</sup>, Dean P. Jones<sup>2</sup>, Chirag J. Patel<sup>1,\*</sup>, Sek Won Kong<sup>3,5,\*</sup>

<sup>1</sup>Department of Biomedical Informatics, Harvard Medical School, Harvard University, 10 Shattuck Street, Boston, MA 02115, USA

<sup>2</sup>Clinical Biomarkers Laboratory, Division of Pulmonary Medicine, Department of Medicine, Emory University, Atlanta, GA 30322, USA

<sup>3</sup>Computational Health Informatics Program, Boston Children's Hospital, Boston, MA 02115, USA

<sup>4</sup>Department of Environmental Medicine and Public Health, Icahn School of Medicine at Mount Sinai, New York, NY 10029, USA

<sup>5</sup>Department of Pediatrics, Harvard Medical School, Harvard University, 10 Shattuck Street, Boston, MA 02115, USA

\*Corresponding authors:

Chirag J. Patel

Department of Biomedical Informatics, Harvard Medical School, Harvard University

10 Shattuck Street, Room 302, Boston, MA 02115

1-617-432-1195

E-mail: chirag\_patel@hms.harvard.edu

Sek Won Kong

Computational Health Informatics Program

Boston Children's Hospital, Boston, MA 02115

1-617-919-2689

E-mail: SekWon.Kong@childrens.harvard.edu

## Table of Contents

|                                                                                                                                        |    |
|----------------------------------------------------------------------------------------------------------------------------------------|----|
| METHODS S1. INCLUSION AND EXCLUSION CRITERIA FOR ASD, CONTROLS, PROBAND FAMILIES .....                                                 | 2  |
| METHODS S2. MEASUREMENT OF THE METABOLOME .....                                                                                        | 2  |
| METHODS S3. DATA ACQUISITION AND QAQC .....                                                                                            | 2  |
| METHODS S4. PATHWAY ENRICHMENT ANALYSIS .....                                                                                          | 3  |
| METHODS S5. CHEMICAL ANNOTATION .....                                                                                                  | 3  |
| TABLE S1. PUTATIVELY IDENTIFIED METABOLITES FROM THE METABOLOME-WIDE ASSOCIATION STUDY USING HILIC ANALYTICAL PLATFORM....             | 4  |
| TABLE S2. PUTATIVELY IDENTIFIED METABOLITES FROM THE METABOLOME-WIDE ASSOCIATION STUDY USING RPLC ANALYTICAL PLATFORM ....             | 4  |
| TABLE S3. SUMMARY OF LABELLED INTERNAL STANDARD CVs.....                                                                               | 4  |
| TABLE S4. SUMMARY OF THE PATHWAY ENRICHMENT ANALYSIS USING <i>MUMMICHOG</i> .....                                                      | 4  |
| TABLE S5. EXPOSURE AND FUNCTIONAL ANNOTATION OF THE PUTATIVELY IDENTIFIED METABOLITES FROM THE METABOLOME-WIDE ASSOCIATION STUDY ..... | 5  |
| FIGURE S1. PRINCIPAL COMPONENT ANALYSIS FOR ALL SAMPLES MEASURED USING HILIC AND RPLC .....                                            | 6  |
| FIGURE S2. DATA EXTRACTION QAQC METRICS .....                                                                                          | 7  |
| FIGURE S3. EMPIRICAL CUMULATIVE DISTRIBUTION OF THE COEFFICIENT OF VARIATION OF FEATURES IN QUALITY CONTROL SAMPLES.....               | 8  |
| FIGURE S4. VOLCANO PLOTS SHOWING THE ESTIMATES FROM METABOLOME-WIDE ASSOCIATION STUDY .....                                            | 9  |
| FIGURE S5. DENDROGRAMS OF THE HIERARCHICAL CLUSTERING OF THE MWAS SIGNIFICANT FEATURES .....                                           | 10 |
| REFERENCES.....                                                                                                                        | 12 |

This supplementary material has been provided by the authors to give readers additional information about their work.

## Methods S1. Inclusion and exclusion criteria for ASD, controls, proband families

We enrolled a total of 104 individuals (75 cases and 29 controls), who were part of a blood transcriptome study conducted at the Boston Children's Hospital to assess gene expression signature unique to ASD in years 2007–2012.

Inclusion criteria for the ASD group were a clinical diagnosis of ASD by Diagnostic and Statistical Manual of Mental Disorders, Fourth Edition, Text Revision and age of 24 months or older. All patients with ASD were assessed with the Autism Diagnostic Observation Schedule (ADOS) and the Autism Diagnostic Interview-Revised (ADI-R). We excluded individuals with known genetic causes of ASD such as fragile X syndrome, tuberous sclerosis, Landau-Kleffner syndrome, and Klinefelter syndrome. We documented a broad range of phenotypes, such as ASD diagnoses, clinical test records, and allergy history. All individuals in the control group had no abnormal lab test results and did not have any chronic disease, intellectual disability, ASD, or other neurological disorders.

In our family-based analysis, there were 25 trios (parents with one ASD proband), 4 quartets (parents with two ASD probands), 4 father/mother-ASD pairs, 10 families with only father/mother/father and mother, and 38 families with only ASD cases. There were 31 families meeting the minimum requirements for the shared environment analysis (i.e., with at least one ASD proband and at least one parent).

## Methods S2. Measurement of the metabolome

Briefly, 50  $\mu$ L aliquots of plasma were mixed with acetonitrile containing 14 stable isotope internal standards at a 2:1 ratio to precipitate proteins. Samples were then equilibrated on ice for 30 minutes and centrifuged for 10 minutes at 13 400 rpm at 4°C. The supernatant was transferred to autosampler vials and kept in a refrigerated autosampler until untargeted metabolic profiling. Each extract was analyzed in triplicate using a dual column chromatography scheme that includes hydrophilic interaction liquid chromatography (HILIC; XBridge BEH Amide XP HILIC column; Waters, Waltham, MA, 50x2.1mm, 2.5 $\mu$ m) and reversed phase liquid chromatography (RPLC; C18 column; Higgins Analytical, Mountain View, CA, 50x2.1mm, 2.6  $\mu$ m). The chromatography was coupled with HRMS in positive (HILIC) and negative electrospray ionization (ESI) modes (RPLC) that enabled an increased coverage of the plasma metabolome. Mass spectral data was collected with a 5-minute mobile phase gradient on a Thermo Q-Exactive HF high-resolution mass spectrometer (Thermo Fisher, San Diego, CA) set to collect data from mass-to-charge ratio ( $m/z$ ) of 85 to 1,275 at a resolution of 120,000. Data were collected on a mobile phase gradient over a 5-minute period. Analyte separation for HILIC was performed with a gradient elution with mobile phases A: LCMS grade water, B: LCMS grade acetonitrile, C: 2% formic acid. The initial 1.5 min period consisted of 22.5% A, 75% B, and 2.5% C, followed by a linear increase to 75% A, 22.5% B, and 2.5% C at 4 min and a final hold of 1 min. C18 chromatography was performed on an end capped C18 column with mobile phases A: water, B: acetonitrile, C: 10 mM ammonium acetate. The initial 1 min period consisted of 60% A, 35% B, and 5% C followed by a linear increase to 0% A, 95% B, and 5% C at 3 min and held for the remaining 2 min. For both methods, the mobile phase flow rate was 0.35 mL/min for the first min and increased to 0.4 mL/min for the final 4 min. Tune parameters for sheath gas were 45 for ESI+ and 30 for ESI-. Auxiliary gas was set at 25 for ESI+ and 5 for ESI-. Spray voltage was set at 3.5 kV for ESI+ and -3.0 kV for ESI-.

## Methods S3. Data acquisition and QAQC

Prior to analysis, probands, controls and parental samples were randomized into 5 batches. Samples were analyzed in triplicate in batches of 40 study samples, with each batch including 6 separate analyses of two different QAQC samples. The QAQC samples (identified as QSTD\_plasma and CHEAR\_plasma) were designed to include a wide distribution of donor ages, sex and races to be as representative as possible. To verify the quality of the untargeted metabolomics data, QA/QC is completed using the pooled reference samples, labeled internal standards and triplicate analysis for each sample. For all samples, labeled internal standards ([<sup>13</sup>C<sub>6</sub>]-D-glucose, [<sup>15</sup>N,<sup>13</sup>C<sub>5</sub>]-L-methionine, [<sup>13</sup>C<sub>5</sub>]-L-glutamic acid, [<sup>15</sup>N]-L-tyrosine, [3,3-<sup>13</sup>C<sub>2</sub>]-cystine, [trimethyl-<sup>13</sup>C<sub>3</sub>]-caffeine and [<sup>13</sup>C<sub>5</sub>, <sup>15</sup>N<sub>2</sub>]-L-glutamine) were added at levels reflecting normal physiological concentrations. Data is qualified using a five-step procedure that includes record keeping for study information (name, PI information, date samples received, number of samples, number of batches, length, internal study ID, species, matrix, preservative, freeze/thaws prior to arrival), sample preparation record keeping (technician, time samples were removed from storage, sample preparation workflow, pooled sample batch, internal standards, number of QC samples), chromatographic QA/QC (method information, solvents, run length, column and identifier information, injection volume, evaluation of representative peak extracted ion chromatograms, retention time and deviation); mass spectrometry QA/QC (instrument name, tune file, polarity and resolution, coefficient of variation (CV) for metabolites in pooled QAQC samples and internal standards, median CV for all metabolites); and overall study QA/QC (PCA clustering to evaluate batch effects and outliers, distribution of the sum of feature intensity across all samples and batch).

QA/QC analysis is completed daily for each batch using an automated workflow and is verified by at least two different individuals. Final study QAQC is completed upon completion of all sample analyses. Batches not meeting acceptance criteria are discarded and re-analyzed (if applicable). Post-instrument acquisition, data extraction and alignment contain additional levels of QA/QC. Using xMSAnalyzer, replicate injections are first tested for correlation coefficient, samples with  $r < 0.7$  and  $p$ -value  $> 0.05$  are discarded. Feature median triplicate RSD, peak score, number of non-detects, samples with detected values in two of three injections and Q-score (a combination of RSD and non-detected values) are also evaluated for the finalized data.

A summary of key QAQC metrics is provided. PCA was performed to evaluate potential differences in QAQC pooled samples and study samples (Figure S1A-B), batch effects (Figure S1C-D) and any global differences among parental, control and proband samples (Figure 1E-F). Although PCA suggest global differences between QAQC and study samples, this can be expected since the population and collection protocols may have differed from those used to collect study samples. No differences among batches or sample types were observed. Summary statistics for both analytical modes, including triplicate CVs, average peak intensity ranges, and number of missing values are provided in Figure S2A-B. Triplicate CVs for HILIC and RPLC were 30.2% and 28.6%, respectively, while average peak intensities ranged over 7 orders of magnitude and the majority of features were detected in >50% of samples. To assess inter-sample variation, we used pooled QC samples, CHEAR\_plasma, for variation assessment because it has the closest matrix effects to the actual samples. We selected a total of 30 pooled QC measurements and removed features that contained > 80% zero intensity. We estimated the CVs for each of the log<sub>2</sub> transformed features because most of the features were right-skewed. Features in the highest 20% of the CVs were considered low quality and were excluded from further downstream analysis. The median CVs were 27.3% (HILIC) and 3.9% (RPLC) (Figure S3). Analytical variation was further evaluated by determining internal standard CVs across all samples, as well as within parental, control and proband groups (Table S3). The average CV for all sample groups was 7.9%, with the majority under 10%. Average CV for [3,3-<sup>13</sup>C<sub>2</sub>]-cystine was the only standard with an average CV >20%.

#### **Methods S4. Pathway enrichment analysis**

To discover the perturbed molecular pathways in ASD, we ran Mummichog (a web version through [www.metaboanalyst.ca](http://www.metaboanalyst.ca)) with the accurate masses of all features, the *P* values and *Z* scores from MWAS as input. We used FDR equivalent *P* value as the cut off threshold and matched with the pathways in the Homo sapiens library (KEGG Oct 29, 2019 version). Significant pathway enrichment was determined through the gamma *P* value.

We show the ASD-associated molecular pathways in Table S4. We found 31 enriched pathways (RPLC: 19) and only listed 10 of them (RPLC: 5) that had a marginal *P* value of < 0.1. Glutathione (GSH) is a tripeptide antioxidant to protect damages caused by reactive oxygen species such as free radicals and various kinds of peroxides<sup>1</sup>. Catalyzed by GSH peroxidase, GSH reacts oxidative species and reduced glutathione disulfide (GSSG). The recycling of GSSG back to GSH is catalyzed by GSH reductase. This is a continuous process and the ratio of GSH/GSSG in an organism can be used as a measure of oxidative stress<sup>2</sup>. Meta-analysis of GSH peroxidase in red blood cells had concluded that reduction of its activities is associated with ASD<sup>3</sup>, which is in line with the dysregulation of glutathione metabolism found. It is not clear the causes of reduced function of GSH enzyme but could be related to genetic polymorphisms in glutaredoxin and cystathionine gamma-lyase genes<sup>4</sup> and selenium deficiency in diet because GSH peroxidase is a selenium dependent enzyme<sup>5</sup>.

#### **Methods S5. Chemical annotation**

For each of the putatively identified chemicals, we further annotated their source, generation activity, route of exposure, and biological functions. We synthesized the annotations through querying the HMDB, PubChem, KEGG, Chemical Entities of Biological Interest, and the Comparative Toxicogenomics Database.

Further annotation regarding the sources and roles of the putatively identified chemicals is shown in Table S5. For the HILIC data, we found that over half of the identified (12/21) could have a man-made origin, such as pharmaceuticals and pesticides. Fourteen percent of them (3/21) were the compounds participated in human metabolic pathways and 24% of them (5/21) were natural chemicals found in food. For RPLC data, all of them have an exogenous origin. Half of the chemicals (5/10) were pharmaceuticals and 20% (2/10) were dietary chemicals.

**Table S1. Putatively identified metabolites from the metabolome-wide association study using HILIC analytical platform**

Please see the end of the Supplementary Information.

**Table S2. Putatively identified metabolites from the metabolome-wide association study using RPLC analytical platform**

Please see the end of the Supplementary Information.

**Table S3. Summary of labelled internal standard CVs**

| Internal Standard                                               | All samples | Probands | Controls | Father | Mother |
|-----------------------------------------------------------------|-------------|----------|----------|--------|--------|
| [trimethyl- <sup>13</sup> C <sub>3</sub> ]-caffeine             | 1.8%        | 1.8%     | 1.4%     | 1.4%   | 1.7%   |
| [ <sup>15</sup> N, <sup>13</sup> C <sub>5</sub> ]-L-methionine  | 6.7%        | 2.3%     | 19.4%    | 2.2%   | 2.6%   |
| [ <sup>13</sup> C <sub>5</sub> ]-L-glutamic acid                | 3.9%        | 3.7%     | 4.7%     | 3.3%   | 5.1%   |
| [ <sup>13</sup> C <sub>5</sub> , 15N <sub>2</sub> ]-L-glutamine | 14.3%       | 11.4%    | 2.9%     | 15.6%  | 16.0%  |
| [3,3- <sup>13</sup> C <sub>2</sub> ]-cystine                    | 22.4%       | 16.3%    | 19.5%    | 27.6%  | 23.1%  |
| [ <sup>15</sup> N]-L-tyrosine                                   | 6.7%        | 2.2%     | 19.3%    | 1.9%   | 2.2%   |
| [ <sup>13</sup> C <sub>6</sub> ]-D-glucose,                     | 2.4%        | 2.2%     | 3.0%     | 1.9%   | 2.5%   |

**Table S4. Summary of the pathway enrichment analysis using *Mummichog***

| Platform | Pathway                                     | Total metabolites in pathway | No. of significant metabolites | Gamma <i>p</i> value |
|----------|---------------------------------------------|------------------------------|--------------------------------|----------------------|
| HILIC    | Glutathione metabolism                      | 28                           | 5                              | 0.048                |
|          | Lysine degradation                          | 25                           | 4                              | 0.051                |
|          | Aminoacyl-tRNA biosynthesis                 | 48                           | 5                              | 0.053                |
|          | Alanine, aspartate and glutamate metabolism | 28                           | 4                              | 0.061                |
|          | D-Glutamine and D-glutamate metabolism      | 6                            | 2                              | 0.063                |
|          | Arachidonic acid metabolism                 | 36                           | 3                              | 0.072                |
|          | Valine, leucine and isoleucine biosynthesis | 8                            | 2                              | 0.075                |
|          | Valine, leucine and isoleucine degradation  | 40                           | 3                              | 0.077                |
|          | Arginine and proline metabolism             | 38                           | 3                              | 0.077                |
|          | Pyrimidine metabolism                       | 39                           | 4                              | 0.082                |
| RP       | Caffeine metabolism                         | 10                           | 2                              | 0.070                |
|          | Fatty acid biosynthesis                     | 47                           | 2                              | 0.072                |
|          | Amino sugar and nucleotide sugar metabolism | 37                           | 3                              | 0.075                |
|          | Fructose and mannose metabolism             | 20                           | 2                              | 0.080                |
|          | Steroid hormone biosynthesis                | 85                           | 3                              | 0.097                |

Only pathways with gamma *P* value < 0.1 are shown.

HILIC: Hydrophilic interaction liquid chromatography.

RP: Reversed phase liquid chromatography.

**Table S5. Exposure and functional annotation of the putatively identified metabolites from the metabolome-wide association study**

| Platform                                           | Name                                                             | Source                                                        | Process <sup>a</sup> | Route of exposure  | Role                                                     |                                                          |
|----------------------------------------------------|------------------------------------------------------------------|---------------------------------------------------------------|----------------------|--------------------|----------------------------------------------------------|----------------------------------------------------------|
| HILIC                                              | Lamivudine-triphosphate                                          | Endogenous                                                    | Biological           | NA                 | Drug metabolite; waste product                           |                                                          |
|                                                    | Nornitrogen mustard                                              | Endogenous                                                    | Biological           | NA                 | Drug metabolite; waste product                           |                                                          |
|                                                    | 4R-Hydroxy solifenacin                                           | Endogenous                                                    | Biological           | NA                 | Drug metabolite; waste product                           |                                                          |
|                                                    | desbutyl-lumefantrine                                            | Endogenous                                                    | Biological           | NA                 | Drug metabolite; waste product                           |                                                          |
|                                                    | Thiodiacetic acid                                                | Endogenous                                                    | Biological           | NA                 | Drug metabolite; waste product                           |                                                          |
|                                                    | 2-Oxo-3-hydroxy-4-phosphobutanoic acid                           | Endogenous                                                    | Biological           | NA                 | Participated in host metabolic pathway                   |                                                          |
|                                                    | O-Phosphotyrosine                                                | Endogenous                                                    | Biological           | NA                 | Participated in host metabolic pathway                   |                                                          |
|                                                    | 2-Oxophytanate;2-Oxophytanic acid                                | Endogenous                                                    | Biological           | NA                 | Participated in host metabolic pathway                   |                                                          |
|                                                    | N-Methylpelletierine                                             | Exogenous                                                     | Agricultural         | Ingestion          | Dietary molecule; participated in host metabolic pathway |                                                          |
|                                                    | Piperidine                                                       | Exogenous                                                     | Agricultural         | Ingestion          | Dietary molecule                                         |                                                          |
|                                                    | Apigenin 7-sulfate                                               | Exogenous                                                     | Agricultural         | Ingestion          | Dietary molecule                                         |                                                          |
|                                                    | N-(14-Methylhexadecanoyl)pyrrolidine                             | Exogenous                                                     | Agricultural         | Ingestion          | Dietary molecule                                         |                                                          |
|                                                    | Toxoflavine                                                      | Exogenous                                                     | Biological           | Ingestion, contact | Bacterial toxin                                          |                                                          |
|                                                    | Tulobuterol                                                      | Exogenous                                                     | Biological           | Contact            | Pharmaceuticals                                          |                                                          |
|                                                    | 5-Hydroxy-734-trimethoxy-8-methylisoflavone 5-O-neohesperidoside | Exogenous                                                     | Biological           | Ingestion          | Dietary molecule; participated in host metabolic pathway |                                                          |
|                                                    | Octylamine;N-Octylamine;Monooctylamine                           | Exogenous                                                     | Industrial           | Ingestion, contact | Lubricants and greases; industrial intermediate          |                                                          |
|                                                    | Carbophenothion                                                  | Exogenous                                                     | Industrial           | Ingestion, contact | Pesticide                                                |                                                          |
|                                                    | Silver sulfadiazine                                              | Exogenous                                                     | Industrial           | Ingestion          | Pharmaceuticals                                          |                                                          |
|                                                    | 3beta-Hydroxylanostane-711-dione acetate                         | Exogenous                                                     | Industrial           | Ingestion          | Pharmaceuticals                                          |                                                          |
|                                                    | Saccharin sodium anhydrous                                       | Exogenous                                                     | Industrial           | Ingestion          | Sweetening Agents                                        |                                                          |
|                                                    | 2-(2-Chloro-phenyl)-5-(5-methylthiophen-2-yl)-134oxadiazole      | NA                                                            | NA                   | NA                 | NA                                                       |                                                          |
|                                                    | RP                                                               | (3b6b8a12a)-812-Epoxy-7(11)-eremophilene-6812-trimethoxy-3-ol | Exogenous            | Agricultural       | Ingestion                                                | Dietary molecule                                         |
|                                                    |                                                                  | Visnagin                                                      | Exogenous            | Agricultural       | Ingestion                                                | Pharmaceuticals                                          |
|                                                    |                                                                  | Oseltamivir phosphate                                         | Exogenous            | Biological         | Ingestion                                                | Pharmaceuticals                                          |
|                                                    |                                                                  | Captopril                                                     | Exogenous            | Biological         | Ingestion                                                | Pharmaceuticals                                          |
|                                                    |                                                                  | 8-Hydroxyalanylclavam                                         | Exogenous            | Biological         | Ingestion                                                | Pharmaceuticals (related to biosynthesis of antibiotics) |
| N-(Ethoxycarbonyl)methyl)-p-menthane-3-carboxamide |                                                                  | Exogenous                                                     | Biological           | Ingestion          | Food additive                                            |                                                          |
| Zeranol                                            |                                                                  | Exogenous                                                     | Agricultural         | Ingestion          | Growth promoter for food animals                         |                                                          |
| Oleandolide                                        |                                                                  | Exogenous                                                     | Biological           | Ingestion          | Pharmaceuticals (related to biosynthesis of antibiotics) |                                                          |
| Floionolic acid                                    |                                                                  | Exogenous                                                     | Agricultural         | Ingestion          | Dietary molecule                                         |                                                          |
| 1-Dodecanoyl-sn-glycerol                           |                                                                  | NA                                                            | NA                   | NA                 | NA                                                       |                                                          |

NA: Not available.

HILIC: Hydrophilic interaction liquid chromatography.

RP: Reversed phase liquid chromatography.

<sup>a</sup> The main activity source associated with the metabolite.

**Figure S1. Principal component analysis for all samples measured using HILIC and RPLC**

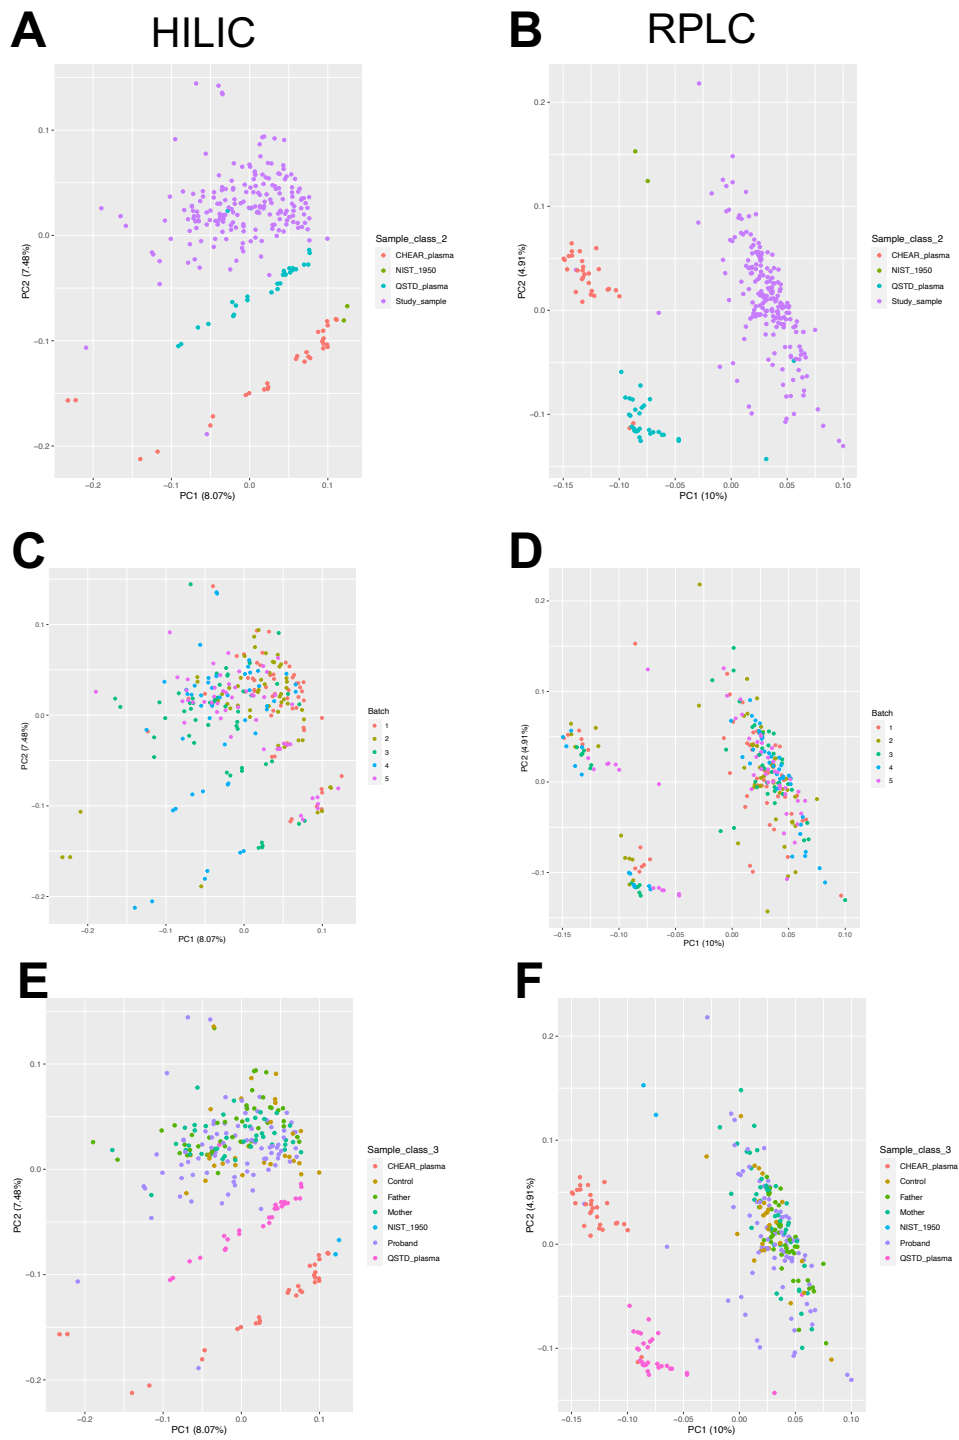

Score plots were colored based upon A-B) QAQC or study samples; C-D) Batch number; E-F) Sample case.

**Figure S2. Data extraction QAQC metrics**

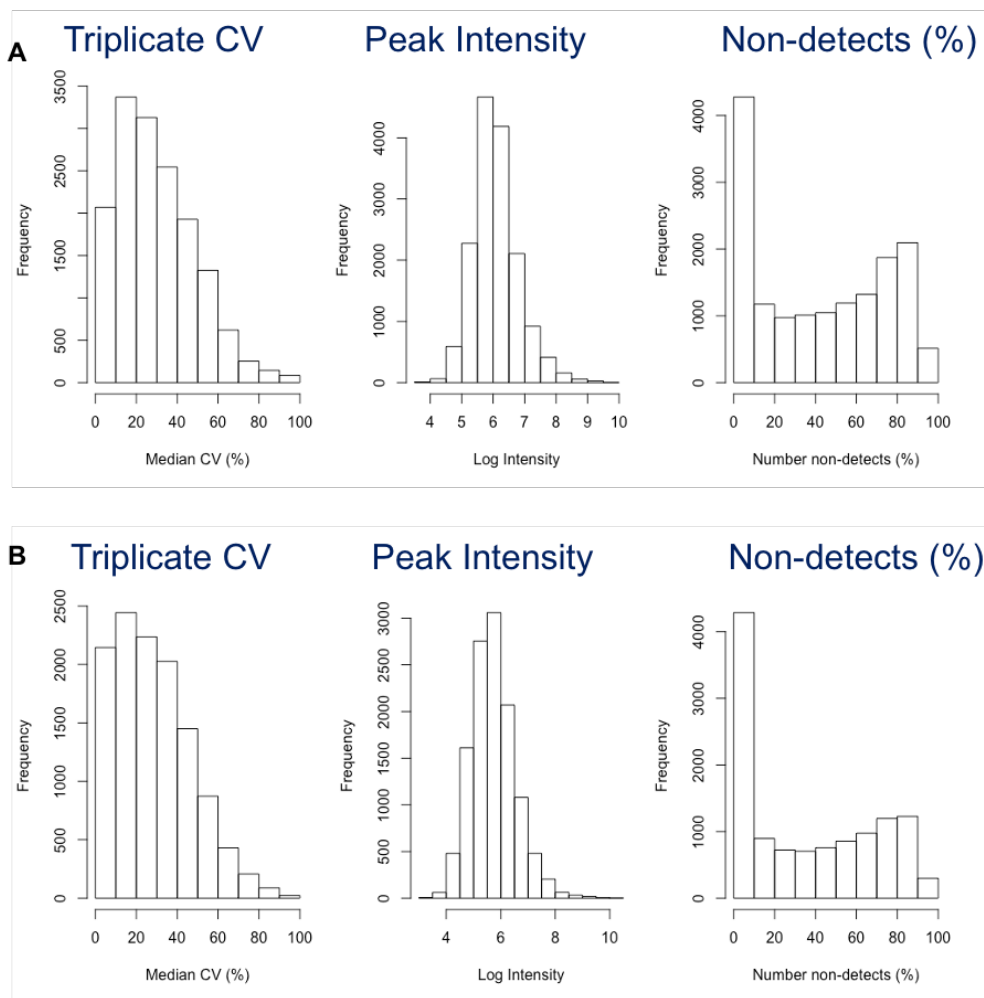

A) HILIC and B) RPLC

**Figure S3. Empirical cumulative distribution of the coefficient of variation of features in quality control samples**

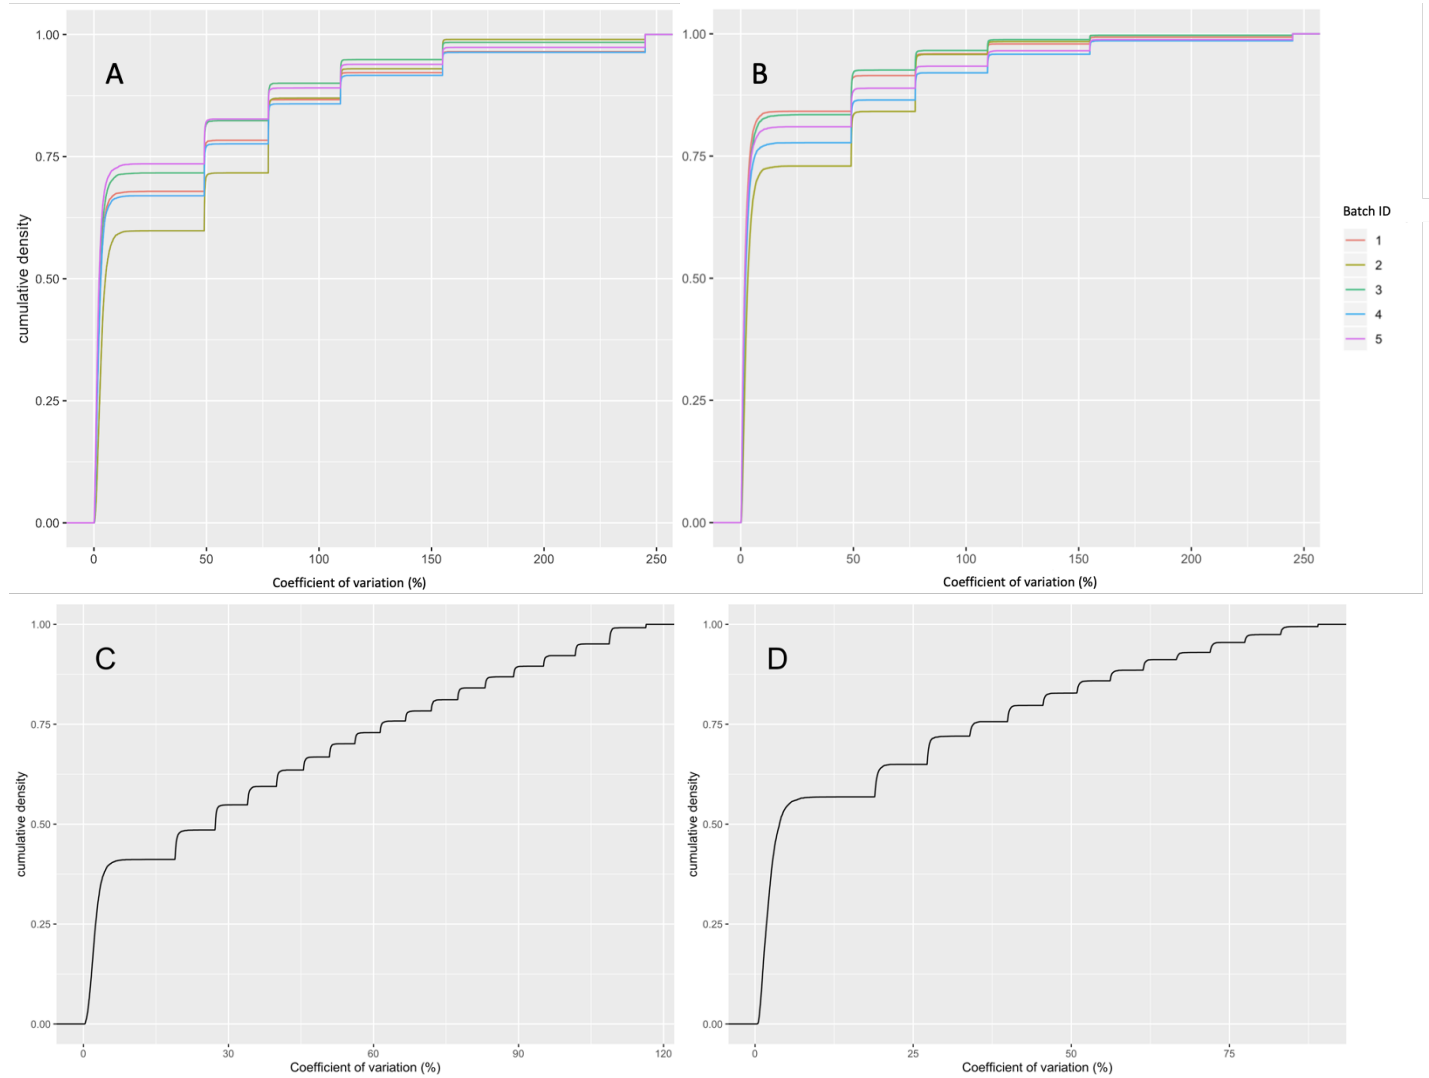

**Figure S1. Empirical cumulative distribution of the coefficient of variation of the features found in quality control samples. A & B) Analytical batch 1 to 5 are shown. Each batch contains 6 QC measurements. C&D) Batches are combined and CV is estimated with 30 QC measurements. A & C) HILIC platform. B & D) RPLC platform.**



**Figure S4. Volcano plots showing the estimates from metabolome-wide association study**

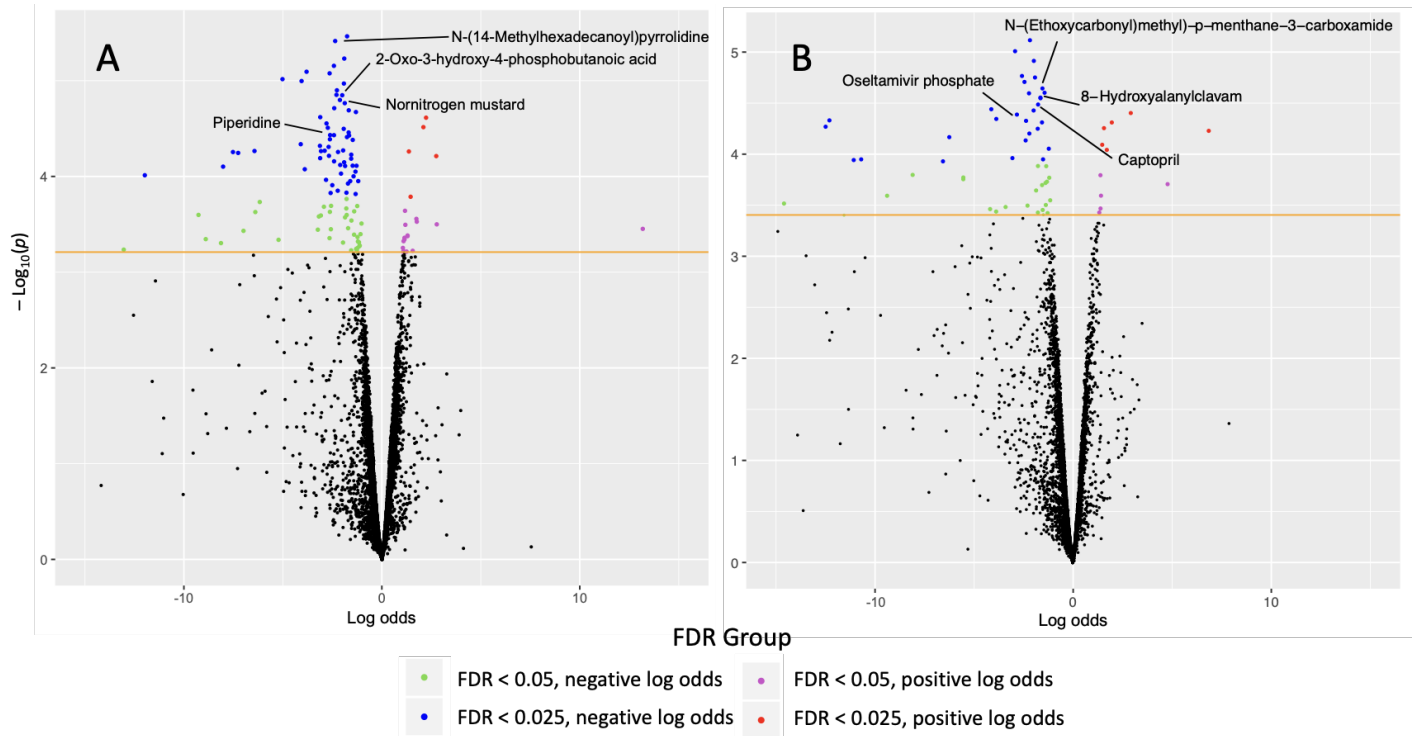

Figure S4. Volcano plots showing the estimates from metabolome-wide association study. A) hydrophilic interaction liquid chromatography platform; B) reversed phase chromatography platform. Minus  $\log_{10}$  of the p values are shown on the vertical axis, and log odds of autism spectrum disorder (per two fold increase of the feature intensity, scaled to have unit variance for comparisons) are shown on the horizontal axis. X axis is restricted to show a numerical range between -15 to 15. Orange horizontal line denotes a false discovery rate (FDR) threshold at 0.05. FDR significant features are colored into 4 groups as shown in the legend. Four putatively identified features with lowest p values were labeled.

**Figure S5. Dendrograms of the hierarchical clustering of the MWAS significant features**

HILIC:

Cluster Dendrogram

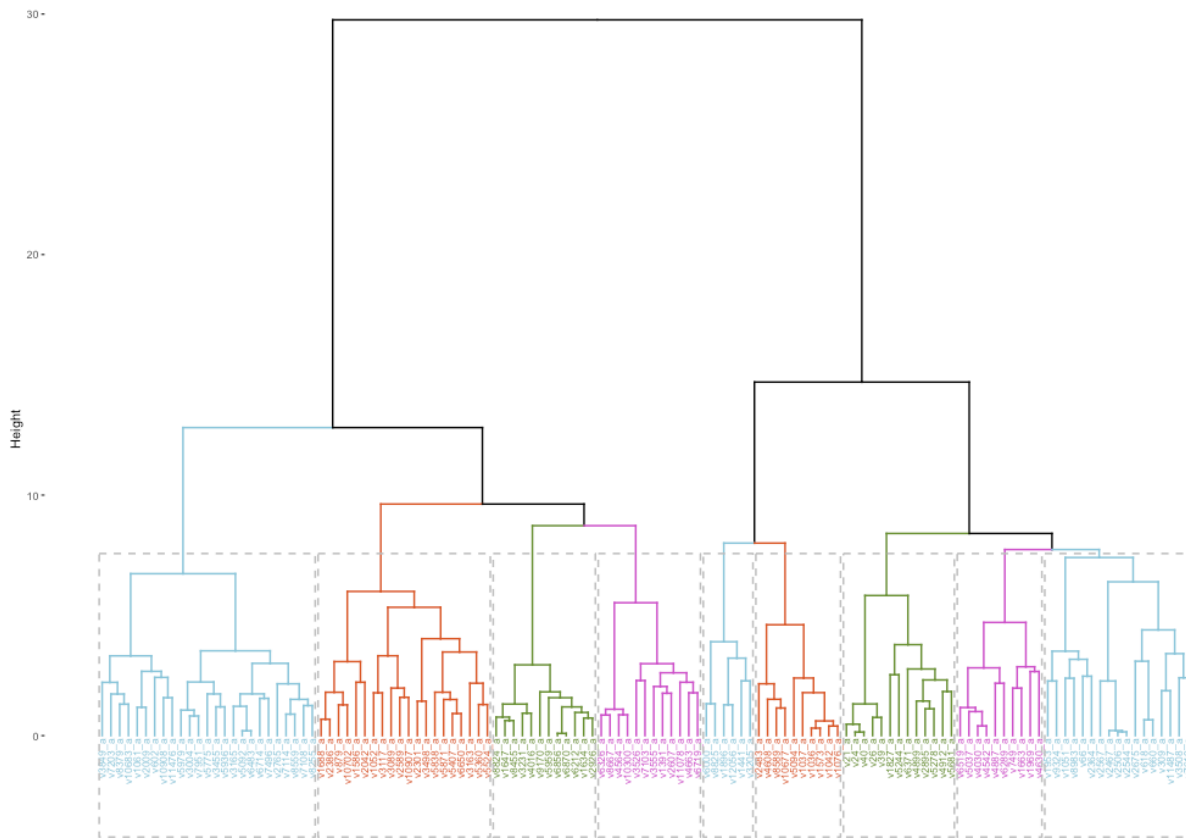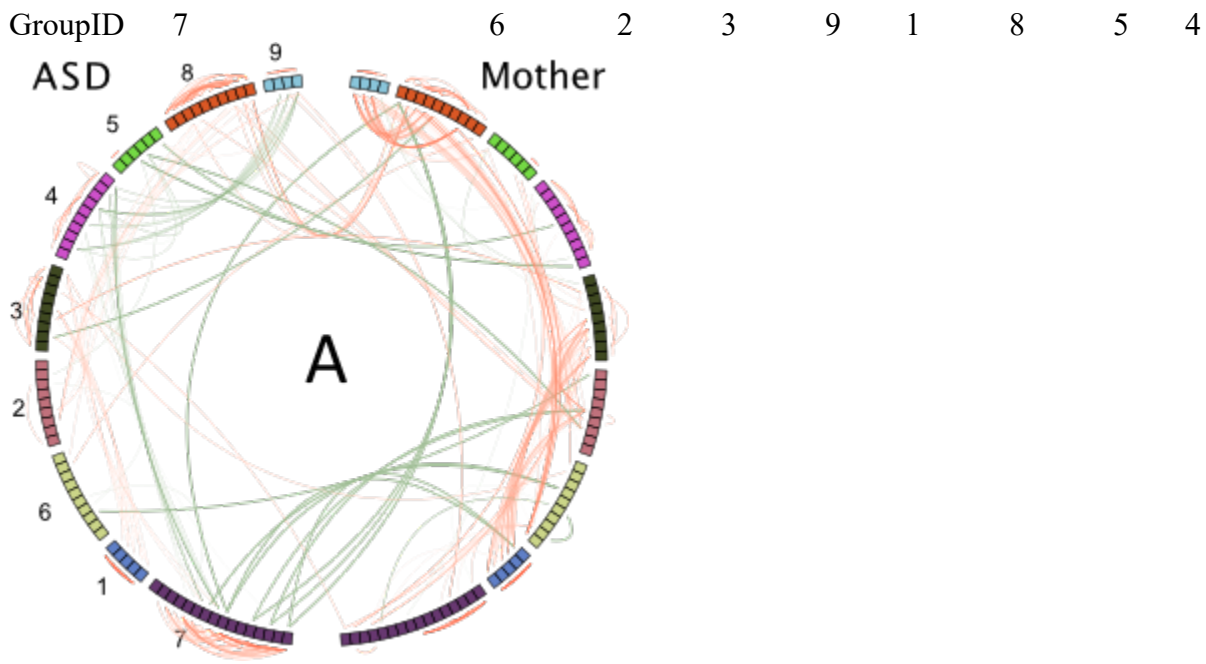

# RPLC

Cluster Dendrogram

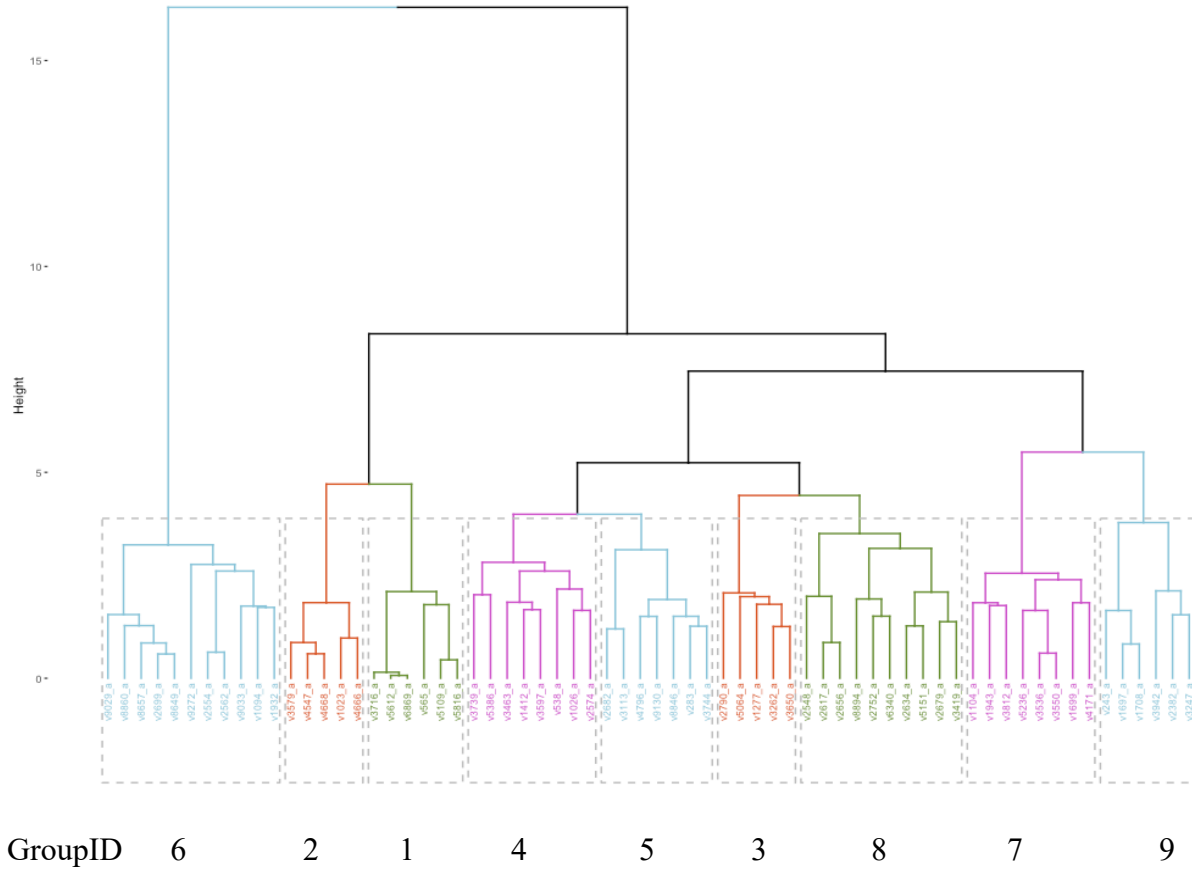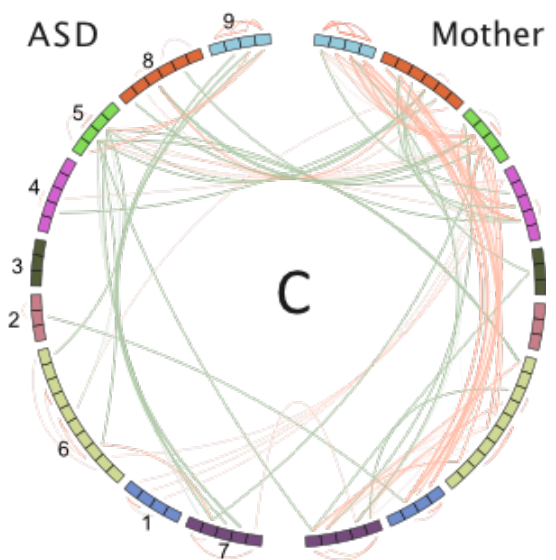

Figure S5. Dendrograms of the hierarchical clustering of the MWA significant features of the comparison between ASD cases and controls (HILIC: 125; RPLC: 66). We used Euclidean distance as the metric for closeness and arbitrarily set to create 9 feature groups to aid pattern inspection in Figure 3. The Y axis denotes the closeness, and the X axis shows the internal IDs of the features. We only show the features that were detected both in ASD and their parents in Figure 3 (i.e., on the circular tract), therefore the number of features in Figure 3 is smaller than the features shown in the dendrograms. We labelled the corresponding groups in dendrograms and correlation globes for easier comparison.

## References

1. Pompella, A., Visvikis, A., Paolicchi, A., Tata, V. D. & Casini, A. F. The changing faces of glutathione, a cellular protagonist. *Biochem. Pharmacol.* **66**, 1499–1503 (2003).
2. Pastore, A. *et al.* Determination of Blood Total, Reduced, and Oxidized Glutathione in Pediatric Subjects. *Clin. Chem.* **47**, 1467–1469 (2001).
3. Frustaci, A. *et al.* Oxidative stress-related biomarkers in autism: systematic review and meta-analyses. *Free Radic. Biol. Med.* **52**, 2128–2141 (2012).
4. Bowers, K. *et al.* Glutathione pathway gene variation and risk of autism spectrum disorders. *J. Neurodev. Disord.* **3**, 132–143 (2011).
5. Lakshmi Priya, M. D. & Geetha, A. Level of trace elements (copper, zinc, magnesium and selenium) and toxic elements (lead and mercury) in the hair and nail of children with autism. *Biol. Trace Elem. Res.* **142**, 148–158 (2011).

Table S1. Putatively identified metabolites from the metabolome-wide association study of autism cases and controls using HILIC analytical platform. Both uniquely and multiply matched annotations are shown.

| mzid  | Monoisotopic |          | OR         |          | OR        |          | p value  | q value | dbID                                                                                                                                                                                                                                                                          | Name |
|-------|--------------|----------|------------|----------|-----------|----------|----------|---------|-------------------------------------------------------------------------------------------------------------------------------------------------------------------------------------------------------------------------------------------------------------------------------|------|
|       | Mass         | Time (s) | Odds ratio | lower CI | higher CI |          |          |         |                                                                                                                                                                                                                                                                               |      |
| v2364 | 174.1004     | 66.4     | 530763.5   | 2022.41  | 8.3E+09   | 0.000353 | 0.038789 | C00437  | N-Acetylornithine;N2-Acetyl-L-ornithine                                                                                                                                                                                                                                       |      |
| v2042 | 163.0494     | 122.8    | 0          | 0        | 0.001     | 9.72E-05 | 0.017272 | C00715  | Pterin;2-Amino-4-oxopteridine;2-Amino-4-hydroxypteridine                                                                                                                                                                                                                      |      |
| v6212 | 336.2301     | 28.4     | 0.32       | 0.157    | 0.583     | 0.000536 | 0.04761  | C00959  | Prostaglandin B1;PGB1                                                                                                                                                                                                                                                         |      |
| v1969 | 160.0848     | 70.8     | 9.335      | 3.821    | 31.837    | 2.43E-05 | 0.012975 | C00993  | D-Alanyl-D-alanine;D-Ala-D-Ala                                                                                                                                                                                                                                                |      |
| v2364 | 174.1004     | 66.4     | 530763.5   | 2022.41  | 8.3E+09   | 0.000353 | 0.038789 | C01047  | N5-Ethyl-L-glutamine;L-Theanine                                                                                                                                                                                                                                               |      |
| v5278 | 292.2038     | 24.6     | 0          | 0        | 0.01      | 7.90E-05 | 0.015103 | C01226  | 12-OPDA;(15Z)-12-Oxophyto-1015-dienoate;(15Z)-12-Oxophyto-1015-dienoic acid;9(S)13(S)-12-Oxo-PDA;12-Oxo-1015(Z)-phytodienoic acid                                                                                                                                             |      |
| v1051 | 129.1518     | 28       | 0.001      | 0        | 0.027     | 0.00037  | 0.039469 | C01740  | Octylamine;N-Octylamine;Monoctylamine                                                                                                                                                                                                                                         |      |
| v24   | 85.0891      | 44.2     | 0.061      | 0.013    | 0.188     | 2.80E-05 | 0.014011 | C01746  | Piperidine;Azacyclohexane;Hexahydropyridine                                                                                                                                                                                                                                   |      |
| v1036 | 129.0426     | 81.1     | 3.281      | 1.802    | 6.691     | 0.00032  | 0.036032 | C01877  | 4-Oxoproline;4-Oxo-L-proline                                                                                                                                                                                                                                                  |      |
| v1036 | 129.0426     | 81.1     | 3.281      | 1.802    | 6.691     | 0.00032  | 0.036032 | C01879  | Pidolic acid;5-Oxoproline;Pyroglutamic acid;5-Pyrrolidone-2-carboxylic acid;Pyroglutamate;5-Oxo-L-proline;L-Pyroglutamic acid;L-5-Pyrrolidone-2-carboxylic acid                                                                                                               |      |
| v6000 | 326.2821     | 25.5     | 4.275      | 2.164    | 10.106    | 0.000163 | 0.024299 | C02117  | 2-Oxophytanate;2-Oxophytanic acid                                                                                                                                                                                                                                             |      |
| v6212 | 336.2301     | 28.4     | 0.32       | 0.157    | 0.583     | 0.000536 | 0.04761  | C02165  | Leukotriene B4;(6Z8E10E14Z)-(5S12R)-512-Dihydroxyeicosa-681014-tetraenoate;(6Z8E10E14Z)-(5S12R)-512-Dihydroxyeicosa-681014-tetraenoate;LTB4                                                                                                                                   |      |
| v1036 | 129.0426     | 81.1     | 3.281      | 1.802    | 6.691     | 0.00032  | 0.036032 | C02237  | 5-Oxo-D-proline;D-Pyroglutamic acid;D-5-Pyrrolidone-2-carboxylic acid                                                                                                                                                                                                         |      |
| v2042 | 163.0481     | 122.8    | 0          | 0        | 0.001     | 9.72E-05 | 0.017272 | C03066  | 3-Hydroxy-L-glutamate;3-Hydroxy-L-glutamic acid                                                                                                                                                                                                                               |      |
| v2042 | 163.0481     | 122.8    | 0          | 0        | 0.001     | 9.72E-05 | 0.017272 | C03079  | 4-Hydroxy-L-glutamate;4-Hydroxy-L-glutamic acid                                                                                                                                                                                                                               |      |
| v1969 | 160.0848     | 70.8     | 9.335      | 3.821    | 31.837    | 2.43E-05 | 0.012975 | C03153  | N5-Methyl-L-glutamine                                                                                                                                                                                                                                                         |      |
| v1036 | 129.0426     | 81.1     | 3.281      | 1.802    | 6.691     | 0.00032  | 0.036032 | C04281  | L-1-Pyrroline-3-hydroxy-5-carboxylate;3-Hydroxy-L-1-pyrroline-5-carboxylate;(3R5S)-1-Pyrroline-3-hydroxy-5-carboxylate                                                                                                                                                        |      |
| v1036 | 129.0426     | 81.1     | 3.281      | 1.802    | 6.691     | 0.00032  | 0.036032 | C04282  | 1-Pyrroline-4-hydroxy-2-carboxylate                                                                                                                                                                                                                                           |      |
| v5278 | 292.2038     | 24.6     | 0          | 0        | 0.01      | 7.90E-05 | 0.015103 | C04672  | (9Z15Z)-(13S)-1213-Epoxyoctadeca-91115-trienoic acid;(9Z15Z)-(13S)-1213-Epoxyoctadeca-91115-trienoate;(9Z)-(13S)-1213-Epoxyoctadeca-91115-trienoate;1213(S)-EOT;1213(S)-EOTrE                                                                                                 |      |
| v6212 | 336.2301     | 28.4     | 0.32       | 0.157    | 0.583     | 0.000536 | 0.04761  | C04685  | (13E)-(15S)-15-Hydroxy-9-oxoprostanoic acid;Prostaglandin A1;PGA1                                                                                                                                                                                                             |      |
| v6212 | 336.2301     | 28.4     | 0.32       | 0.157    | 0.583     | 0.000536 | 0.04761  | C04686  | (13E)-(15S)-15-Hydroxy-9-oxoprostanoic acid;Prostaglandin C1                                                                                                                                                                                                                  |      |
| v5681 | 310.2144     | 24.1     | 0.001      | 0        | 0.014     | 5.68E-05 | 0.014039 | C04785  | 13(S)-HPOT;(9Z11E15Z)-(13S)-Hydroperoxyoctadeca-91115-trienoate;(9Z11E15Z)-(13S)-13-Hydroperoxyoctadeca-91115-trienoic acid;13(S)-HpOTrE;13-HPOT                                                                                                                              |      |
| v6212 | 336.2301     | 28.4     | 0.32       | 0.157    | 0.583     | 0.000536 | 0.04761  | C04822  | 8(R)-HPETE;(5Z9E11Z14Z)-(8R)-8-Hydroperoxyeicosa-591114-tetraenoate;(5Z9E11Z14Z)-(8R)-8-Hydroperoxyeicosa-591114-tetraenoate                                                                                                                                                  |      |
| v6212 | 336.2301     | 28.4     | 0.32       | 0.157    | 0.583     | 0.000536 | 0.04761  | C04849  | (5Z9E14Z)-(8xi11R12S)-1112-Epoxy-8-hydroxyeicosa-5914-trienoic acid;(5Z9E14Z)-(8xi11R12S)-1112-Epoxy-8-hydroxyeicosa-5914-trienoate;Hepoxilin A3                                                                                                                              |      |
| v6212 | 336.2301     | 28.4     | 0.32       | 0.157    | 0.583     | 0.000536 | 0.04761  | C05356  | 5(S)-HPETE;5(S)-Hydroperoxy-6-trans-81114-cis-eicosatetraenoic acid;(6E8Z11Z14Z)-(5S)-5-Hydroperoxyeicosa-681114-tetraenoate;(6E8Z11Z14Z)-(5S)-5-Hydroperoxyeicosa-681114-tetraenoic acid;(5S6E8Z11Z14Z)-5-Hydroperoxyeicosa-681114-tetraenoate                               |      |
| v2042 | 163.0481     | 122.8    | 0          | 0        | 0.001     | 9.72E-05 | 0.017272 | C05947  | L-erythro-4-Hydroxyglutamate                                                                                                                                                                                                                                                  |      |
| v6212 | 336.2301     | 28.4     | 0.32       | 0.157    | 0.583     | 0.000536 | 0.04761  | C05965  | 12(S)-HPETE;(5Z8Z10E14Z)-(12S)-12-Hydroperoxyeicosa-581014-tetraenoic acid;(5Z8Z10E14Z)-(12S)-12-Hydroperoxyeicosa-581014-tetraenoate;12-Hydroperoxyeicosatetraenoate;12-Hydroperoxyeicosatetraenoic acid;12-Hydroperoxyeicosatetraenoic acid                                 |      |
| v6212 | 336.2301     | 28.4     | 0.32       | 0.157    | 0.583     | 0.000536 | 0.04761  | C05966  | 15(S)-HPETE;(5Z8Z11Z13E)-(15S)-15-Hydroperoxyeicosa-581113-tetraenoic acid;15-Hydroperoxyeicosatetraenoate;15-Hydroperoxyeicosatetraenoate;15-Hydroperoxyeicosatetraenoic acid;15-Hydroperoxyeicosatetraenoic acid;(5Z8Z11Z13E)-(15S)-15-Hydroperoxyeicosa-581113-tetraenoate |      |
| v3455 | 213.9879     | 275.6    | 0.101      | 0.03     | 0.245     | 1.41E-05 | 0.011973 | C06054  | 2-Oxo-3-hydroxy-4-phosphobutanoate;alpha-Keto-3-hydroxy-4-phosphobutyrate;(3R)-3-Hydroxy-2-oxo-4-phosphonoxybutanoate                                                                                                                                                         |      |
| v6483 | 348.1937     | 29.3     | 0.278      | 0.138    | 0.502     | 7.74E-05 | 0.015103 | C06094  | Gibberellin A53                                                                                                                                                                                                                                                               |      |

|       |          |       |       |       |        |          |          |        |                                                                                                                                                                                               |
|-------|----------|-------|-------|-------|--------|----------|----------|--------|-----------------------------------------------------------------------------------------------------------------------------------------------------------------------------------------------|
| v1827 | 155.131  | 25.8  | 0.001 | 0     | 0.014  | 5.56E-05 | 0.014039 | C06184 | N-Methylpelletierine                                                                                                                                                                          |
| v3004 | 195.9773 | 275.1 | 0.122 | 0.035 | 0.297  | 7.58E-05 | 0.015103 | C06367 | 1-Carboxyvinyl carboxyphosphonate;Carboxyphosphonoenolpyruvate                                                                                                                                |
| v1969 | 160.0848 | 70.8  | 9.335 | 3.821 | 31.837 | 2.43E-05 | 0.012975 | C06442 | N(gamma)-Acetyldiaminobutyrate;N4-Acetyl-L-24-diaminobutyrate;N4-Acetyl-L-24-diaminobutanoate                                                                                                 |
| v4564 | 261.0402 | 69.3  | 0.167 | 0.059 | 0.385  | 0.000148 | 0.022851 | C06501 | Phosphotyrosine;Phosphomtyrosine                                                                                                                                                              |
| v618  | 113.0841 | 32.3  | 0.042 | 0.005 | 0.165  | 0.000262 | 0.031993 | C06593 | epsilon-Caprolactam                                                                                                                                                                           |
| v3165 | 202.0954 | 78.8  | 0.142 | 0.047 | 0.325  | 5.35E-05 | 0.014039 | C06658 | Proclavaminic acid;Proclavamate                                                                                                                                                               |
| v3163 | 202.0742 | 57.9  | 0.141 | 0.038 | 0.368  | 0.000491 | 0.044784 | C06732 | alphanbeta-Didehydrotryptophan                                                                                                                                                                |
| v5681 | 310.2144 | 24.1  | 0.001 | 0     | 0.014  | 5.68E-05 | 0.014039 | C07357 | (9Z12Z15Z)-(7S8S)-Dihydroxyoctadeca-91215-trienoic acid;(9Z12Z15Z)-(7S8S)-Dihydroxyoctadeca-91215-trienoate                                                                                   |
| v3165 | 202.0954 | 78.8  | 0.142 | 0.047 | 0.325  | 5.35E-05 | 0.014039 | C08271 | Coprine;N(5)-(1-Hydroxycyclopropyl)-L-glutamine                                                                                                                                               |
| v5278 | 292.2038 | 24.6  | 0     | 0     | 0.01   | 7.90E-05 | 0.015103 | C08319 | alpha-Licanic acid;(9Z11E13E)-4-Oxo-octadeca-91113-trienoic acid;4-Oxo-91113-octadecatrienoic acid;                                                                                           |
| v2675 | 184.1463 | 271.8 | 3.666 | 1.89  | 8.141  | 0.000414 | 0.042781 | C08571 | 4-Oxo-cis-9trans-11trans-13-octadecatrienoic acid                                                                                                                                             |
| v6212 | 336.2301 | 28.4  | 0.32  | 0.157 | 0.583  | 0.000536 | 0.04761  | C09087 | gamma-Undecalactone;2(3H)-Furanone 5-heptyldihydro-                                                                                                                                           |
| v6483 | 348.1937 | 29.3  | 0.278 | 0.138 | 0.502  | 7.74E-05 | 0.015103 | C09112 | Diterpenoid SP-II                                                                                                                                                                             |
| v6212 | 336.2301 | 28.4  | 0.32  | 0.157 | 0.583  | 0.000536 | 0.04761  | C09175 | Ingenol                                                                                                                                                                                       |
| v2895 | 192.115  | 23.6  | 0.169 | 0.057 | 0.395  | 0.000253 | 0.031596 | C09909 | Portulal                                                                                                                                                                                      |
| v3163 | 202.0742 | 57.9  | 0.141 | 0.038 | 0.368  | 0.000491 | 0.044784 | C10744 | Thymyl acetate                                                                                                                                                                                |
| v1969 | 160.0848 | 70.8  | 9.335 | 3.821 | 31.837 | 2.43E-05 | 0.012975 | C10996 | Vasicinone                                                                                                                                                                                    |
| v4887 | 276.0124 | 71.5  | 0.239 | 0.107 | 0.463  | 9.97E-05 | 0.017412 | C11570 | Daminozide                                                                                                                                                                                    |
| v6483 | 348.1937 | 29.3  | 0.278 | 0.138 | 0.502  | 7.74E-05 | 0.015103 | C11858 | 2-(2-Chloro-phenyl)-5-(5-methylthiophen-2-yl)-13-oxadiazole                                                                                                                                   |
| v6483 | 348.1937 | 29.3  | 0.278 | 0.138 | 0.502  | 7.74E-05 | 0.015103 | C11860 | Gibberellin A14                                                                                                                                                                               |
| v3231 | 204.981  | 275   | 0.264 | 0.126 | 0.488  | 8.91E-05 | 0.016408 | C12284 | Gibberellin A15 open lactone                                                                                                                                                                  |
| v2675 | 184.1463 | 271.8 | 3.666 | 1.89  | 8.141  | 0.000414 | 0.042781 | C12295 | Saccharin sodium anhydrous                                                                                                                                                                    |
| v4608 | 263.0844 | 93.3  | 2.894 | 1.664 | 5.726  | 0.000558 | 0.049106 | C12798 | Citronellyl formate                                                                                                                                                                           |
| v5278 | 292.2038 | 24.6  | 0     | 0     | 0.01   | 7.90E-05 | 0.015103 | C13816 | Tulobuterol hydrochloride                                                                                                                                                                     |
| v2675 | 184.1463 | 271.8 | 3.666 | 1.89  | 8.141  | 0.000414 | 0.042781 | C13823 | (9R13R)-12-Oxo-phytodienoic acid;(9R13R)-12-Oxo-phyto-10Z15Z-dienoic acid;(10Z15Z)-(9R13R)-12-Oxophyto-1015-dienoic acid                                                                      |
| v2675 | 184.1463 | 271.8 | 3.666 | 1.89  | 8.141  | 0.000414 | 0.042781 | C13910 | 11-Undecanolactone                                                                                                                                                                            |
| v3455 | 213.9871 | 275.6 | 0.101 | 0.03  | 0.245  | 1.41E-05 | 0.011973 | C14181 | Undecylenic acid;Undecenoic acid                                                                                                                                                              |
| v6212 | 336.2301 | 28.4  | 0.32  | 0.157 | 0.583  | 0.000536 | 0.04761  | C14781 | 2-Benzothiazolesulfonamide                                                                                                                                                                    |
| v6212 | 336.2301 | 28.4  | 0.32  | 0.157 | 0.583  | 0.000536 | 0.04761  | C14808 | 15H-1112-EETA;15-Hydroxy-1112-epoxyeicosatrienoic acid;(5Z8Z13E)-(15S)-1112-Epoxy-15-hydroxyeicosa-5813-trienoic acid;(5Z8Z13E)-(15S)-1112-Epoxy-15-hydroxyeicosa-5813-trienoic acid          |
| v6212 | 336.2301 | 28.4  | 0.32  | 0.157 | 0.583  | 0.000536 | 0.04761  | C14810 | Hepoxilin A3;(5Z9E14Z)-(11S12S)-1112-Epoxy-8-hydroxyeicosa-5914-trienoic acid;(5Z9E14Z)-(11S12S)-1112-Epoxy-8-hydroxyeicosa-5914-trienoic acid                                                |
| v6212 | 336.2301 | 28.4  | 0.32  | 0.157 | 0.583  | 0.000536 | 0.04761  | C14812 | Hepoxilin B3;(5Z8Z14Z)-(11S12S)-1112-Epoxy-10-hydroxyeicosa-5814-trienoic acid;(5Z8Z14Z)-(11S12S)-1112-Epoxy-10-hydroxyeicosa-5814-trienoic acid                                              |
| v6212 | 336.2301 | 28.4  | 0.32  | 0.157 | 0.583  | 0.000536 | 0.04761  | C14813 | 12(R)-HPETE;(5Z8Z10E14Z)-(12R)-12-Hydroperoxyeicosa-581014-tetraenoic acid;(5Z8Z10E14Z)-(12R)-12-Hydroperoxyeicosa-581014-tetraenoic acid                                                     |
| v6212 | 336.2301 | 28.4  | 0.32  | 0.157 | 0.583  | 0.000536 | 0.04761  | C14820 | 11H-1415-EETA;11-Hydroxy-1415-EETA;11-Hydroxy-1415-epoxyeicosatrienoic acid;(5Z8Z12E)-1415-Epoxy-11-hydroxyeicosa-5812-trienoic acid;(5Z8Z12E)-1415-Epoxy-11-hydroxyeicosa-5812-trienoic acid |
| v6212 | 336.2301 | 28.4  | 0.32  | 0.157 | 0.583  | 0.000536 | 0.04761  | C14821 | 11(R)-HPETE;(5Z8Z12E14Z)-(11R)-Hydroperoxyeicosa-581214-tetraenoic acid;(5Z8Z12E14Z)-(11R)-Hydroperoxyeicosa-581214-tetraenoic acid                                                           |
| v6212 | 336.2301 | 28.4  | 0.32  | 0.157 | 0.583  | 0.000536 | 0.04761  | C14823 | 9(S)-HPETE;(5Z7E11Z14Z)-(9S)-9-Hydroperoxyeicosa-571114-tetraenoic acid;(5Z7E11Z14Z)-(9S)-9-Hydroperoxyeicosa-571114-tetraenoic acid                                                          |
| v1663 | 149.9987 | 260.7 | 0.005 | 0     | 0.074  | 0.000459 | 0.043897 | C14872 | 8(S)-HPETE;(5Z9E11Z14Z)-(8S)-8-Hydroperoxyeicosa-591114-tetraenoic acid;(5Z9E11Z14Z)-(8S)-8-Hydroperoxyeicosa-591114-tetraenoic acid                                                          |
| v5278 | 292.2038 | 24.6  | 0     | 0     | 0.01   | 7.90E-05 | 0.015103 | C14911 | Thiodiacetic acid                                                                                                                                                                             |
| v7108 | 378.1962 | 69.6  | 0.304 | 0.157 | 0.535  | 0.000112 | 0.018593 | C14923 | 17beta-Hydroxy-2-oxa-5alpha-androstan-3-one                                                                                                                                                   |
| v8983 | 500.3866 | 27.5  | 3.144 | 1.735 | 6.367  | 0.000437 | 0.043363 | C15379 | 12alpha-(Chloromethyl)-12-hydroxy-pregn-4-ene-320-dione                                                                                                                                       |
| v5681 | 310.2144 | 24.1  | 0.001 | 0     | 0.014  | 5.68E-05 | 0.014039 | C15753 | 3beta-Hydroxylanostane-711-dione acetate                                                                                                                                                      |
|       |          |       |       |       |        |          |          |        | Dihydroalboycline                                                                                                                                                                             |

|       |             |       |          |         |         |          |          |           |                                                                                                                                            |
|-------|-------------|-------|----------|---------|---------|----------|----------|-----------|--------------------------------------------------------------------------------------------------------------------------------------------|
| v4899 | 276.2089    | 25.1  | 0.075    | 0.015   | 0.229   | 0.000149 | 0.022851 | C16300    | Stearidonic acid;691215-Octadecatetraenoic acid;(6Z9Z12Z15Z)-Octadecatetraenoic acid                                                       |
| v5278 | 292.2038    | 24.6  | 0        | 0       | 0.01    | 7.90E-05 | 0.015103 | C16319    | Etherolenic acid;(9Z11E1E3Z)-12-(13-Hexadienyloxy)-911-dodecadienoic acid                                                                  |
| v5278 | 292.2038    | 24.6  | 0        | 0       | 0.01    | 7.90E-05 | 0.015103 | C16320    | Colnelenic acid;(8E)-9-(1E3Z6Z)-Nona-136-trien-1-yloxy-non-8-enoate                                                                        |
| v5681 | 310.2144    | 24.1  | 0.001    | 0       | 0.014   | 5.68E-05 | 0.014039 | C16321    | 9(S)-HPOT;(10E12Z15Z)-(9S)-9-Hydroperoxyoctadeca-101215-trienoic acid;9(S)-HpOTrE;<br>(9S10E12Z15Z)-9-Hydroperoxy-101215-octadecatrienoate |
| v5278 | 292.2038    | 24.6  | 0        | 0       | 0.01    | 7.90E-05 | 0.015103 | C16324    | 910-EOT;910-Epoxyoctadecatrienoic acid;(9S)-(10E12Z15Z)-910-Epoxyoctadecatri-101215-enoic acid;                                            |
| v5278 | 292.2038    | 24.6  | 0        | 0       | 0.01    | 7.90E-05 | 0.015103 | C16325    | 910-EOTrE                                                                                                                                  |
| v5681 | 310.2144    | 24.1  | 0.001    | 0       | 0.014   | 5.68E-05 | 0.014039 | C16341    | 10-OPDA;10-Oxo-1115-phytydienoic acid;(11Z15Z)-10-Oxo-1115-phytydienoic acid                                                               |
| v1391 | 141.0112    | 273.6 | 0.12     | 0.039   | 0.281   | 1.59E-05 | 0.012388 | C16552    | 2(R)-HPOT;(2R)-(9Z12Z15Z)-2-Hydroperoxyoctadecatri-91215-enoic acid;2(R)-HpOTrE                                                            |
| v2926 | 193.06      | 115   | 0.127    | 0.037   | 0.309   | 9.34E-05 | 0.016906 | C16789    | Nornitrogen mustard                                                                                                                        |
| v2895 | 192.115     | 23.6  | 0.169    | 0.057   | 0.395   | 0.000253 | 0.031596 | C17853    | Toxoflavine                                                                                                                                |
| v2895 | 192.115     | 23.6  | 0.169    | 0.057   | 0.395   | 0.000253 | 0.031596 | C17875    | Senkyunolide                                                                                                                               |
| v3004 | 195.9773    | 275.1 | 0.122    | 0.035   | 0.297   | 7.58E-05 | 0.015103 | C17946    | Sedanonic acid lactone                                                                                                                     |
| v6326 | 341.9739    | 70.7  | 0.191    | 0.078   | 0.388   | 3.73E-05 | 0.014011 | C18968    | Carboxyphosphonopyruvate                                                                                                                   |
| v4899 | 276.2089    | 25.1  | 0.075    | 0.015   | 0.229   | 0.000149 | 0.022851 | C19042    | Carbophenothion                                                                                                                            |
| v2675 | 184.1463    | 271.8 | 3.666    | 1.89    | 8.141   | 0.000414 | 0.042781 | C19420    | Kinoprene                                                                                                                                  |
| v1969 | 160.0848    | 70.8  | 9.335    | 3.821   | 31.837  | 2.43E-05 | 0.012975 | C19929    | 2-Ethylhexyl acrylate                                                                                                                      |
| v5681 | 310.2144    | 24.1  | 0.001    | 0       | 0.014   | 5.68E-05 | 0.014039 | C19936    | N-alpha-Acetyl-L-24-diaminobutyrate                                                                                                        |
| v5681 | 310.2144    | 24.1  | 0.001    | 0       | 0.014   | 5.68E-05 | 0.014039 | C20704    | (9R10E12Z15Z)-9-Hydroperoxyoctadeca-101215-trienoate                                                                                       |
| v24   | 85.0891     | 44.2  | 0.061    | 0.013   | 0.188   | 2.80E-05 | 0.014011 | C20809    | (8E10S12Z15Z)-10-Hydroperoxyoctadeca-81215-trienoate                                                                                       |
| v3163 | 202.0742    | 57.9  | 0.141    | 0.038   | 0.368   | 0.000491 | 0.044784 | C21124    | (R)-2-Methylpyrrolidine                                                                                                                    |
| v1036 | 129.0425931 | 81.1  | 3.281    | 1.802   | 6.691   | 0.00032  | 0.036032 | HMDB00267 | IPA imine;2-Imino-3-(indol-3-yl)propanoate                                                                                                 |
| v4630 | 264.0303734 | 57.9  | 0.166    | 0.056   | 0.385   | 0.000216 | 0.029572 | HMDB00559 | Pyroglutamic acid                                                                                                                          |
| v2301 | 172.0847923 | 70.4  | 0        | 0       | 0.01    | 0.000497 | 0.044933 | HMDB00721 | 3-Methoxy-4-hydroxyphenylethyleneglycol sulfate                                                                                            |
| v2042 | 163.0494098 | 122.8 | 0        | 0       | 0.001   | 9.72E-05 | 0.017272 | HMDB00802 | Glycylproline                                                                                                                              |
| v1036 | 129.0425931 | 81.1  | 3.281    | 1.802   | 6.691   | 0.00032  | 0.036032 | HMDB00805 | Pterin                                                                                                                                     |
| v6212 | 336.2300595 | 28.4  | 0.32     | 0.157   | 0.583   | 0.000536 | 0.04761  | HMDB01085 | Pyrrolidonecarboxylic acid                                                                                                                 |
| v6212 | 336.2300595 | 28.4  | 0.32     | 0.157   | 0.583   | 0.000536 | 0.04761  | HMDB01193 | Leukotriene B4                                                                                                                             |
| v1036 | 129.0425931 | 81.1  | 3.281    | 1.802   | 6.691   | 0.00032  | 0.036032 | HMDB01369 | 5(S)-Hydroperoxyeicosatetraenoic acid                                                                                                      |
| v1036 | 129.0425931 | 81.1  | 3.281    | 1.802   | 6.691   | 0.00032  | 0.036032 | HMDB01843 | Pyrroline hydroxycarboxylic acid                                                                                                           |
| v1036 | 129.0425931 | 81.1  | 3.281    | 1.802   | 6.691   | 0.00032  | 0.036032 | HMDB02234 | N-Acrylylglycine                                                                                                                           |
| v6212 | 336.2300595 | 28.4  | 0.32     | 0.157   | 0.583   | 0.000536 | 0.04761  | HMDB02236 | 1-Pyrroline-4-hydroxy-2-carboxylate                                                                                                        |
| v6212 | 336.2300595 | 28.4  | 0.32     | 0.157   | 0.583   | 0.000536 | 0.04761  | HMDB02656 | 8-iso-PGA1                                                                                                                                 |
| v4899 | 276.2089301 | 25.1  | 0.075    | 0.015   | 0.229   | 0.000149 | 0.022851 | HMDB02697 | Prostaglandin A1                                                                                                                           |
| v6212 | 336.2300595 | 28.4  | 0.32     | 0.157   | 0.583   | 0.000536 | 0.04761  | HMDB02982 | 19-Norandrosterone                                                                                                                         |
| v4630 | 264.0303734 | 57.9  | 0.166    | 0.056   | 0.385   | 0.000216 | 0.029572 | HMDB03332 | Prostaglandin B1                                                                                                                           |
| v2364 | 174.1004423 | 66.4  | 530763.5 | 2022.41 | 8.3E+09 | 0.000353 | 0.038789 | HMDB03357 | 3-Methoxy-4-Hydroxyphenylglycol sulfate                                                                                                    |
| v1969 | 160.0847923 | 70.8  | 9.335    | 3.821   | 31.837  | 2.43E-05 | 0.012975 | HMDB03459 | N-Acetylorithine                                                                                                                           |
| v6212 | 336.2300595 | 28.4  | 0.32     | 0.157   | 0.583   | 0.000536 | 0.04761  | HMDB04243 | D-Alanyl-D-alanine                                                                                                                         |
| v6212 | 336.2300595 | 28.4  | 0.32     | 0.157   | 0.583   | 0.000536 | 0.04761  | HMDB04244 | 12(S)-HPETE                                                                                                                                |
| v4899 | 276.2089301 | 25.1  | 0.075    | 0.015   | 0.229   | 0.000149 | 0.022851 | HMDB04590 | 15(S)-HPETE                                                                                                                                |
| v6212 | 336.2300595 | 28.4  | 0.32     | 0.157   | 0.583   | 0.000536 | 0.04761  | HMDB04688 | 19-Nor-5-androstenediol                                                                                                                    |
| v6212 | 336.2300595 | 28.4  | 0.32     | 0.157   | 0.583   | 0.000536 | 0.04761  | HMDB04690 | Hepoxilin A3                                                                                                                               |
| v6212 | 336.2300595 | 28.4  | 0.32     | 0.157   | 0.583   | 0.000536 | 0.04761  | HMDB04692 | Hepoxilin B3                                                                                                                               |
| v6212 | 336.2300595 | 28.4  | 0.32     | 0.157   | 0.583   | 0.000536 | 0.04761  | HMDB04693 | 12(R)-HPETE                                                                                                                                |
| v6212 | 336.2300595 | 28.4  | 0.32     | 0.157   | 0.583   | 0.000536 | 0.04761  | HMDB04696 | 11H-1415-EETA                                                                                                                              |
| v6212 | 336.2300595 | 28.4  | 0.32     | 0.157   | 0.583   | 0.000536 | 0.04761  | HMDB04699 | 11(R)-HPETE                                                                                                                                |
| v6212 | 336.2300595 | 28.4  | 0.32     | 0.157   | 0.583   | 0.000536 | 0.04761  | HMDB05050 | 8(S)-HPETE                                                                                                                                 |
| v6212 | 336.2300595 | 28.4  | 0.32     | 0.157   | 0.583   | 0.000536 | 0.04761  | HMDB05087 | 15H-1112-EETA                                                                                                                              |
| v6212 | 336.2300595 | 28.4  | 0.32     | 0.157   | 0.583   | 0.000536 | 0.04761  | HMDB05088 | 6-trans-Leukotriene B4                                                                                                                     |
| v6212 | 336.2300595 | 28.4  | 0.32     | 0.157   | 0.583   | 0.000536 | 0.04761  | HMDB05089 | 6-trans-12-epi-Leukotriene B4                                                                                                              |
| v4899 | 276.2089301 | 25.1  | 0.075    | 0.015   | 0.229   | 0.000149 | 0.022851 | HMDB05886 | 12(S)-Leukotriene B4                                                                                                                       |
| v4564 | 261.0402236 | 69.3  | 0.167    | 0.059   | 0.385   | 0.000148 | 0.022851 | HMDB06049 | 19-Noretiocholanolone                                                                                                                      |
|       |             |       |          |         |         |          |          |           | O-Phosphotyrosine                                                                                                                          |

|        |             |       |          |         |         |          |          |           |                                                                |
|--------|-------------|-------|----------|---------|---------|----------|----------|-----------|----------------------------------------------------------------|
| v4899  | 276.2089301 | 25.1  | 0.075    | 0.015   | 0.229   | 0.000149 | 0.022851 | HMDB06547 | Stearidonic acid                                               |
| v3455  | 213.9878537 | 275.6 | 0.101    | 0.03    | 0.245   | 1.41E-05 | 0.011973 | HMDB06801 | 2-Oxo-3-hydroxy-4-phosphobutanoic acid                         |
| v6212  | 336.2300595 | 28.4  | 0.32     | 0.157   | 0.583   | 0.000536 | 0.04761  | HMDB10204 | 1415-DiHETE                                                    |
| v6212  | 336.2300595 | 28.4  | 0.32     | 0.157   | 0.583   | 0.000536 | 0.04761  | HMDB10211 | 1718-DiHETE                                                    |
| v6212  | 336.2300595 | 28.4  | 0.32     | 0.157   | 0.583   | 0.000536 | 0.04761  | HMDB10216 | 515-DiHETE                                                     |
| v6212  | 336.2300595 | 28.4  | 0.32     | 0.157   | 0.583   | 0.000536 | 0.04761  | HMDB10219 | 815-DiHETE                                                     |
| v6212  | 336.2300595 | 28.4  | 0.32     | 0.157   | 0.583   | 0.000536 | 0.04761  | HMDB11135 | 5-HPETE                                                        |
| v2301  | 172.0847923 | 70.4  | 0        | 0       | 0.01    | 0.000497 | 0.044933 | HMDB11178 | L-prolyl-L-glycine                                             |
| v6212  | 336.2300595 | 28.4  | 0.32     | 0.157   | 0.583   | 0.000536 | 0.04761  | HMDB12498 | 1011-dihydro-12-oxo-LTB4                                       |
| v6212  | 336.2300595 | 28.4  | 0.32     | 0.157   | 0.583   | 0.000536 | 0.04761  | HMDB12839 | 67-dihydro-5-oxo-12-epi-LTB4                                   |
| v5681  | 310.2144094 | 24.1  | 0.001    | 0       | 0.014   | 5.68E-05 | 0.014039 | HMDB13623 | 12(13)Ep-9-KODE                                                |
| v6650  | 355.9497143 | 72.8  | 0.314    | 0.154   | 0.577   | 0.000487 | 0.044784 | HMDB15610 | Silver sulfadiazine                                            |
| v1969  | 160.0847923 | 70.8  | 9.335    | 3.821   | 31.837  | 2.43E-05 | 0.012975 | HMDB28680 | Alanyl-Alanine                                                 |
| v3165  | 202.0953569 | 78.8  | 0.142    | 0.047   | 0.325   | 5.35E-05 | 0.014039 | HMDB28688 | Alanyl-Hydroxyproline                                          |
| v2364  | 174.1004423 | 66.4  | 530763.5 | 2022.41 | 8.3E+09 | 0.000353 | 0.038789 | HMDB28854 | Glycyl-Valine                                                  |
| v3165  | 202.0953569 | 78.8  | 0.142    | 0.047   | 0.325   | 5.35E-05 | 0.014039 | HMDB28856 | Hydroxypropyl-Alanine                                          |
| v3165  | 202.0953569 | 78.8  | 0.142    | 0.047   | 0.325   | 5.35E-05 | 0.014039 | HMDB29026 | Prolyl-Serine                                                  |
| v3165  | 202.0953569 | 78.8  | 0.142    | 0.047   | 0.325   | 5.35E-05 | 0.014039 | HMDB29047 | Serinyl-Proline                                                |
| v2364  | 174.1004423 | 66.4  | 530763.5 | 2022.41 | 8.3E+09 | 0.000353 | 0.038789 | HMDB29127 | Valyl-Glycine                                                  |
| v1827  | 155.1310142 | 25.8  | 0.001    | 0       | 0.014   | 5.56E-05 | 0.014039 | HMDB30326 | Methylisopelletierine                                          |
| v2042  | 163.0480724 | 122.8 | 0        | 0       | 0.001   | 9.72E-05 | 0.017272 | HMDB30393 | L-N-Carboxymethylserine                                        |
| v10677 | 650.2210705 | 79.3  | 5.843    | 2.503   | 17.473  | 0.000297 | 0.034571 | HMDB30627 | 5-Hydroxy-734-trimethoxy-8-methylisoflavone 5-neohesperidoside |
| v5278  | 292.2038448 | 24.6  | 0        | 0       | 0.01    | 7.90E-05 | 0.015103 | HMDB30996 | (2E4Z7Z8E)-Coinelenic acid                                     |
| v2675  | 184.1463299 | 271.8 | 3.666    | 1.89    | 8.141   | 0.000414 | 0.042781 | HMDB31062 | (Z)-3-Methyl-3-decenoic acid                                   |
| v2675  | 184.1463299 | 271.8 | 3.666    | 1.89    | 8.141   | 0.000414 | 0.042781 | HMDB31063 | (Z)-3-Methyl-4-decenoic acid                                   |
| v2675  | 184.1463299 | 271.8 | 3.666    | 1.89    | 8.141   | 0.000414 | 0.042781 | HMDB31087 | trans-2-Hexyl-1-cyclopropaneacetic acid                        |
| v1827  | 155.1310142 | 25.8  | 0.001    | 0       | 0.014   | 5.56E-05 | 0.014039 | HMDB31179 | 2266-Tetramethyl-4-piperidinone                                |
| v2042  | 163.0489408 | 122.8 | 0        | 0       | 0.001   | 9.72E-05 | 0.017272 | HMDB31187 | Thialdine                                                      |
| v618   | 113.084064  | 32.3  | 0.042    | 0.005   | 0.165   | 0.000262 | 0.031993 | HMDB31199 | 25-Dihydro-245-trimethyloxazole                                |
| v2675  | 184.1463299 | 271.8 | 3.666    | 1.89    | 8.141   | 0.000414 | 0.042781 | HMDB31272 | Ethyl (E)-2-nonenolate                                         |
| v1076  | 130.0452356 | 79    | 3.133    | 1.733   | 6.32    | 0.000455 | 0.043876 | HMDB31370 | 2-(Methylthio)methyl-2-butenal                                 |
| v2675  | 184.1463299 | 271.8 | 3.666    | 1.89    | 8.141   | 0.000414 | 0.042781 | HMDB31406 | Ethyl 3-cyclohexylpropionate                                   |
| v1969  | 160.0847923 | 70.8  | 9.335    | 3.821   | 31.837  | 2.43E-05 | 0.012975 | HMDB31411 | 4-Acetamido-2-aminobutanoic acid                               |
| v2895  | 192.1150298 | 23.6  | 0.169    | 0.057   | 0.395   | 0.000253 | 0.031596 | HMDB31571 | 2-Methyl-1-phenyl-2-propanyl acetate                           |
| v2895  | 192.1150298 | 23.6  | 0.169    | 0.057   | 0.395   | 0.000253 | 0.031596 | HMDB31614 | 4-Phenyl-2-butyl acetate                                       |
| v2895  | 192.1150298 | 23.6  | 0.169    | 0.057   | 0.395   | 0.000253 | 0.031596 | HMDB31618 | Ethyl 4-phenylbutanoate                                        |
| v2675  | 184.1463299 | 271.8 | 3.666    | 1.89    | 8.141   | 0.000414 | 0.042781 | HMDB31691 | cis-3-Hexenyl pentanoate                                       |
| v618   | 113.084064  | 32.3  | 0.042    | 0.005   | 0.165   | 0.000262 | 0.031993 | HMDB31702 | 1-Piperidinecarboxaldehyde                                     |
| v2675  | 184.1463299 | 271.8 | 3.666    | 1.89    | 8.141   | 0.000414 | 0.042781 | HMDB31843 | 23-Undecanedione                                               |
| v6483  | 348.193674  | 29.3  | 0.278    | 0.138   | 0.502   | 7.74E-05 | 0.015103 | HMDB32010 | Gibberellin A110                                               |
| v6483  | 348.193674  | 29.3  | 0.278    | 0.138   | 0.502   | 7.74E-05 | 0.015103 | HMDB32011 | Gibberellin A112                                               |
| v2895  | 192.1150298 | 23.6  | 0.169    | 0.057   | 0.395   | 0.000253 | 0.031596 | HMDB32043 | Benzyl 3-methylbutanoate                                       |
| v2675  | 184.1463299 | 271.8 | 3.666    | 1.89    | 8.141   | 0.000414 | 0.042781 | HMDB32308 | (E)-3-Heptenyl 2-methylpropanoate                              |
| v2675  | 184.1463299 | 271.8 | 3.666    | 1.89    | 8.141   | 0.000414 | 0.042781 | HMDB32320 | 3-Hexenyl 2-methylbutyrate                                     |
| v2675  | 184.1463299 | 271.8 | 3.666    | 1.89    | 8.141   | 0.000414 | 0.042781 | HMDB32396 | Methyl 2-decenoate                                             |
| v2675  | 184.1463299 | 271.8 | 3.666    | 1.89    | 8.141   | 0.000414 | 0.042781 | HMDB32404 | 6-Methyl-5-hepten-2-one propyleneglycol acetal                 |
| v2675  | 184.1463299 | 271.8 | 3.666    | 1.89    | 8.141   | 0.000414 | 0.042781 | HMDB32453 | cis-3-Octenyl propionate                                       |
| v2675  | 184.1463299 | 271.8 | 3.666    | 1.89    | 8.141   | 0.000414 | 0.042781 | HMDB32461 | Pent-2-enyl hexanoate                                          |
| v4899  | 276.2089301 | 25.1  | 0.075    | 0.015   | 0.229   | 0.000149 | 0.022851 | HMDB32464 | Phenethyl decanoate                                            |
| v2675  | 184.1463299 | 271.8 | 3.666    | 1.89    | 8.141   | 0.000414 | 0.042781 | HMDB32489 | Prenyl caproate                                                |
| v2675  | 184.1463299 | 271.8 | 3.666    | 1.89    | 8.141   | 0.000414 | 0.042781 | HMDB32534 | trans-2-Hexenyl 2-methylbutyrate                               |
| v4899  | 276.2089301 | 25.1  | 0.075    | 0.015   | 0.229   | 0.000149 | 0.022851 | HMDB32672 | 481215-Octadecatetraenoic acid                                 |
| v6483  | 348.193674  | 29.3  | 0.278    | 0.138   | 0.502   | 7.74E-05 | 0.015103 | HMDB32895 | 3b-Hydroxy-6b-angeloyloxy-7(11)-eremophilene-128b-olide        |
| v6870  | 366.1889826 | 284.8 | 0.284    | 0.126   | 0.547   | 0.000605 | 0.049793 | HMDB33216 | (2R6x)-7-Methyl-3-methylene-1267-octanetetrol 2-glucoiside     |
| v2675  | 184.1463299 | 271.8 | 3.666    | 1.89    | 8.141   | 0.000414 | 0.042781 | HMDB33371 | Citronellyl formate                                            |



|        |             |       |          |         |         |          |          |           |                                                                 |
|--------|-------------|-------|----------|---------|---------|----------|----------|-----------|-----------------------------------------------------------------|
| v2895  | 192.1150298 | 23.6  | 0.169    | 0.057   | 0.395   | 0.000253 | 0.031596 | HMDB33380 | 3-Methylbutyl benzoate                                          |
| v5681  | 310.2144094 | 24.1  | 0.001    | 0       | 0.014   | 5.68E-05 | 0.014039 | HMDB33505 | (9Z11R12S13S15Z)-1213-Epoxy-11-hydroxy-915-octadecadienoic acid |
| v2675  | 184.1463299 | 271.8 | 3.666    | 1.89    | 8.141   | 0.000414 | 0.042781 | HMDB33724 | Undecylenic acid                                                |
| v6483  | 348.193674  | 29.3  | 0.278    | 0.138   | 0.502   | 7.74E-05 | 0.015103 | HMDB33981 | Cohumulone                                                      |
| v3165  | 202.0953569 | 78.8  | 0.142    | 0.047   | 0.325   | 5.35E-05 | 0.014039 | HMDB34266 | L-Coprine                                                       |
| v10677 | 650.2210705 | 79.3  | 5.843    | 2.503   | 17.473  | 0.000297 | 0.034571 | HMDB34281 | Egonol gentiobioside                                            |
| v24    | 85.08914936 | 44.2  | 0.061    | 0.013   | 0.188   | 2.80E-05 | 0.014011 | HMDB34301 | Piperidine                                                      |
| v2364  | 174.1004423 | 66.4  | 530763.5 | 2022.41 | 8.3E+09 | 0.000353 | 0.038789 | HMDB34365 | L-Theanine                                                      |
| v5936  | 323.3188149 | 26.6  | 0.095    | 0.028   | 0.222   | 3.85E-06 | 0.011973 | HMDB34373 | N-(14-Methylhexadecanoyl)pyrrolidine                            |
| v4899  | 276.2089301 | 25.1  | 0.075    | 0.015   | 0.229   | 0.000149 | 0.022851 | HMDB34382 | (EE)-1113-Octadecadien-9-ynoic acid                             |
| v2675  | 184.1463299 | 271.8 | 3.666    | 1.89    | 8.141   | 0.000414 | 0.042781 | HMDB34428 | Cyclohexyl 3-methylbutanoate                                    |
| v2675  | 184.1463299 | 271.8 | 3.666    | 1.89    | 8.141   | 0.000414 | 0.042781 | HMDB34429 | Cyclohexyl pentanoate                                           |
| v6212  | 336.2300595 | 28.4  | 0.32     | 0.157   | 0.583   | 0.000536 | 0.04761  | HMDB34686 | (14S)-1415-Dihydroxy-8(17)13(16)-labdadien-19-oic acid          |
| v6483  | 348.193674  | 29.3  | 0.278    | 0.138   | 0.502   | 7.74E-05 | 0.015103 | HMDB34999 | Bakkenolide C                                                   |
| v2895  | 192.1150298 | 23.6  | 0.169    | 0.057   | 0.395   | 0.000253 | 0.031596 | HMDB35010 | 2-Methylpropyl phenylacetate                                    |
| v2895  | 192.1150298 | 23.6  | 0.169    | 0.057   | 0.395   | 0.000253 | 0.031596 | HMDB35014 | 2-Phenylethyl butanoate                                         |
| v2895  | 192.1150298 | 23.6  | 0.169    | 0.057   | 0.395   | 0.000253 | 0.031596 | HMDB35015 | 2-Phenylethyl 2-methylpropanoate                                |
| v5681  | 310.2144094 | 24.1  | 0.001    | 0       | 0.014   | 5.68E-05 | 0.014039 | HMDB35337 | Sterebin A                                                      |
| v2895  | 192.1150298 | 23.6  | 0.169    | 0.057   | 0.395   | 0.000253 | 0.031596 | HMDB35447 | 5-Isopropyl-2-methylphenol acetate                              |
| v2675  | 184.1463299 | 271.8 | 3.666    | 1.89    | 8.141   | 0.000414 | 0.042781 | HMDB36140 | 5-Hexyldihydro-5-methyl-2(3H)-furanone                          |
| v2895  | 192.1150298 | 23.6  | 0.169    | 0.057   | 0.395   | 0.000253 | 0.031596 | HMDB36388 | 3-Phenylpropyl propanoate                                       |
| v2895  | 192.1150298 | 23.6  | 0.169    | 0.057   | 0.395   | 0.000253 | 0.031596 | HMDB36734 | 111213-Trinor-1(10)-spirovetivene-27-dione                      |
| v2675  | 184.1463299 | 271.8 | 3.666    | 1.89    | 8.141   | 0.000414 | 0.042781 | HMDB36784 | 6-Hexyltetrahydro-2H-pyran-2-one                                |
| v6483  | 348.193674  | 29.3  | 0.278    | 0.138   | 0.502   | 7.74E-05 | 0.015103 | HMDB36895 | Gibberellin A53                                                 |
| v2675  | 184.1463299 | 271.8 | 3.666    | 1.89    | 8.141   | 0.000414 | 0.042781 | HMDB37106 | (x)-1-Nonen-3-yl acetate                                        |
| v2895  | 192.1150298 | 23.6  | 0.169    | 0.057   | 0.395   | 0.000253 | 0.031596 | HMDB37165 | 4-Methyl-2-(1-phenylethyl)-13-dioxolane 9CI                     |
| v2675  | 184.1463299 | 271.8 | 3.666    | 1.89    | 8.141   | 0.000414 | 0.042781 | HMDB37185 | Rhodinyl formate                                                |
| v2675  | 184.1463299 | 271.8 | 3.666    | 1.89    | 8.141   | 0.000414 | 0.042781 | HMDB37225 | Methyl citronellate                                             |
| v618   | 113.084064  | 32.3  | 0.042    | 0.005   | 0.165   | 0.000262 | 0.031993 | HMDB37293 | 2-Acetylpyrrolidine                                             |
| v2675  | 184.1463299 | 271.8 | 3.666    | 1.89    | 8.141   | 0.000414 | 0.042781 | HMDB37309 | 5-Hexyldihydro-4-methyl-2(3H)-furanone                          |
| v1076  | 130.0452356 | 79    | 3.133    | 1.733   | 6.32    | 0.000455 | 0.043876 | HMDB37493 | S-2-Propenyl propanethioate                                     |
| v2895  | 192.1150298 | 23.6  | 0.169    | 0.057   | 0.395   | 0.000253 | 0.031596 | HMDB37709 | 4-Methylphenyl 3-methylbutanoate                                |
| v2895  | 192.1150298 | 23.6  | 0.169    | 0.057   | 0.395   | 0.000253 | 0.031596 | HMDB37716 | 1-Phenylethyl isobutyrate                                       |
| v2895  | 192.1150298 | 23.6  | 0.169    | 0.057   | 0.395   | 0.000253 | 0.031596 | HMDB37717 | 1-Phenylethyl butyrate                                          |
| v2895  | 192.1150298 | 23.6  | 0.169    | 0.057   | 0.395   | 0.000253 | 0.031596 | HMDB37792 | 1-Ethoxy-2-methoxy-4-(1-propenyl)benzene                        |
| v6519  | 350.009638  | 68    | 0.149    | 0.051   | 0.344   | 7.12E-05 | 0.01502  | HMDB37851 | Apigenin 7-sulfate                                              |
| v5278  | 292.2038448 | 24.6  | 0        | 0       | 0.01    | 7.90E-05 | 0.015103 | HMDB38035 | Panaquinquecol 1                                                |
| v2895  | 192.1150298 | 23.6  | 0.169    | 0.057   | 0.395   | 0.000253 | 0.031596 | HMDB38180 | 2-(2-Hydroxy-4-methylphenyl)-3-pentanone                        |
| v2675  | 184.1463299 | 271.8 | 3.666    | 1.89    | 8.141   | 0.000414 | 0.042781 | HMDB38273 | 2-Hexenyl valerate                                              |
| v2675  | 184.1463299 | 271.8 | 3.666    | 1.89    | 8.141   | 0.000414 | 0.042781 | HMDB38274 | 2-Hexenyl isovalerate                                           |
| v2675  | 184.1463299 | 271.8 | 3.666    | 1.89    | 8.141   | 0.000414 | 0.042781 | HMDB38277 | cis-3-Hexenyl 2-methylbutanoate                                 |
| v2675  | 184.1463299 | 271.8 | 3.666    | 1.89    | 8.141   | 0.000414 | 0.042781 | HMDB38278 | cis-3-Hexenyl 3-methylbutanoate                                 |
| v2675  | 184.1463299 | 271.8 | 3.666    | 1.89    | 8.141   | 0.000414 | 0.042781 | HMDB38311 | xi-gamma-Undecalactone                                          |
| v5681  | 310.2144094 | 24.1  | 0.001    | 0       | 0.014   | 5.68E-05 | 0.014039 | HMDB38484 | Auxin b                                                         |
| v2675  | 184.1463299 | 271.8 | 3.666    | 1.89    | 8.141   | 0.000414 | 0.042781 | HMDB38906 | 5-Octenyl propanoate                                            |
| v6212  | 336.2300595 | 28.4  | 0.32     | 0.157   | 0.583   | 0.000536 | 0.04761  | HMDB39171 | 9alpha-(3-Methylbutanoyloxy)-4S-hydroxy-10(14)-oplopen-3-one    |
| v6212  | 336.2300595 | 28.4  | 0.32     | 0.157   | 0.583   | 0.000536 | 0.04761  | HMDB39441 | ent-1(10)-Halimene-1519-dioic acid                              |
| v2895  | 192.1150298 | 23.6  | 0.169    | 0.057   | 0.395   | 0.000253 | 0.031596 | HMDB39496 | 2-Ethoxy-1-methoxy-4-(1-propenyl)benzene                        |
| v2895  | 192.1150298 | 23.6  | 0.169    | 0.057   | 0.395   | 0.000253 | 0.031596 | HMDB39643 | 111213-Trinor-135-bisabolatrien-10-oic acid                     |
| v1827  | 155.1310142 | 25.8  | 0.001    | 0       | 0.014   | 5.56E-05 | 0.014039 | HMDB39833 | 3-(1-Pyrrolidinyl)-2-pentanone                                  |
| v1827  | 155.1310142 | 25.8  | 0.001    | 0       | 0.014   | 5.56E-05 | 0.014039 | HMDB39834 | 2-(1-Pyrrolidinyl)-3-pentanone                                  |
| v2895  | 192.1150298 | 23.6  | 0.169    | 0.057   | 0.395   | 0.000253 | 0.031596 | HMDB39841 | 2-Benzyl-4S-dimethyl-13-dioxolane                               |

|        |             |       |       |       |       |          |          |              |                                                       |
|--------|-------------|-------|-------|-------|-------|----------|----------|--------------|-------------------------------------------------------|
| v6870  | 366.1889826 | 284.8 | 0.284 | 0.126 | 0.547 | 0.000605 | 0.049793 | HMDB39975    | (1S2S4R8S)-p-Menthane-1289-tetrol 2-glucoside         |
| v6870  | 366.1889826 | 284.8 | 0.284 | 0.126 | 0.547 | 0.000605 | 0.049793 | HMDB39976    | (1R2R4R8S)-p-Menthane-1289-tetrol 9-glucoside         |
| v1076  | 130.0452356 | 79    | 3.133 | 1.733 | 6.32  | 0.000455 | 0.043876 | HMDB40238    | 2-Ethylidihydro-3(2H)-thiophenone                     |
| v2895  | 192.1150298 | 23.6  | 0.169 | 0.057 | 0.395 | 0.000253 | 0.031596 | HMDB40427    | Butyl phenylacetate                                   |
| v2675  | 184.1463299 | 271.8 | 3.666 | 1.89  | 8.141 | 0.000414 | 0.042781 | HMDB40593    | 2-Propenyl octanoate                                  |
| v5278  | 292.2038448 | 24.6  | 0     | 0     | 0.01  | 7.90E-05 | 0.015103 | HMDB40806    | 7-Paradol                                             |
| v6483  | 348.193674  | 29.3  | 0.278 | 0.138 | 0.502 | 7.74E-05 | 0.015103 | HMDB40989    | 3b-Hydroxy-6b-tigloyloxy-7(11)-eremophilen-128b-olide |
| v1663  | 149.9986794 | 260.7 | 0.005 | 0     | 0.074 | 0.000459 | 0.043897 | HMDB42032    | Thiodiacetic acid                                     |
| v4608  | 263.0843696 | 93.3  | 2.894 | 1.664 | 5.726 | 0.000558 | 0.049106 | HMDB42056    | Tulobuterol                                           |
| v12056 | 830.7727264 | 67.1  | 0.266 | 0.123 | 0.498 | 0.000153 | 0.023067 | HMDB42540    | TG(14:018:2(9Z12Z)o-18:0)                             |
| v12056 | 830.7727264 | 67.1  | 0.266 | 0.123 | 0.498 | 0.000153 | 0.023067 | HMDB42600    | TG(14:020:2n6o-18:0)                                  |
| v12056 | 830.7727264 | 67.1  | 0.266 | 0.123 | 0.498 | 0.000153 | 0.023067 | HMDB42946    | TG(14:0o-18:018:2(9Z12Z))                             |
| v12056 | 830.7727264 | 67.1  | 0.266 | 0.123 | 0.498 | 0.000153 | 0.023067 | HMDB42948    | TG(14:0o-18:020:2n6)                                  |
| v12056 | 830.7727264 | 67.1  | 0.266 | 0.123 | 0.498 | 0.000153 | 0.023067 | HMDB52410    | TG(18:2(9Z12Z)14:0o-18:0)                             |
| v12056 | 830.7727264 | 67.1  | 0.266 | 0.123 | 0.498 | 0.000153 | 0.023067 | HMDB53276    | TG(20:2n614:0o-18:0)                                  |
| v6483  | 348.193674  | 29.3  | 0.278 | 0.138 | 0.502 | 7.74E-05 | 0.015103 | HMDB60094    | 1220-Dioxo-leukotriene B4                             |
| v6212  | 336.2300595 | 28.4  | 0.32  | 0.157 | 0.583 | 0.000536 | 0.04761  | HMDB60103    | 9-Deoxy-delta12-PGD2                                  |
| v6212  | 336.2300595 | 28.4  | 0.32  | 0.157 | 0.583 | 0.000536 | 0.04761  | HMDB60104    | Prostaglandin C1                                      |
| v6212  | 336.2300595 | 28.4  | 0.32  | 0.157 | 0.583 | 0.000536 | 0.04761  | HMDB60105    | 1220-DiHETE                                           |
| v1036  | 129.0425931 | 81.1  | 3.281 | 1.802 | 6.691 | 0.00032  | 0.036032 | HMDB60262    | 5-Oxoprolinate                                        |
| v8559  | 468.9511032 | 274.3 | 0.044 | 0.007 | 0.149 | 4.79E-05 | 0.014039 | HMDB60640    | Lamivudine-triphosphate                               |
| v1391  | 141.0112047 | 273.6 | 0.12  | 0.039 | 0.281 | 1.59E-05 | 0.012388 | HMDB60688    | Nornitrogen mustard                                   |
| v8589  | 471.0923475 | 89.5  | 3.486 | 1.817 | 7.794 | 0.000609 | 0.049793 | HMDB61083    | desbutyl-lumefantrine                                 |
| v1036  | 129.0425931 | 81.1  | 3.281 | 1.802 | 6.691 | 0.00032  | 0.036032 | HMDB61093    | dimethadione                                          |
| v7108  | 378.1943427 | 69.6  | 0.304 | 0.157 | 0.535 | 0.000112 | 0.018593 | HMDB61127    | 4R-Hydroxy solifenacin                                |
| v2675  | 184.14633   | 271.8 | 3.666 | 1.89  | 8.141 | 0.000414 | 0.042781 | LMFA01020130 | 27-dimethyl-6-nonenic acid                            |
| v2675  | 184.14633   | 271.8 | 3.666 | 1.89  | 8.141 | 0.000414 | 0.042781 | LMFA01020131 | 4-ethyl-2-methyl-2-octenoic acid                      |
| v2675  | 184.14633   | 271.8 | 3.666 | 1.89  | 8.141 | 0.000414 | 0.042781 | LMFA01030034 | 2-undecenoic acid                                     |
| v2675  | 184.14633   | 271.8 | 3.666 | 1.89  | 8.141 | 0.000414 | 0.042781 | LMFA01030035 | 9-undecenoic acid                                     |
| v2675  | 184.14633   | 271.8 | 3.666 | 1.89  | 8.141 | 0.000414 | 0.042781 | LMFA01030036 | 10-undecenoic acid                                    |
| v4899  | 276.20893   | 25.1  | 0.075 | 0.015 | 0.229 | 0.000149 | 0.022851 | LMFA01030167 | 3E9Z12Z15Z-octadecatetraenoic acid                    |
| v4899  | 276.20893   | 25.1  | 0.075 | 0.015 | 0.229 | 0.000149 | 0.022851 | LMFA01030169 | 691215-octadecatetraenoic acid                        |
| v4899  | 276.20893   | 25.1  | 0.075 | 0.015 | 0.229 | 0.000149 | 0.022851 | LMFA01030171 | 9E11E13E15E-octadecatetraenoic acid                   |
| v4899  | 276.20893   | 25.1  | 0.075 | 0.015 | 0.229 | 0.000149 | 0.022851 | LMFA01030172 | 9121517-octadecatetraenoic acid                       |
| v2675  | 184.14633   | 271.8 | 3.666 | 1.89  | 8.141 | 0.000414 | 0.042781 | LMFA01030217 | 2Z-undecenoic acid                                    |
| v2675  | 184.14633   | 271.8 | 3.666 | 1.89  | 8.141 | 0.000414 | 0.042781 | LMFA01030218 | 3E-undecenoic acid                                    |
| v2675  | 184.14633   | 271.8 | 3.666 | 1.89  | 8.141 | 0.000414 | 0.042781 | LMFA01030219 | 6Z-undecenoic acid                                    |
| v2675  | 184.14633   | 271.8 | 3.666 | 1.89  | 8.141 | 0.000414 | 0.042781 | LMFA01030220 | 8Z-undecenoic acid                                    |
| v2675  | 184.14633   | 271.8 | 3.666 | 1.89  | 8.141 | 0.000414 | 0.042781 | LMFA01030221 | 9Z-undecenoic acid                                    |
| v2895  | 192.11503   | 23.6  | 0.169 | 0.057 | 0.395 | 0.000253 | 0.031596 | LMFA01030240 | 2E4E8Z10E-dodecatetraenoic acid                       |
| v2895  | 192.11503   | 23.6  | 0.169 | 0.057 | 0.395 | 0.000253 | 0.031596 | LMFA01030241 | 2E6E8E10E-dodecatetraenoic acid                       |
| v2895  | 192.11503   | 23.6  | 0.169 | 0.057 | 0.395 | 0.000253 | 0.031596 | LMFA01030242 | 2E6E8Z10E-dodecatetraenoic acid                       |
| v4899  | 276.20893   | 25.1  | 0.075 | 0.015 | 0.229 | 0.000149 | 0.022851 | LMFA01030354 | 581114-octadecatetraenoic acid                        |
| v4899  | 276.20893   | 25.1  | 0.075 | 0.015 | 0.229 | 0.000149 | 0.022851 | LMFA01030355 | 591215-octadecatetraenoic acid                        |
| v4899  | 276.20893   | 25.1  | 0.075 | 0.015 | 0.229 | 0.000149 | 0.022851 | LMFA01030356 | 5Z8Z11Z14Z-octadecatetraenoic acid                    |
| v4899  | 276.20893   | 25.1  | 0.075 | 0.015 | 0.229 | 0.000149 | 0.022851 | LMFA01030357 | 6Z9Z12Z15Z-octadecatetraenoic acid                    |
| v4899  | 276.20893   | 25.1  | 0.075 | 0.015 | 0.229 | 0.000149 | 0.022851 | LMFA01030358 | 9Z11Z13E15E-octadecatetraenoic acid                   |
| v2895  | 192.11503   | 23.6  | 0.169 | 0.057 | 0.395 | 0.000253 | 0.031596 | LMFA01030464 | 511-dodecadiynoic acid                                |
| v4899  | 276.20893   | 25.1  | 0.075 | 0.015 | 0.229 | 0.000149 | 0.022851 | LMFA01030511 | 11E13E-octadecadien-9-ynoic acid                      |
| v4899  | 276.20893   | 25.1  | 0.075 | 0.015 | 0.229 | 0.000149 | 0.022851 | LMFA01030512 | 25-octadecadiynoic acid                               |
| v4899  | 276.20893   | 25.1  | 0.075 | 0.015 | 0.229 | 0.000149 | 0.022851 | LMFA01030513 | 26-octadecadiynoic acid                               |

|       |           |       |       |       |        |          |          |              |                                     |
|-------|-----------|-------|-------|-------|--------|----------|----------|--------------|-------------------------------------|
| v4899 | 276.20893 | 25.1  | 0.075 | 0.015 | 0.229  | 0.000149 | 0.022851 | LMFA01030514 | 27-octadecadiynoic acid             |
| v4899 | 276.20893 | 25.1  | 0.075 | 0.015 | 0.229  | 0.000149 | 0.022851 | LMFA01030515 | 36-octadecadiynoic acid             |
| v4899 | 276.20893 | 25.1  | 0.075 | 0.015 | 0.229  | 0.000149 | 0.022851 | LMFA01030516 | 37-octadecadiynoic acid             |
| v4899 | 276.20893 | 25.1  | 0.075 | 0.015 | 0.229  | 0.000149 | 0.022851 | LMFA01030517 | 38-octadecadiynoic acid             |
| v4899 | 276.20893 | 25.1  | 0.075 | 0.015 | 0.229  | 0.000149 | 0.022851 | LMFA01030518 | 46-octadecadiynoic acid             |
| v4899 | 276.20893 | 25.1  | 0.075 | 0.015 | 0.229  | 0.000149 | 0.022851 | LMFA01030519 | 47-octadecadiynoic acid             |
| v4899 | 276.20893 | 25.1  | 0.075 | 0.015 | 0.229  | 0.000149 | 0.022851 | LMFA01030520 | 48-octadecadiynoic acid             |
| v4899 | 276.20893 | 25.1  | 0.075 | 0.015 | 0.229  | 0.000149 | 0.022851 | LMFA01030521 | 49-octadecadiynoic acid             |
| v4899 | 276.20893 | 25.1  | 0.075 | 0.015 | 0.229  | 0.000149 | 0.022851 | LMFA01030522 | 57-octadecadiynoic acid             |
| v4899 | 276.20893 | 25.1  | 0.075 | 0.015 | 0.229  | 0.000149 | 0.022851 | LMFA01030523 | 58-octadecadiynoic acid             |
| v4899 | 276.20893 | 25.1  | 0.075 | 0.015 | 0.229  | 0.000149 | 0.022851 | LMFA01030524 | 59-octadecadiynoic acid             |
| v4899 | 276.20893 | 25.1  | 0.075 | 0.015 | 0.229  | 0.000149 | 0.022851 | LMFA01030525 | 510-octadecadiynoic acid            |
| v4899 | 276.20893 | 25.1  | 0.075 | 0.015 | 0.229  | 0.000149 | 0.022851 | LMFA01030526 | 512-octadecadiynoic acid            |
| v4899 | 276.20893 | 25.1  | 0.075 | 0.015 | 0.229  | 0.000149 | 0.022851 | LMFA01030527 | 68-octadecadiynoic acid             |
| v4899 | 276.20893 | 25.1  | 0.075 | 0.015 | 0.229  | 0.000149 | 0.022851 | LMFA01030528 | 69-octadecadiynoic acid             |
| v4899 | 276.20893 | 25.1  | 0.075 | 0.015 | 0.229  | 0.000149 | 0.022851 | LMFA01030529 | 610-octadecadiynoic acid            |
| v4899 | 276.20893 | 25.1  | 0.075 | 0.015 | 0.229  | 0.000149 | 0.022851 | LMFA01030530 | 611-octadecadiynoic acid            |
| v4899 | 276.20893 | 25.1  | 0.075 | 0.015 | 0.229  | 0.000149 | 0.022851 | LMFA01030531 | 612-octadecadiynoic acid            |
| v4899 | 276.20893 | 25.1  | 0.075 | 0.015 | 0.229  | 0.000149 | 0.022851 | LMFA01030532 | 79-octadecadiynoic acid             |
| v4899 | 276.20893 | 25.1  | 0.075 | 0.015 | 0.229  | 0.000149 | 0.022851 | LMFA01030533 | 710-octadecadiynoic acid            |
| v4899 | 276.20893 | 25.1  | 0.075 | 0.015 | 0.229  | 0.000149 | 0.022851 | LMFA01030534 | 711-octadecadiynoic acid            |
| v4899 | 276.20893 | 25.1  | 0.075 | 0.015 | 0.229  | 0.000149 | 0.022851 | LMFA01030535 | 712-octadecadiynoic acid            |
| v4899 | 276.20893 | 25.1  | 0.075 | 0.015 | 0.229  | 0.000149 | 0.022851 | LMFA01030536 | 810-octadecadiynoic acid            |
| v4899 | 276.20893 | 25.1  | 0.075 | 0.015 | 0.229  | 0.000149 | 0.022851 | LMFA01030537 | 811-octadecadiynoic acid            |
| v4899 | 276.20893 | 25.1  | 0.075 | 0.015 | 0.229  | 0.000149 | 0.022851 | LMFA01030538 | 812-octadecadiynoic acid            |
| v4899 | 276.20893 | 25.1  | 0.075 | 0.015 | 0.229  | 0.000149 | 0.022851 | LMFA01030539 | 911-octadecadiynoic acid            |
| v4899 | 276.20893 | 25.1  | 0.075 | 0.015 | 0.229  | 0.000149 | 0.022851 | LMFA01030540 | 912-octadecadiynoic acid            |
| v4899 | 276.20893 | 25.1  | 0.075 | 0.015 | 0.229  | 0.000149 | 0.022851 | LMFA01030541 | 913-octadecadiynoic acid            |
| v4899 | 276.20893 | 25.1  | 0.075 | 0.015 | 0.229  | 0.000149 | 0.022851 | LMFA01030542 | 1012-octadecadiynoic acid           |
| v4899 | 276.20893 | 25.1  | 0.075 | 0.015 | 0.229  | 0.000149 | 0.022851 | LMFA01030543 | 1013-octadecadiynoic acid           |
| v4899 | 276.20893 | 25.1  | 0.075 | 0.015 | 0.229  | 0.000149 | 0.022851 | LMFA01030544 | 1014-octadecadiynoic acid           |
| v4899 | 276.20893 | 25.1  | 0.075 | 0.015 | 0.229  | 0.000149 | 0.022851 | LMFA01030545 | 1114-octadecadiynoic acid           |
| v4899 | 276.20893 | 25.1  | 0.075 | 0.015 | 0.229  | 0.000149 | 0.022851 | LMFA01030546 | 1115-octadecadiynoic acid           |
| v4899 | 276.20893 | 25.1  | 0.075 | 0.015 | 0.229  | 0.000149 | 0.022851 | LMFA01030547 | 1214-octadecadiynoic acid           |
| v4899 | 276.20893 | 25.1  | 0.075 | 0.015 | 0.229  | 0.000149 | 0.022851 | LMFA01030548 | 1215-octadecadiynoic acid           |
| v4899 | 276.20893 | 25.1  | 0.075 | 0.015 | 0.229  | 0.000149 | 0.022851 | LMFA01030549 | 1216-octadecadiynoic acid           |
| v4899 | 276.20893 | 25.1  | 0.075 | 0.015 | 0.229  | 0.000149 | 0.022851 | LMFA01030550 | 1316-octadecadiynoic acid           |
| v4899 | 276.20893 | 25.1  | 0.075 | 0.015 | 0.229  | 0.000149 | 0.022851 | LMFA01030551 | 1317-octadecadiynoic acid           |
| v4899 | 276.20893 | 25.1  | 0.075 | 0.015 | 0.229  | 0.000149 | 0.022851 | LMFA01030552 | 1417-octadecadiynoic acid           |
| v2675 | 184.14633 | 271.8 | 3.666 | 1.89  | 8.141  | 0.000414 | 0.042781 | LMFA01030606 | 4-undecenoic acid                   |
| v2675 | 184.14633 | 271.8 | 3.666 | 1.89  | 8.141  | 0.000414 | 0.042781 | LMFA01030608 | 6-undecenoic acid                   |
| v2675 | 184.14633 | 271.8 | 3.666 | 1.89  | 8.141  | 0.000414 | 0.042781 | LMFA01030609 | 7-undecenoic acid                   |
| v4899 | 276.20893 | 25.1  | 0.075 | 0.015 | 0.229  | 0.000149 | 0.022851 | LMFA01030734 | 9Z12Z-Octadecadien-6-ynoic acid     |
| v4899 | 276.20893 | 25.1  | 0.075 | 0.015 | 0.229  | 0.000149 | 0.022851 | LMFA01030735 | 9Z14Z-Octadecadien-12-ynoic acid    |
| v4899 | 276.20893 | 25.1  | 0.075 | 0.015 | 0.229  | 0.000149 | 0.022851 | LMFA01030764 | 9Z11E13E15Z-octadecatetraenoic acid |
| v2675 | 184.14633 | 271.8 | 3.666 | 1.89  | 8.141  | 0.000414 | 0.042781 | LMFA01030785 | 5E-undecenoic acid                  |
| v2675 | 184.14633 | 271.8 | 3.666 | 1.89  | 8.141  | 0.000414 | 0.042781 | LMFA01030786 | 5Z-undecenoic acid                  |
| v4899 | 276.20893 | 25.1  | 0.075 | 0.015 | 0.229  | 0.000149 | 0.022851 | LMFA01030813 | 2E4E6E11Z-octadecatetraenoic acid   |
| v6000 | 326.2821  | 25.5  | 4.275 | 2.164 | 10.106 | 0.000163 | 0.024299 | LMFA01050117 | 14-hydroxy-11Z-eicosenoic acid      |
| v6000 | 326.2821  | 25.5  | 4.275 | 2.164 | 10.106 | 0.000163 | 0.024299 | LMFA01050256 | 14R-hydroxy-11E-eicosenoic acid     |
| v6000 | 326.2821  | 25.5  | 4.275 | 2.164 | 10.106 | 0.000163 | 0.024299 | LMFA01050257 | 14R-hydroxy-11Z-eicosenoic acid     |
| v6000 | 326.2821  | 25.5  | 4.275 | 2.164 | 10.106 | 0.000163 | 0.024299 | LMFA01060132 | 19-oxo-eicosanoic acid              |
| v6000 | 326.2821  | 25.5  | 4.275 | 2.164 | 10.106 | 0.000163 | 0.024299 | LMFA01060133 | 2-oxo-eicosanoic acid               |
| v6000 | 326.2821  | 25.5  | 4.275 | 2.164 | 10.106 | 0.000163 | 0.024299 | LMFA01060134 | 3-oxo-eicosanoic acid               |
| v4899 | 276.20893 | 25.1  | 0.075 | 0.015 | 0.229  | 0.000149 | 0.022851 | LMFA01140005 | 6-3-ladderane-hexanoic acid         |

|       |           |      |       |       |       |          |          |              |                                                             |
|-------|-----------|------|-------|-------|-------|----------|----------|--------------|-------------------------------------------------------------|
| v6212 | 336.23006 | 28.4 | 0.32  | 0.157 | 0.583 | 0.000536 | 0.04761  | LMFA01170128 | 5Z8Z11Z-Eicosatrienedioic acid                              |
| v5681 | 310.21441 | 24.1 | 0.001 | 0     | 0.014 | 5.68E-05 | 0.014039 | LMFA02000018 | 9S-hydroperoxy-10E12Z15Z-octadecatrienoic acid              |
| v5681 | 310.21441 | 24.1 | 0.001 | 0     | 0.014 | 5.68E-05 | 0.014039 | LMFA02000019 | 9S-hydroxy-10S11S-epoxy-12Z15Z-octadecadienoic acid         |
| v5681 | 310.21441 | 24.1 | 0.001 | 0     | 0.014 | 5.68E-05 | 0.014039 | LMFA02000020 | 9S-hydroxy-12R13S-epoxy-10E15Z-octadecadienoic acid         |
| v5278 | 292.20385 | 24.6 | 0     | 0     | 0.01  | 7.90E-05 | 0.015103 | LMFA02000028 | 13-keto-9Z11E15Z-octadecatrienoic acid                      |
| v5681 | 310.21441 | 24.1 | 0.001 | 0     | 0.014 | 5.68E-05 | 0.014039 | LMFA02000030 | 1516-epoxy-13-OH-9Z11E-octadecadienoic acid                 |
| v5681 | 310.21441 | 24.1 | 0.001 | 0     | 0.014 | 5.68E-05 | 0.014039 | LMFA02000052 | 13S-hydroperoxy-9Z11E15Z-octadecatrienoic acid              |
| v5278 | 292.20385 | 24.6 | 0     | 0     | 0.01  | 7.90E-05 | 0.015103 | LMFA02000053 | 1213S-epoxy-9Z1115Z-octadecatrienoic acid                   |
| v5681 | 310.21441 | 24.1 | 0.001 | 0     | 0.014 | 5.68E-05 | 0.014039 | LMFA02000108 | 9-hydroperoxy-10E1215Z-octadecatrienoic acid                |
| v5681 | 310.21441 | 24.1 | 0.001 | 0     | 0.014 | 5.68E-05 | 0.014039 | LMFA02000109 | 12-hydroperoxy-9Z13E15-octadecatrienoic acid                |
| v5681 | 310.21441 | 24.1 | 0.001 | 0     | 0.014 | 5.68E-05 | 0.014039 | LMFA02000110 | 13-hydroperoxy-911E15Z-octadecatrienoic acid                |
| v5681 | 310.21441 | 24.1 | 0.001 | 0     | 0.014 | 5.68E-05 | 0.014039 | LMFA02000111 | 16-hydroperoxy-9Z1214E-octadecatrienoic acid                |
| v5681 | 310.21441 | 24.1 | 0.001 | 0     | 0.014 | 5.68E-05 | 0.014039 | LMFA02000112 | 13S-hydroperoxy-6Z9Z11E-octadecatrienoic acid               |
| v5681 | 310.21441 | 24.1 | 0.001 | 0     | 0.014 | 5.68E-05 | 0.014039 | LMFA02000114 | 13S-hydroperoxy-9Z11E14Z-octadecatrienoic acid              |
| v5278 | 292.20385 | 24.6 | 0     | 0     | 0.01  | 7.90E-05 | 0.015103 | LMFA02000191 | (-)-8-hydroxy-11E17-octadecadien-9-ynoic acid               |
| v5278 | 292.20385 | 24.6 | 0     | 0     | 0.01  | 7.90E-05 | 0.015103 | LMFA02000192 | 9-hydroxy-10E14Z-octadecadien-12-ynoic acid                 |
| v5278 | 292.20385 | 24.6 | 0     | 0     | 0.01  | 7.90E-05 | 0.015103 | LMFA02000193 | 8-hydroxy-911-octadecadiynoic acid                          |
| v5278 | 292.20385 | 24.6 | 0     | 0     | 0.01  | 7.90E-05 | 0.015103 | LMFA02000194 | 8-hydroxy-1012-octadecadiynoic acid                         |
| v5681 | 310.21441 | 24.1 | 0.001 | 0     | 0.014 | 5.68E-05 | 0.014039 | LMFA02000226 | 7S8S-dihydroxy-9Z12Z15Z-octadecatrienoic acid               |
| v5681 | 310.21441 | 24.1 | 0.001 | 0     | 0.014 | 5.68E-05 | 0.014039 | LMFA02000247 | 9-oxo-1213-epoxy-10-octadecenoic acid                       |
| v5278 | 292.20385 | 24.6 | 0     | 0     | 0.01  | 7.90E-05 | 0.015103 | LMFA02000273 | 4-oxo-9Z11E13E-octadecatrienoic acid                        |
| v5681 | 310.21441 | 24.1 | 0.001 | 0     | 0.014 | 5.68E-05 | 0.014039 | LMFA02000279 | 910-epoxy-13-oxo-11-octadecenoic acid                       |
| v5278 | 292.20385 | 24.6 | 0     | 0     | 0.01  | 7.90E-05 | 0.015103 | LMFA02010001 | (152S)-3-oxo-2-(2Z-pentenyl)cyclopent-4-eneoctanoic acid    |
| v6212 | 336.23006 | 28.4 | 0.32  | 0.157 | 0.583 | 0.000536 | 0.04761  | LMFA03010005 | 9-oxo-15S-hydroxy-10Z13E-prostadienoic acid                 |
| v6212 | 336.23006 | 28.4 | 0.32  | 0.157 | 0.583 | 0.000536 | 0.04761  | LMFA03010047 | 9-oxo-15R-hydroxy-10Z13E-prostadienoic acid                 |
| v6212 | 336.23006 | 28.4 | 0.32  | 0.157 | 0.583 | 0.000536 | 0.04761  | LMFA03010061 | 9-oxo-15S-hydroxy-5Z13E-prostadienoic acid                  |
| v6212 | 336.23006 | 28.4 | 0.32  | 0.157 | 0.583 | 0.000536 | 0.04761  | LMFA03010071 | 9S15S-dihydroxy-5Z13E-prostadienoic acid-111R-lactone       |
| v6212 | 336.23006 | 28.4 | 0.32  | 0.157 | 0.583 | 0.000536 | 0.04761  | LMFA03010072 | 9S11R-dihydroxy-5Z13E-prostadienoic acid-115S-lactone       |
| v6212 | 336.23006 | 28.4 | 0.32  | 0.157 | 0.583 | 0.000536 | 0.04761  | LMFA03010131 | 9-oxo-15S-hydroxy-8(12)13E-prostadienoic acid               |
| v6212 | 336.23006 | 28.4 | 0.32  | 0.157 | 0.583 | 0.000536 | 0.04761  | LMFA03010160 | 9-oxo-15S-hydroxy-11Z13E-prostadienoic acid                 |
| v6212 | 336.23006 | 28.4 | 0.32  | 0.157 | 0.583 | 0.000536 | 0.04761  | LMFA03010196 | 11R15S-dihydroxy-5Z13E-prostadienoic acid-19S-lactone       |
| v6212 | 336.23006 | 28.4 | 0.32  | 0.157 | 0.583 | 0.000536 | 0.04761  | LMFA03020001 | 5S12R-dihydroxy-6Z8E10E14Z-eicosatetraenoic acid            |
| v6212 | 336.23006 | 28.4 | 0.32  | 0.157 | 0.583 | 0.000536 | 0.04761  | LMFA03020013 | 5S12R-dihydroxy-6E8E10E14Z-eicosatetraenoic acid            |
| v6212 | 336.23006 | 28.4 | 0.32  | 0.157 | 0.583 | 0.000536 | 0.04761  | LMFA03020014 | 5S12S-dihydroxy-6E8E10E14Z-eicosatetraenoic acid            |
| v6212 | 336.23006 | 28.4 | 0.32  | 0.157 | 0.583 | 0.000536 | 0.04761  | LMFA03020015 | 5S12S-dihydroxy-6Z8E10E14Z-eicosatetraenoic acid            |
| v6212 | 336.23006 | 28.4 | 0.32  | 0.157 | 0.583 | 0.000536 | 0.04761  | LMFA03020041 | (5R6Z8E14Z)-5-hydroxy-12-oxoicosa-6814-trienoic acid        |
| v6212 | 336.23006 | 28.4 | 0.32  | 0.157 | 0.583 | 0.000536 | 0.04761  | LMFA03020071 | (8E10E12R14Z)-12-hydroxy-5-oxoicosa-81014-trienoic acid     |
| v6212 | 336.23006 | 28.4 | 0.32  | 0.157 | 0.583 | 0.000536 | 0.04761  | LMFA03020072 | (5S6E8Z10E12R14Z)-512-dihydroxyicosa-681014-tetraenoic acid |
| v6212 | 336.23006 | 28.4 | 0.32  | 0.157 | 0.583 | 0.000536 | 0.04761  | LMFA03060010 | 5S15S-dihydroxy-6E8Z11Z13E-eicosatetraenoic acid            |
| v6212 | 336.23006 | 28.4 | 0.32  | 0.157 | 0.583 | 0.000536 | 0.04761  | LMFA03060012 | 5S-hydroperoxy-6E8Z11Z14Z-eicosatetraenoic acid             |
| v6212 | 336.23006 | 28.4 | 0.32  | 0.157 | 0.583 | 0.000536 | 0.04761  | LMFA03060013 | 12S-hydroperoxy-5Z8Z10E14Z-eicosatetraenoic acid            |
| v6212 | 336.23006 | 28.4 | 0.32  | 0.157 | 0.583 | 0.000536 | 0.04761  | LMFA03060014 | 15S-hydroperoxy-5Z8Z11Z13E-eicosatetraenoic acid            |
| v6212 | 336.23006 | 28.4 | 0.32  | 0.157 | 0.583 | 0.000536 | 0.04761  | LMFA03060017 | 5S6R-dihydroxy-7E9E11Z14Z-eicosatetraenoic acid             |
| v6212 | 336.23006 | 28.4 | 0.32  | 0.157 | 0.583 | 0.000536 | 0.04761  | LMFA03060018 | 5S6S-dihydroxy-7E9E11Z14Z-eicosatetraenoic acid             |
| v6212 | 336.23006 | 28.4 | 0.32  | 0.157 | 0.583 | 0.000536 | 0.04761  | LMFA03060037 | 8R-hydroperoxy-5Z9E11Z14Z-eicosatetraenoic acid             |
| v6212 | 336.23006 | 28.4 | 0.32  | 0.157 | 0.583 | 0.000536 | 0.04761  | LMFA03060040 | 9-hydroperoxy-57E11Z14Z-eicosatetraenoic acid               |
| v6212 | 336.23006 | 28.4 | 0.32  | 0.157 | 0.583 | 0.000536 | 0.04761  | LMFA03060041 | 11-hydroperoxy-5Z8Z12E14-eicosatetraenoic acid              |
| v6212 | 336.23006 | 28.4 | 0.32  | 0.157 | 0.583 | 0.000536 | 0.04761  | LMFA03060044 | 6-hydroperoxy-4E8Z11Z14Z-eicosatetraenoic acid              |
| v6212 | 336.23006 | 28.4 | 0.32  | 0.157 | 0.583 | 0.000536 | 0.04761  | LMFA03060045 | 14-hydroperoxy-5Z8Z11Z15E-eicosatetraenoic acid             |
| v6212 | 336.23006 | 28.4 | 0.32  | 0.157 | 0.583 | 0.000536 | 0.04761  | LMFA03060050 | 8S15S-dihydroxy-5Z9E11Z13E-eicosatetraenoic acid            |
| v6212 | 336.23006 | 28.4 | 0.32  | 0.157 | 0.583 | 0.000536 | 0.04761  | LMFA03060052 | 512-dihydroxy-681014-eicosatetraenoic acid                  |
| v6212 | 336.23006 | 28.4 | 0.32  | 0.157 | 0.583 | 0.000536 | 0.04761  | LMFA03060053 | 815-dihydroxy-591113-eicosatetraenoic acid                  |
| v6212 | 336.23006 | 28.4 | 0.32  | 0.157 | 0.583 | 0.000536 | 0.04761  | LMFA03060070 | 12R-hydroperoxy-5Z8Z10E14Z-eicosatetraenoic acid            |
| v6212 | 336.23006 | 28.4 | 0.32  | 0.157 | 0.583 | 0.000536 | 0.04761  | LMFA03060071 | 11R-hydroperoxy-5Z8Z12E14Z-eicosatetraenoic acid            |
| v6212 | 336.23006 | 28.4 | 0.32  | 0.157 | 0.583 | 0.000536 | 0.04761  | LMFA03060072 | 9S-hydroperoxy-5Z7E11Z14Z-eicosatetraenoic acid             |

|       |           |       |       |       |       |          |          |              |                                                                                                        |
|-------|-----------|-------|-------|-------|-------|----------|----------|--------------|--------------------------------------------------------------------------------------------------------|
| v6212 | 336.23006 | 28.4  | 0.32  | 0.157 | 0.583 | 0.000536 | 0.04761  | LMFA03060073 | 8S-hydroperoxy-5Z9E11Z14Z-eicosatetraenoic acid                                                        |
| v6212 | 336.23006 | 28.4  | 0.32  | 0.157 | 0.583 | 0.000536 | 0.04761  | LMFA03060076 | (-)-89-dihydroxy-5Z11Z14Z17Z-eicosatetraenoic acid                                                     |
| v6212 | 336.23006 | 28.4  | 0.32  | 0.157 | 0.583 | 0.000536 | 0.04761  | LMFA03060077 | (-)-1415-dihydroxy-5Z8Z11Z17Z-eicosatetraenoic acid                                                    |
| v6212 | 336.23006 | 28.4  | 0.32  | 0.157 | 0.583 | 0.000536 | 0.04761  | LMFA03060078 | (-)-1718-dihydroxy-5Z8Z11Z14Z-eicosatetraenoic acid                                                    |
| v6212 | 336.23006 | 28.4  | 0.32  | 0.157 | 0.583 | 0.000536 | 0.04761  | LMFA03060079 | (-)-1112-dihydroxy-5Z8Z14Z17Z-eicosatetraenoic acid                                                    |
| v6212 | 336.23006 | 28.4  | 0.32  | 0.157 | 0.583 | 0.000536 | 0.04761  | LMFA03060090 | 1415-dihydroxy-581012-eicosatetraenoic acid                                                            |
| v6212 | 336.23006 | 28.4  | 0.32  | 0.157 | 0.583 | 0.000536 | 0.04761  | LMFA03060095 | 5S11R-dihydroxy-6E8Z12E14Z-eicosatetraenoic acid                                                       |
| v6212 | 336.23006 | 28.4  | 0.32  | 0.157 | 0.583 | 0.000536 | 0.04761  | LMFA03060096 | 5S15R-dihydroxy-6E8Z11Z13E-eicosatetraenoic acid                                                       |
| v6212 | 336.23006 | 28.4  | 0.32  | 0.157 | 0.583 | 0.000536 | 0.04761  | LMFA03060101 | 5S12S-dihydroxy-6E8Z10E14Z-eicosatetraenoic acid                                                       |
| v6212 | 336.23    | 28.4  | 0.32  | 0.157 | 0.583 | 0.000536 | 0.04761  | LMFA03060102 | (5Z8Z11Z13E)-15-hydroperoxyeicosa-581113-tetraenoic acid                                               |
| v6212 | 336.23006 | 28.4  | 0.32  | 0.157 | 0.583 | 0.000536 | 0.04761  | LMFA03060107 | (6E8Z11Z13E)-515-dihydroxyicosa-681113-tetraenoic acid                                                 |
| v6212 | 336.23006 | 28.4  | 0.32  | 0.157 | 0.583 | 0.000536 | 0.04761  | LMFA03060108 | -                                                                                                      |
| v6212 | 336.23006 | 28.4  | 0.32  | 0.157 | 0.583 | 0.000536 | 0.04761  | LMFA03060109 | (5Z9E11Z13E)-815-dihydroxyicosa-591113-tetraenoic acid                                                 |
| v6483 | 348.19368 | 29.3  | 0.278 | 0.138 | 0.502 | 7.74E-05 | 0.015103 | LMFA03070044 | 18-oxo-5S12R-dihydroxy-6Z8E10E14Z16E-eicosapentaenoic acid                                             |
| v6483 | 348.19368 | 29.3  | 0.278 | 0.138 | 0.502 | 7.74E-05 | 0.015103 | LMFA03070047 | 12-oxo-5S18S-dihydroxy-6Z8E10E14Z16E-eicosapentaenoic acid                                             |
| v6212 | 336.23006 | 28.4  | 0.32  | 0.157 | 0.583 | 0.000536 | 0.04761  | LMFA03080007 | 1112-epoxy-15S-hydroxy-5Z8Z13E-eicosatrienoic acid                                                     |
| v6212 | 336.23006 | 28.4  | 0.32  | 0.157 | 0.583 | 0.000536 | 0.04761  | LMFA03080008 | 11-hydroxy-1415-epoxy-5Z8Z12E-eicosatrienoic acid                                                      |
| v6212 | 336.23006 | 28.4  | 0.32  | 0.157 | 0.583 | 0.000536 | 0.04761  | LMFA03080012 | 11R12S-epoxy-8-hydroxy-5Z9E14Z-eicosatrienoic acid                                                     |
| v6212 | 336.23006 | 28.4  | 0.32  | 0.157 | 0.583 | 0.000536 | 0.04761  | LMFA03090003 | 10-hydroxy-11S12S-epoxy-5Z8Z14Z-eicosatrienoic acid                                                    |
| v6212 | 336.23006 | 28.4  | 0.32  | 0.157 | 0.583 | 0.000536 | 0.04761  | LMFA03090005 | 8-hydroxy-11S12S-epoxy-5Z14Z9E-eicosatrienoic acid                                                     |
| v6212 | 336.23006 | 28.4  | 0.32  | 0.157 | 0.583 | 0.000536 | 0.04761  | LMFA03090006 | 13R-hydroxy-14S15S-epoxy-5Z8Z11Z-eicosatrienoic acid                                                   |
| v6212 | 336.23006 | 28.4  | 0.32  | 0.157 | 0.583 | 0.000536 | 0.04761  | LMFA03090007 | 11S-hydroxy-14S15S-epoxy-5Z8Z12E-eicosatrienoic acid                                                   |
| v6212 | 336.23006 | 28.4  | 0.32  | 0.157 | 0.583 | 0.000536 | 0.04761  | LMFA03110008 | 9-oxo-15S-hydroxy-10Z13E-prostadienoic acid-cyclo8S12S                                                 |
| v5278 | 292.20385 | 24.6  | 0     | 0     | 0.01  | 7.90E-05 | 0.015103 | LMFA05000686 | 10-methoxyheptadec-1-en-46-diyne-39-diol                                                               |
| v2675 | 184.14633 | 271.8 | 3.666 | 1.89  | 8.141 | 0.000414 | 0.042781 | LMFA07010198 | 6E-Nonenyl acetate                                                                                     |
| v2675 | 184.14633 | 271.8 | 3.666 | 1.89  | 8.141 | 0.000414 | 0.042781 | LMFA07010199 | 2-Nonenyl acetate                                                                                      |
| v2675 | 184.14633 | 271.8 | 3.666 | 1.89  | 8.141 | 0.000414 | 0.042781 | LMFA07010477 | formyl 4Z-decenoate                                                                                    |
| v2675 | 184.14633 | 271.8 | 3.666 | 1.89  | 8.141 | 0.000414 | 0.042781 | LMFA07010524 | formyl 37-dimethyl-6E-octenoate                                                                        |
| v2675 | 184.14633 | 271.8 | 3.666 | 1.89  | 8.141 | 0.000414 | 0.042781 | LMFA07010592 | (Z)-3-Hexenyl 3-methylbutanoate                                                                        |
| v2675 | 184.14633 | 271.8 | 3.666 | 1.89  | 8.141 | 0.000414 | 0.042781 | LMFA07010717 | (2E)-hex-2-en-1-yl 3-methylbutanoate                                                                   |
| v2675 | 184.14633 | 271.8 | 3.666 | 1.89  | 8.141 | 0.000414 | 0.042781 | LMFA07010719 | (2E)-hex-2-en-1-yl pentanoate                                                                          |
| v2675 | 184.14633 | 271.8 | 3.666 | 1.89  | 8.141 | 0.000414 | 0.042781 | LMFA07010748 | prop-2-en-1-yl octanoate                                                                               |
| v2675 | 184.14633 | 271.8 | 3.666 | 1.89  | 8.141 | 0.000414 | 0.042781 | LMFA07010752 | hex-3-en-1-yl 2-methylbutanoate                                                                        |
| v2675 | 184.14633 | 271.8 | 3.666 | 1.89  | 8.141 | 0.000414 | 0.042781 | LMFA07010767 | (5Z)-oct-5-en-1-yl propanoate                                                                          |
| v2675 | 184.14633 | 271.8 | 3.666 | 1.89  | 8.141 | 0.000414 | 0.042781 | LMFA07010804 | (3Z)-hex-3-en-1-yl 2-methylbutanoate                                                                   |
| v2675 | 184.14633 | 271.8 | 3.666 | 1.89  | 8.141 | 0.000414 | 0.042781 | LMFA07010807 | (3Z)-hex-3-en-1-yl pentanoate                                                                          |
| v2675 | 184.14633 | 271.8 | 3.666 | 1.89  | 8.141 | 0.000414 | 0.042781 | LMFA07010810 | (3Z)-oct-3-en-1-yl propanoate                                                                          |
| v2675 | 184.14633 | 271.8 | 3.666 | 1.89  | 8.141 | 0.000414 | 0.042781 | LMFA07010823 | cyclohexyl 3-methylbutanoate                                                                           |
| v2675 | 184.14633 | 271.8 | 3.666 | 1.89  | 8.141 | 0.000414 | 0.042781 | LMFA07010825 | cyclohexyl pentanoate                                                                                  |
| v2675 | 184.14633 | 271.8 | 3.666 | 1.89  | 8.141 | 0.000414 | 0.042781 | LMFA07010862 | ethyl 3-cyclohexylpropanoate                                                                           |
| v2895 | 192.11503 | 23.6  | 0.169 | 0.057 | 0.395 | 0.000253 | 0.031596 | LMFA07010871 | ethyl 4-phenylbutanoate                                                                                |
| v6483 | 348.19367 | 29.3  | 0.278 | 0.138 | 0.502 | 7.74E-05 | 0.015103 | LMFA07010888 | (15Z10R)-10-acetyl-3-methyl-7-methylidene-6-oxocyclodec-2-en-1-yl (2E)-4-hydroxy-4-methylpent-2-enoate |
| v2675 | 184.14633 | 271.8 | 3.666 | 1.89  | 8.141 | 0.000414 | 0.042781 | LMFA07010939 | methyl dec-2-enoate                                                                                    |
| v2675 | 184.14633 | 271.8 | 3.666 | 1.89  | 8.141 | 0.000414 | 0.042781 | LMFA07010987 | (2Z)-pent-2-en-1-yl hexanoate                                                                          |
| v2675 | 184.14633 | 271.8 | 3.666 | 1.89  | 8.141 | 0.000414 | 0.042781 | LMFA07011028 | (2E)-hex-2-en-1-yl 2-methylbutanoate                                                                   |
| v2675 | 184.14633 | 271.8 | 3.666 | 1.89  | 8.141 | 0.000414 | 0.042781 | LMFA07040001 | 11-undecanolactone                                                                                     |
| v2675 | 184.14633 | 271.8 | 3.666 | 1.89  | 8.141 | 0.000414 | 0.042781 | LMFA07040030 | 4-Undecanolide                                                                                         |
| v5278 | 292.20385 | 24.6  | 0     | 0     | 0.01  | 7.90E-05 | 0.015103 | LMFA10000002 | 9-1E3Z6Z-trien-1-yloxy-non-8E-enoic acid                                                               |
| v5278 | 292.20385 | 24.6  | 0     | 0     | 0.01  | 7.90E-05 | 0.015103 | LMFA10000003 | 12-(1E3Z-Hexadienyloxy)-9Z11E-dodecadienoic acid                                                       |
| v2675 | 184.14633 | 271.8 | 3.666 | 1.89  | 8.141 | 0.000414 | 0.042781 | LMPK09000018 | (2S6R8S)-28-Dimethyl-17-dioxaspiro55undecane                                                           |
| v2675 | 184.14633 | 271.8 | 3.666 | 1.89  | 8.141 | 0.000414 | 0.042781 | LMPK09000020 | 2-Ethyl-17-dioxaspiro55undecane                                                                        |
| v2675 | 184.14633 | 271.8 | 3.666 | 1.89  | 8.141 | 0.000414 | 0.042781 | LMPK09000021 | 2-Methyl-17-dioxaspiro56dodecane                                                                       |
| v2675 | 184.14633 | 271.8 | 3.666 | 1.89  | 8.141 | 0.000414 | 0.042781 | LMPK09000022 | 2-Ethyl-7-methyl-16-dioxaspiro45decane                                                                 |
| v2675 | 184.14633 | 271.8 | 3.666 | 1.89  | 8.141 | 0.000414 | 0.042781 | LMPK09000023 | 7-Ethyl-2R-methyl-16-dioxaspiro45decane                                                                |

|        |           |       |       |       |        |          |          |                |                                                                  |
|--------|-----------|-------|-------|-------|--------|----------|----------|----------------|------------------------------------------------------------------|
| v2675  | 184.14633 | 271.8 | 3.666 | 1.89  | 8.141  | 0.000414 | 0.042781 | LMPK09000024   | 27-Diethyl-16-dioxaspiro44nonane                                 |
| v2675  | 184.14633 | 271.8 | 3.666 | 1.89  | 8.141  | 0.000414 | 0.042781 | LMPK09000025   | (2S6S8S)-28-Dimethyl-17-dioxaspiro55undecane                     |
| v2675  | 184.14633 | 271.8 | 3.666 | 1.89  | 8.141  | 0.000414 | 0.042781 | LMPK09000026   | 2S-Ethyl-7-methyl-16-dioxaspiro45decane                          |
| v2675  | 184.14633 | 271.8 | 3.666 | 1.89  | 8.141  | 0.000414 | 0.042781 | LMPK09000027   | 27-Dimethyl-16-dioxaspiro46undecane                              |
| v2675  | 184.14633 | 271.8 | 3.666 | 1.89  | 8.141  | 0.000414 | 0.042781 | LMPK09000028   | 2-Methyl-7-propyl-16-dioxaspiro44nonane                          |
| v10702 | 653.17178 | 49.3  | 0.146 | 0.051 | 0.324  | 3.18E-05 | 0.014011 | LMPK12010152   | Cyanidin 3-(6-acetylglucoside)-5-glucoside                       |
| v10702 | 653.17178 | 49.3  | 0.146 | 0.051 | 0.324  | 3.18E-05 | 0.014011 | LMPK12010226   | Cyanidin 3-glucoside-5-(6-acetylglucoside)                       |
| v10702 | 653.17178 | 49.3  | 0.146 | 0.051 | 0.324  | 3.18E-05 | 0.014011 | LMPK12010321   | Delphinidin 3-6-(2-acetylramnosyl)glucoside                      |
| v10702 | 653.17178 | 49.3  | 0.146 | 0.051 | 0.324  | 3.18E-05 | 0.014011 | LMPK12010322   | Delphinidin 3-6-(3-acetylramnosyl)glucoside                      |
| v10677 | 650.22108 | 79.3  | 5.843 | 2.503 | 17.473 | 0.000297 | 0.034571 | LMPK12050358   | 5-Hydroxy-734-trimethoxy-8-methylisoflavone 5-O-neohesperidoside |
| v6519  | 350.00964 | 68    | 0.149 | 0.051 | 0.344  | 7.12E-05 | 0.01502  | LMPK12110431   | -                                                                |
| v2675  | 184.14633 | 271.8 | 3.666 | 1.89  | 8.141  | 0.000414 | 0.042781 | LMPR0102010014 | -                                                                |
| v6000  | 326.2821  | 25.5  | 4.275 | 2.164 | 10.106 | 0.000163 | 0.024299 | LMPR0104010016 | 371115-tetramethyl-2-oxohexadecanoic acid                        |
| v6212  | 336.23006 | 28.4  | 0.32  | 0.157 | 0.583  | 0.000536 | 0.04761  | LMPR0104130006 | (5beta8alpha9beta10alpha)-1617-dihydroxykauran-18-oic acid       |
| v6483  | 348.19368 | 29.3  | 0.278 | 0.138 | 0.502  | 7.74E-05 | 0.015103 | LMPR0104170007 | -                                                                |
| v6483  | 348.19368 | 29.3  | 0.278 | 0.138 | 0.502  | 7.74E-05 | 0.015103 | LMPR0104170015 | -                                                                |
| v6483  | 348.19368 | 29.3  | 0.278 | 0.138 | 0.502  | 7.74E-05 | 0.015103 | LMPR0104170017 | -                                                                |
| v6212  | 336.23006 | 28.4  | 0.32  | 0.157 | 0.583  | 0.000536 | 0.04761  | LMPR0104240003 | (-)-78:1011-diepoxy-4(16)-dolabellene-1718-diol                  |
| v6483  | 348.19368 | 29.3  | 0.278 | 0.138 | 0.502  | 7.74E-05 | 0.015103 | LMPR0104420001 | -                                                                |
| v4899  | 276.20893 | 25.1  | 0.075 | 0.015 | 0.229  | 0.000149 | 0.022851 | LMST02010042   | 3alpha-hydroxy-5alpha-estran-17-one                              |
| v4899  | 276.20893 | 25.1  | 0.075 | 0.015 | 0.229  | 0.000149 | 0.022851 | LMST02010050   | 19-Nor-5-androstenediol                                          |

Table S2. Putatively identified metabolites from the metabolome-wide association study of autism cases and controls using RPLC analytical platform. Both uniquely and multiply matched annotations are shown.

| mzid  | Monoisotopic |          | Odds ratio | OR       |           | p value  | q value | dbID   | Name                                                                                                                                                           |
|-------|--------------|----------|------------|----------|-----------|----------|---------|--------|----------------------------------------------------------------------------------------------------------------------------------------------------------------|
|       | Mass         | Time (s) |            | lower CI | higher CI |          |         |        |                                                                                                                                                                |
| v1277 | 298.2508     | 44.2     | 0.204      | 0.079    | 0.433     | 1.94E-04 | 0.032   | C00869 | 2-Oxo-octadecanoic acid;2-Oxostearate                                                                                                                          |
| v3536 | 272.1776     | 130.1    | 0.287      | 0.145    | 0.514     | 8.54E-05 | 0.023   | C00951 | Estradiol-17beta;Estradiol;beta-Estradiol                                                                                                                      |
| v3536 | 116.0837     | 130.1    | 0.052      | 0.011    | 0.159     | 9.46E-06 | 0.018   | C01585 | Hexanoic acid;Hexanoate;Hexylic acid;n-Caproic acid                                                                                                            |
| v3536 | 272.1776     | 130.1    | 0.287      | 0.145    | 0.514     | 8.54E-05 | 0.023   | C02537 | Estradiol-17alpha;17alpha-Estradiol                                                                                                                            |
| v3536 | 188.1412     | 130.1    | 0.247      | 0.106    | 0.493     | 3.04E-04 | 0.044   | C02774 | 10-Hydroxydecanoic acid;10-Hydroxydecanoate                                                                                                                    |
| v3536 | 116.0837     | 130.1    | 0.052      | 0.011    | 0.159     | 9.46E-06 | 0.018   | C02948 | 4-Hydroxyhexan-3-one;4-Hydroxy-3-hexanone;Propioin                                                                                                             |
| v3262 | 116.0837     | 202.1    | 0.052      | 0.011    | 0.159     | 9.46E-06 | 0.018   | C03739 | trans-12-Cyclohexanediol;trans-Cyclohexane-12-diol                                                                                                             |
| v3536 | 116.0837     | 130.1    | 0.052      | 0.011    | 0.159     | 9.46E-06 | 0.018   | C03739 | trans-12-Cyclohexanediol;trans-Cyclohexane-12-diol                                                                                                             |
| v283  | 312.2301     | 47.8     | 0.004      | 0        | 0.048     | 1.70E-04 | 0.030   | C04717 | (9Z11E)-(13S)-13-Hydroperoxyoctadeca-911-dienoic acid;(9Z11E)-(13S)-13-Hydroperoxyoctadeca-911-dienoate;13(S)-HPODE;13S-Hydroperoxy-9Z11E-octadecadienoic acid |
| v283  | 230.0579     | 47.8     | 0          | 0        | 0.002     | 1.10E-04 | 0.024   | C06356 | 246-Trihydroxybenzophenone;Phenyl(246-trihydroxyphenyl)-methanone                                                                                              |
| v283  | 312.2301     | 47.8     | 0.004      | 0        | 0.048     | 1.70E-04 | 0.030   | C07338 | (9Z12Z)-(11S)-11-Hydroperoxyoctadeca-912-dienoic acid;(9Z12Z)-(11S)-11-Hydroperoxyoctadeca-912-dienoate                                                        |
| v283  | 312.2301     | 47.8     | 0.004      | 0        | 0.048     | 1.70E-04 | 0.030   | C07354 | (7S8S)-DiHODE;(9Z12Z)-(7S8S)-Dihydroxyoctadeca-912-dienoic acid;(7S8S9Z12Z)-7S-Dihydroxyoctadeca-912-dienoate                                                  |
| v283  | 230.0579     | 47.8     | 0          | 0        | 0.002     | 1.10E-04 | 0.024   | C07718 | 2-Hydroxy-4-(1-oxo-13-dihydro-2H-inden-2-ylidene)-but-2-enoic acid                                                                                             |
| v283  | 230.0579     | 47.8     | 0          | 0        | 0.002     | 1.10E-04 | 0.024   | C07725 | 2-Hydroxy-4-(2-oxo-13-dihydro-2H-inden-1-ylidene)but-2-enoic acid                                                                                              |
| v283  | 410.1818     | 47.8     | 0.057      | 0.011    | 0.178     | 3.95E-05 | 0.018   | C08093 | Oseltamivir phosphate                                                                                                                                          |
| v1277 | 298.2508     | 44.2     | 0.204      | 0.079    | 0.433     | 1.94E-04 | 0.032   | C08365 | Ricinoleic acid;(9Z)-(12R)-Hydroxyoctadecenoic acid;12-Hydroxy-9-octadecenoic acid;12-Hydroxy-cis-9-octadecenoic acid                                          |
| v283  | 230.0579     | 47.8     | 0          | 0        | 0.002     | 1.10E-04 | 0.024   | C09049 | Visnagin                                                                                                                                                       |
| v3536 | 386.2305     | 130.1    | 0.252      | 0.114    | 0.478     | 1.27E-04 | 0.026   | C11990 | Oleandolide                                                                                                                                                    |
| v283  | 230.0579     | 47.8     | 0          | 0        | 0.002     | 1.10E-04 | 0.024   | C12085 | Bis-noryangonin                                                                                                                                                |
| v3262 | 116.0837     | 202.1    | 0.052      | 0.011    | 0.159     | 9.46E-06 | 0.018   | C12293 | Isoamyl formate                                                                                                                                                |
| v3262 | 116.0837     | 202.1    | 0.052      | 0.011    | 0.159     | 9.46E-06 | 0.018   | C12304 | Butyl acetate;n-Butyl acetate                                                                                                                                  |
| v2752 | 116.0837     | 188.2    | 0.052      | 0.011    | 0.159     | 9.46E-06 | 0.018   | C12313 | cis-12-Cyclohexanediol;cis-Cyclohexane-12-diol                                                                                                                 |
| v3942 | 263.0844     | 169.5    | 115.208    | 13.977   | 2191.49   | 1.90E-04 | 0.032   | C12798 | Tulobuterol hydrochloride                                                                                                                                      |
| v1277 | 298.2508     | 44.2     | 0.204      | 0.079    | 0.433     | 1.94E-04 | 0.032   | C13791 | (6R7S)-67-Epoxyoctadecanoic acid;6R7S-Epoxy-octadecanoic acid;6R7S-Epoxy-octadecanoate                                                                         |
| v283  | 274.2144     | 47.8     | 0.107      | 0.03     | 0.276     | 6.06E-05 | 0.019   | C13854 | 1-Dodecanoyl-sn-glycerol                                                                                                                                       |
| v283  | 198.1045     | 47.8     | 0.089      | 0.022    | 0.248     | 7.08E-05 | 0.020   | C14340 | 4-Phenethylphenol;4-(2-Phenylethyl)phenol                                                                                                                      |
| v3536 | 272.1776     | 130.1    | 0.287      | 0.145    | 0.514     | 8.54E-05 | 0.023   | C14500 | 19-Norandrostenedione;delta4-Estrene-317-dione                                                                                                                 |
| v3262 | 322.1780     | 202.1    | 0.242      | 0.106    | 0.478     | 1.85E-04 | 0.031   | C14752 | alpha-Zearalanol;Zeranol                                                                                                                                       |
| v3262 | 322.1780     | 202.1    | 0.242      | 0.106    | 0.478     | 1.85E-04 | 0.031   | C14753 | beta-Zearalanol;Taleranol                                                                                                                                      |
| v283  | 326.2093     | 47.8     | 0          | 0        | 0.002     | 3.94E-04 | 0.048   | C14794 | 23-Dinor-8-iso prostaglandin F2alpha;23-Dinor-8-iso PGF2alpha                                                                                                  |
| v283  | 312.2301     | 47.8     | 0.004      | 0        | 0.048     | 1.70E-04 | 0.030   | C14827 | 9(S)-HPODE;9(S)-HPOD;(10E12Z)-(9S)-9-Hydroperoxyoctadeca-1012-dienoic acid;(9S10E12Z)-9-Hydroperoxy-1012-octadecadienoate                                      |
| v283  | 312.2301     | 47.8     | 0.004      | 0        | 0.048     | 1.70E-04 | 0.030   | C14831 | 8(R)-HPODE;(9Z12Z)-(8R)-8-Hydroperoxyoctadeca-912-dienoic acid;(8R9Z12Z)-8-Hydroperoxyoctadeca-912-dienoate                                                    |
| v283  | 312.2301     | 47.8     | 0.004      | 0        | 0.048     | 1.70E-04 | 0.030   | C14832 | 1213-Epoxy-9-hydroxy-10-octadecenoate;12(R)13(S)-Epoxy-9(S)-hydroxy-10(E)-octadecenoic acid;(10E)-(9S12R13S)-1213-Epoxy-9-hydroxyoctadec-10-enoic acid         |
| v283  | 312.2301     | 47.8     | 0.004      | 0        | 0.048     | 1.70E-04 | 0.030   | C14834 | 910-Epoxy-13-hydroxy-11-octadecenoate;(11E)-910-Epoxyoctadecenoic acid                                                                                         |
| v283  | 312.2301     | 47.8     | 0.004      | 0        | 0.048     | 1.70E-04 | 0.030   | C14836 | 910-1213-Diepoxyoctadecanoate;910-1213-Diepoxyoctadecanoic acid                                                                                                |
| v3536 | 272.1776     | 130.1    | 0.287      | 0.145    | 0.514     | 8.54E-05 | 0.023   | C15129 | Estra-135(10)-triene-217beta-diol;2-Hydroxy-3-deoxyestradiol                                                                                                   |
| v3536 | 272.1776     | 130.1    | 0.287      | 0.145    | 0.514     | 8.54E-05 | 0.023   | C15261 | Estra-135(10)-triene-316beta-diol;16beta-Estradiol                                                                                                             |
| v283  | 230.0579     | 47.8     | 0          | 0        | 0.002     | 1.10E-04 | 0.024   | C16263 | 23-Dihydroxy-2-carboxybiiphenyl                                                                                                                                |
| v1277 | 216.0746     | 44.2     | 0.188      | 0.078    | 0.381     | 2.69E-05 | 0.018   | C17359 | 8-Hydroxyalanylclavam                                                                                                                                          |
| v3536 | 188.1412     | 130.1    | 0.247      | 0.106    | 0.493     | 3.04E-04 | 0.044   | C18067 | 6-Hydroxy-37-dimethyloctanoate                                                                                                                                 |

|       |          |       |         |       |         |          |       |           |                                                                           |
|-------|----------|-------|---------|-------|---------|----------|-------|-----------|---------------------------------------------------------------------------|
| v283  | 230.0579 | 47.8  | 0       | 0     | 0.002   | 1.10E-04 | 0.024 | C18216    | 4-Hydroxyphenyl-4-hydroxybenzoate                                         |
| v1277 | 298.2508 | 44.2  | 0.204   | 0.079 | 0.433   | 1.94E-04 | 0.032 | C19418    | cis-9:10-Epoxystearic acid                                                |
| v1277 | 298.2508 | 44.2  | 0.204   | 0.079 | 0.433   | 1.94E-04 | 0.032 | C19616    | 18-Hydroxyoleate                                                          |
| v283  | 312.2301 | 47.8  | 0.004   | 0     | 0.048   | 1.70E-04 | 0.030 | C19618    | Octadec-9-ene-118-dioic acid                                              |
| v3812 | 332.2563 | 75    | 0.294   | 0.145 | 0.531   | 1.64E-04 | 0.030 | C19621    | 9:10:18-Trihydroxystearate                                                |
| v283  | 312.2301 | 47.8  | 0.004   | 0     | 0.048   | 1.70E-04 | 0.030 | C19937    | (8E10R12Z)-10-Hydroperoxy-8:12-octadecadienoate                           |
| v283  | 312.2301 | 47.8  | 0.004   | 0     | 0.048   | 1.70E-04 | 0.030 | C20186    | 5S8R-DiHODE;(5S8R)-DiHODE;(5S8R9Z12Z)-5:8-Dihydroxyoctadeca-9:12-dienoate |
| v283  | 312.2301 | 47.8  | 0.004   | 0     | 0.048   | 1.70E-04 | 0.030 | C20703    | (8E10S12Z)-10-Hydroperoxyoctadeca-8:12-dienoate                           |
| v3536 | 272.1776 | 130.1 | 0.287   | 0.145 | 0.514   | 8.54E-05 | 0.023 | HMDB00151 | Estradiol                                                                 |
| v3536 | 272.1776 | 130.1 | 0.287   | 0.145 | 0.514   | 8.54E-05 | 0.023 | HMDB00429 | 17a-Estradiol                                                             |
| v2752 | 116.0837 | 188.2 | 0.052   | 0.011 | 0.159   | 9.46E-06 | 0.018 | HMDB00535 | Caproic acid                                                              |
| v2562 | 116.0837 | 22.2  | 0.052   | 0.011 | 0.159   | 9.46E-06 | 0.018 | HMDB00689 | Isocaproic acid                                                           |
| v2752 | 116.0837 | 188.2 | 0.052   | 0.011 | 0.159   | 9.46E-06 | 0.018 | HMDB00689 | Isocaproic acid                                                           |
| v3536 | 216.1362 | 130.1 | 0.02    | 0.002 | 0.105   | 4.36E-05 | 0.018 | HMDB00888 | Undecanedioic acid                                                        |
| v3536 | 188.1412 | 130.1 | 0.247   | 0.106 | 0.493   | 3.04E-04 | 0.044 | HMDB02203 | 3-Hydroxycapric acid                                                      |
| v283  | 312.2301 | 47.8  | 0.004   | 0     | 0.048   | 1.70E-04 | 0.030 | HMDB03871 | 13-L-Hydroperoxylinoleic acid                                             |
| v283  | 312.2301 | 47.8  | 0.004   | 0     | 0.048   | 1.70E-04 | 0.030 | HMDB04706 | 8(R)-Hydroperoxylinoleic acid                                             |
| v283  | 312.2301 | 47.8  | 0.004   | 0     | 0.048   | 1.70E-04 | 0.030 | HMDB06940 | 9(S)-HPODE                                                                |
| v283  | 312.2301 | 47.8  | 0.004   | 0     | 0.048   | 1.70E-04 | 0.030 | HMDB10201 | 12:13-DiHODE                                                              |
| v283  | 312.2301 | 47.8  | 0.004   | 0     | 0.048   | 1.70E-04 | 0.030 | HMDB10208 | 15:16-DiHODE                                                              |
| v283  | 312.2301 | 47.8  | 0.004   | 0     | 0.048   | 1.70E-04 | 0.030 | HMDB10221 | 9:10-DiHODE                                                               |
| v3262 | 188.1412 | 202.1 | 0.247   | 0.106 | 0.493   | 3.04E-04 | 0.044 | HMDB10725 | (R)-3-Hydroxydecanoic acid                                                |
| v1277 | 298.2508 | 44.2  | 0.204   | 0.079 | 0.433   | 1.94E-04 | 0.032 | HMDB10736 | 3-Oxoctadecanoic acid                                                     |
| v6340 | 262.0801 | 167.5 | 919.538 | 61.53 | 57168.7 | 5.70E-05 | 0.018 | HMDB11164 | L-beta-aspartyl-L-glutamic acid                                           |
| v1277 | 217.0773 | 44.2  | 0.167   | 0.064 | 0.355   | 3.15E-05 | 0.018 | HMDB15328 | Captopril                                                                 |
| v1943 | 116.0837 | 35.1  | 0.052   | 0.011 | 0.159   | 9.46E-06 | 0.018 | HMDB29762 | Methyl (S)-2-Methylbutanoate                                              |
| v1943 | 116.0837 | 35.1  | 0.052   | 0.011 | 0.159   | 9.46E-06 | 0.018 | HMDB30027 | Methyl 3-methylbutanoate                                                  |
| v1943 | 116.0837 | 35.1  | 0.052   | 0.011 | 0.159   | 9.46E-06 | 0.018 | HMDB30056 | Isopropyl propionate                                                      |
| v1412 | 116.0837 | 182.5 | 0.052   | 0.011 | 0.159   | 9.46E-06 | 0.018 | HMDB30059 | Propyl propionate                                                         |
| v1943 | 116.0837 | 35.1  | 0.052   | 0.011 | 0.159   | 9.46E-06 | 0.018 | HMDB30059 | Propyl propionate                                                         |
| v6340 | 262.0801 | 167.5 | 919.538 | 61.53 | 57168.7 | 5.70E-05 | 0.018 | HMDB30413 | Na-L-Glutamyl-L-aspartic acid                                             |
| v4171 | 262.0801 | 201.3 | 919.538 | 61.53 | 57168.7 | 5.70E-05 | 0.018 | HMDB30419 | Ng-L-Glutamyl-L-aspartic acid                                             |
| v3812 | 332.2563 | 75    | 0.294   | 0.145 | 0.531   | 1.64E-04 | 0.030 | HMDB30935 | 9:10:13-Trihydroxystearic acid                                            |
| v1277 | 298.2508 | 44.2  | 0.204   | 0.079 | 0.433   | 1.94E-04 | 0.032 | HMDB30979 | 9-Oxoctadecanoic acid                                                     |
| v1277 | 298.2508 | 44.2  | 0.204   | 0.079 | 0.433   | 1.94E-04 | 0.032 | HMDB30980 | 10-Oxoctadecanoic acid                                                    |
| v1277 | 298.2508 | 44.2  | 0.204   | 0.079 | 0.433   | 1.94E-04 | 0.032 | HMDB30981 | 11-Oxoctadecanoic acid                                                    |
| v1277 | 298.2508 | 44.2  | 0.204   | 0.079 | 0.433   | 1.94E-04 | 0.032 | HMDB31127 | 5-Hexyltetrahydro-2-furanocanoic acid                                     |
| v1277 | 116.0837 | 44.2  | 0.052   | 0.011 | 0.159   | 9.46E-06 | 0.018 | HMDB31207 | Methyl pentanoate                                                         |
| v1412 | 116.0837 | 182.5 | 0.052   | 0.011 | 0.159   | 9.46E-06 | 0.018 | HMDB31207 | Methyl pentanoate                                                         |
| v283  | 116.0837 | 47.8  | 0.052   | 0.011 | 0.159   | 9.46E-06 | 0.018 | HMDB31221 | 2-Ethylbutanoic acid                                                      |
| v1277 | 116.0837 | 44.2  | 0.052   | 0.011 | 0.159   | 9.46E-06 | 0.018 | HMDB31221 | 2-Ethylbutanoic acid                                                      |
| v283  | 116.0837 | 47.8  | 0.052   | 0.011 | 0.159   | 9.46E-06 | 0.018 | HMDB31246 | 2-Methylpropyl acetate                                                    |
| v283  | 116.0837 | 47.8  | 0.052   | 0.011 | 0.159   | 9.46E-06 | 0.018 | HMDB31248 | Ethyl 2-methylpropanoate                                                  |
| v283  | 116.0837 | 47.8  | 0.052   | 0.011 | 0.159   | 9.46E-06 | 0.018 | HMDB31325 | n-Butyl acetate                                                           |
| v283  | 116.0837 | 47.8  | 0.052   | 0.011 | 0.159   | 9.46E-06 | 0.018 | HMDB31511 | Diacetone alcohol                                                         |
| v283  | 116.0837 | 47.8  | 0.052   | 0.011 | 0.159   | 9.46E-06 | 0.018 | HMDB31580 | (-)-2-Methylpentanoic acid                                                |
| v1708 | 326.2093 | 27.3  | 0       | 0     | 0.002   | 3.94E-04 | 0.048 | HMDB31963 | (3b6b8a12a)-8:12-Epoxy-7(11)-eremophilene-6:8:12-trimethoxy-3-ol          |
| v283  | 198.1045 | 47.8  | 0.089   | 0.022 | 0.248   | 7.08E-05 | 0.020 | HMDB32078 | Dibenzyl ether                                                            |
| v3262 | 269.1991 | 202.1 | 0.208   | 0.09  | 0.401   | 2.19E-05 | 0.018 | HMDB32255 | N-(Ethoxycarbonylmethyl)-p-menthane-3-carboxamide                         |
| v3262 | 322.1780 | 202.1 | 0.242   | 0.106 | 0.478   | 1.85E-04 | 0.031 | HMDB32702 | Zeranol                                                                   |
| v3262 | 188.1412 | 202.1 | 0.247   | 0.106 | 0.493   | 3.04E-04 | 0.044 | HMDB33201 | 9-Hydroxydecanoic acid                                                    |
| v3812 | 230.0579 | 75    | 0       | 0     | 0.002   | 1.10E-04 | 0.024 | HMDB33329 | Coriandrin                                                                |



|       |          |       |         |        |         |          |       |              |                                               |
|-------|----------|-------|---------|--------|---------|----------|-------|--------------|-----------------------------------------------|
| v3262 | 188.1412 | 202.1 | 0.247   | 0.106  | 0.493   | 3.04E-04 | 0.044 | HMDB33574    | (1R2R4R8R)-p-Menthane-289-triol               |
| v3262 | 188.1412 | 202.1 | 0.247   | 0.106  | 0.493   | 3.04E-04 | 0.044 | HMDB33640    | 7-Methyl-3-methylene-167-octanetriol          |
| v5612 | 116.0837 | 77.5  | 0.052   | 0.011  | 0.159   | 9.46E-06 | 0.018 | HMDB33774    | 3-Methylpentanoic acid                        |
| v283  | 116.0837 | 47.8  | 0.052   | 0.011  | 0.159   | 9.46E-06 | 0.018 | HMDB33774    | 3-Methylpentanoic acid                        |
| v3942 | 116.0837 | 169.5 | 0.052   | 0.011  | 0.159   | 9.46E-06 | 0.018 | HMDB33889    | Ethyl butyrate                                |
| v5109 | 116.0837 | 41.6  | 0.052   | 0.011  | 0.159   | 9.46E-06 | 0.018 | HMDB33889    | Ethyl butyrate                                |
| v1277 | 298.2508 | 44.2  | 0.204   | 0.079  | 0.433   | 1.94E-04 | 0.032 | HMDB34074    | 5-Oxooctadecanoic acid                        |
| v2790 | 116.0837 | 88.3  | 0.052   | 0.011  | 0.159   | 9.46E-06 | 0.018 | HMDB34163    | 3-Methylbutyl formate                         |
| v3812 | 116.0837 | 75    | 0.052   | 0.011  | 0.159   | 9.46E-06 | 0.018 | HMDB34163    | 3-Methylbutyl formate                         |
| v3812 | 332.2563 | 75    | 0.294   | 0.145  | 0.531   | 1.64E-04 | 0.030 | HMDB34295    | Floionolic acid                               |
| v1277 | 298.2508 | 44.2  | 0.204   | 0.079  | 0.433   | 1.94E-04 | 0.032 | HMDB34297    | Ricinoleic acid                               |
| v3262 | 188.1412 | 202.1 | 0.247   | 0.106  | 0.493   | 3.04E-04 | 0.044 | HMDB34783    | cis-p-Menthane-178-triol                      |
| v3536 | 216.1362 | 130.1 | 0.02    | 0.002  | 0.105   | 4.36E-05 | 0.018 | HMDB37137    | Butyl butyryllactate                          |
| v3536 | 272.1776 | 130.1 | 0.287   | 0.145  | 0.514   | 8.54E-05 | 0.023 | HMDB37216    | Linalyl phenylacetate                         |
| v5612 | 116.0837 | 77.5  | 0.052   | 0.011  | 0.159   | 9.46E-06 | 0.018 | HMDB37266    | 224-Trimethyl-13-dioxolane                    |
| v1697 | 116.0837 | 26.5  | 0.052   | 0.011  | 0.159   | 9.46E-06 | 0.018 | HMDB37266    | 224-Trimethyl-13-dioxolane                    |
| v3262 | 188.1412 | 202.1 | 0.247   | 0.106  | 0.493   | 3.04E-04 | 0.044 | HMDB38186    | 26-Dimethyl-7-octene-236-triol                |
| v3536 | 272.1776 | 130.1 | 0.287   | 0.145  | 0.514   | 8.54E-05 | 0.023 | HMDB38257    | Geranyl phenylacetate                         |
| v3744 | 230.0579 | 62.9  | 0       | 0      | 0.002   | 1.10E-04 | 0.024 | HMDB39141    | Wyeronic acid                                 |
| v2679 | 230.0579 | 61.8  | 0       | 0      | 0.002   | 1.10E-04 | 0.024 | HMDB39209    | 24-Dihydroxy-2-biphenylcarboxylic acid        |
| v3262 | 188.1412 | 202.1 | 0.247   | 0.106  | 0.493   | 3.04E-04 | 0.044 | HMDB39470    | (1S2S4R8R)-p-Menthane-129-triol               |
| v3262 | 188.1412 | 202.1 | 0.247   | 0.106  | 0.493   | 3.04E-04 | 0.044 | HMDB39668    | 2-Hexyl-13-dioxan-5-ol                        |
| v3262 | 188.1412 | 202.1 | 0.247   | 0.106  | 0.493   | 3.04E-04 | 0.044 | HMDB39669    | 2-Hexyl-13-dioxolane-4-methanol               |
| v3262 | 188.1412 | 202.1 | 0.247   | 0.106  | 0.493   | 3.04E-04 | 0.044 | HMDB39893    | (1R2R4S)-p-Menthane-128-triol                 |
| v3942 | 116.0837 | 169.5 | 0.052   | 0.011  | 0.159   | 9.46E-06 | 0.018 | HMDB40279    | 245-Trimethyl-13-dioxolane                    |
| v3536 | 116.0837 | 130.1 | 0.052   | 0.011  | 0.159   | 9.46E-06 | 0.018 | HMDB40327    | Pentyl formate                                |
| v3262 | 188.1412 | 202.1 | 0.247   | 0.106  | 0.493   | 3.04E-04 | 0.044 | HMDB40329    | xi-5-Hydroxydecanoic acid                     |
| v283  | 312.2301 | 47.8  | 0.004   | 0      | 0.048   | 1.70E-04 | 0.030 | HMDB40900    | (-)(E)-13-Hydroxy-10-oxo-11-octadecenoic acid |
| v3262 | 188.1412 | 202.1 | 0.247   | 0.106  | 0.493   | 3.04E-04 | 0.044 | HMDB41600    | Ethyl (-)-3-hydroxyoctanoate                  |
| v283  | 410.1842 | 47.8  | 0.057   | 0.011  | 0.178   | 3.95E-05 | 0.018 | HMDB42005    | Quinaprilat                                   |
| v3942 | 263.0844 | 169.5 | 115.208 | 13.977 | 2191.49 | 1.90E-04 | 0.032 | HMDB42056    | Tulobuterol                                   |
| v283  | 116.0837 | 47.8  | 0.052   | 0.011  | 0.159   | 9.46E-06 | 0.018 | LMFA01010006 | Hexanoic acid                                 |
| v283  | 116.0837 | 47.8  | 0.052   | 0.011  | 0.159   | 9.46E-06 | 0.018 | LMFA01020074 | 2-methyl-pentanoic acid                       |
| v283  | 116.0837 | 47.8  | 0.052   | 0.011  | 0.159   | 9.46E-06 | 0.018 | LMFA01020075 | 3-methyl-pentanoic acid                       |
| v283  | 116.0837 | 47.8  | 0.052   | 0.011  | 0.159   | 9.46E-06 | 0.018 | LMFA01020076 | 4-methyl-pentanoic acid                       |
| v283  | 116.0837 | 47.8  | 0.052   | 0.011  | 0.159   | 9.46E-06 | 0.018 | LMFA01020077 | 2-ethyl-butanoic acid                         |
| v283  | 116.0837 | 47.8  | 0.052   | 0.011  | 0.159   | 9.46E-06 | 0.018 | LMFA01020078 | 22-dimethyl-butanoic acid                     |
| v283  | 116.0837 | 47.8  | 0.052   | 0.011  | 0.159   | 9.46E-06 | 0.018 | LMFA01020079 | 33-dimethyl-butanoic acid                     |
| v3812 | 272.1776 | 75    | 0.287   | 0.145  | 0.514   | 8.54E-05 | 0.023 | LMFA01030510 | 13Z17-Octadecadiene-911-diyonic acid          |
| v3536 | 272.1776 | 130.1 | 0.287   | 0.145  | 0.514   | 8.54E-05 | 0.023 | LMFA01030553 | 5811-octadecatriynoic acid                    |
| v3536 | 272.1776 | 130.1 | 0.287   | 0.145  | 0.514   | 8.54E-05 | 0.023 | LMFA01030554 | 6912-octadecatriynoic acid                    |
| v3536 | 272.1776 | 130.1 | 0.287   | 0.145  | 0.514   | 8.54E-05 | 0.023 | LMFA01030555 | 81114-octadecatriynoic acid                   |
| v3536 | 188.1412 | 130.1 | 0.247   | 0.106  | 0.493   | 3.04E-04 | 0.044 | LMFA01050029 | 2-hydroxy-decanoic acid                       |
| v3536 | 188.1412 | 130.1 | 0.247   | 0.106  | 0.493   | 3.04E-04 | 0.044 | LMFA01050031 | 4-hydroxy-decanoic acid                       |
| v3536 | 188.1412 | 130.1 | 0.247   | 0.106  | 0.493   | 3.04E-04 | 0.044 | LMFA01050032 | 5-hydroxy-decanoic acid                       |
| v3536 | 188.1412 | 130.1 | 0.247   | 0.106  | 0.493   | 3.04E-04 | 0.044 | LMFA01050033 | 10-hydroxy-decanoic acid                      |
| v1277 | 274.2144 | 44.2  | 0.107   | 0.03   | 0.276   | 6.06E-05 | 0.019 | LMFA01050082 | 215-dihydroxy-pentadecanoic acid              |
| v3536 | 188.1412 | 130.1 | 0.247   | 0.106  | 0.493   | 3.04E-04 | 0.044 | LMFA01050153 | 3-hydroxy-decanoic acid                       |
| v3536 | 188.1412 | 130.1 | 0.247   | 0.106  | 0.493   | 3.04E-04 | 0.044 | LMFA01050154 | 6-hydroxy-decanoic acid                       |
| v3536 | 188.1412 | 130.1 | 0.247   | 0.106  | 0.493   | 3.04E-04 | 0.044 | LMFA01050155 | 7-hydroxy-decanoic acid                       |
| v3536 | 188.1412 | 130.1 | 0.247   | 0.106  | 0.493   | 3.04E-04 | 0.044 | LMFA01050156 | 9-hydroxy-decanoic acid                       |
| v283  | 274.2144 | 47.8  | 0.107   | 0.03   | 0.276   | 6.06E-05 | 0.019 | LMFA01050184 | 312-dihydroxy-pentadecanoic acid              |

|       |          |       |       |       |       |          |       |              |                                                  |
|-------|----------|-------|-------|-------|-------|----------|-------|--------------|--------------------------------------------------|
| v283  | 274.2144 | 47.8  | 0.107 | 0.03  | 0.276 | 6.06E-05 | 0.019 | LMFA01050186 | 412-dihydroxy-pentadecanoic acid                 |
| v3536 | 188.1412 | 130.1 | 0.247 | 0.106 | 0.493 | 3.04E-04 | 0.044 | LMFA01050244 | 2S-hydroxy-decanoic acid                         |
| v3536 | 188.1412 | 130.1 | 0.247 | 0.106 | 0.493 | 3.04E-04 | 0.044 | LMFA01050245 | 3R-hydroxy-decanoic acid                         |
| v3536 | 188.1412 | 130.1 | 0.247 | 0.106 | 0.493 | 3.04E-04 | 0.044 | LMFA01050246 | 3S-hydroxy-decanoic acid                         |
| v3536 | 188.1412 | 130.1 | 0.247 | 0.106 | 0.493 | 3.04E-04 | 0.044 | LMFA01050247 | 9R-hydroxy-decanoic acid                         |
| v3536 | 188.1412 | 130.1 | 0.247 | 0.106 | 0.493 | 3.04E-04 | 0.044 | LMFA01050248 | 9S-hydroxy-decanoic acid                         |
| v3536 | 188.1412 | 130.1 | 0.247 | 0.106 | 0.493 | 3.04E-04 | 0.044 | LMFA01050370 | 6-hydroxy-37-dimethyloctanoic acid               |
| v3262 | 298.2508 | 202.1 | 0.204 | 0.079 | 0.433 | 1.94E-04 | 0.032 | LMFA01050421 | 8Z-decen-46-diyonic acid                         |
| v3536 | 344.2563 | 130.1 | 0.016 | 0.002 | 0.09  | 3.50E-05 | 0.018 | LMFA01080006 | 1213-dihydroxy-11-methoxy-9-octadecenoic acid    |
| v3536 | 216.1362 | 130.1 | 0.02  | 0.002 | 0.105 | 4.36E-05 | 0.018 | LMFA01170007 | Undecanedioic acid                               |
| v3262 | 312.2301 | 202.1 | 0.004 | 0     | 0.048 | 1.70E-04 | 0.030 | LMFA01170055 | 9Z-Octadecenedioic acid                          |
| v3262 | 298.2508 | 202.1 | 0.204 | 0.079 | 0.433 | 1.94E-04 | 0.032 | LMFA02000001 | 9S10R-epoxy-octadecanoic acid                    |
| v3262 | 298.2508 | 202.1 | 0.204 | 0.079 | 0.433 | 1.94E-04 | 0.032 | LMFA02000002 | 9R10S-epoxy-octadecanoic acid                    |
| v3942 | 332.2563 | 169.5 | 0.294 | 0.145 | 0.531 | 1.64E-04 | 0.030 | LMFA02000005 | 18-hydroxy-9S10R-dihydroxy-octadecanoic acid     |
| v3812 | 332.2563 | 75    | 0.294 | 0.145 | 0.531 | 1.64E-04 | 0.030 | LMFA02000006 | 9R10S18-trihydroxy-octadecanoic acid             |
| v3262 | 312.2301 | 202.1 | 0.004 | 0     | 0.048 | 1.70E-04 | 0.030 | LMFA02000009 | 9-hydroxy-10-oxo-12Z-octadecenoic acid           |
| v3262 | 312.2301 | 202.1 | 0.004 | 0     | 0.048 | 1.70E-04 | 0.030 | LMFA02000010 | 10S11S-epoxy-9S-hydroxy-12Z-octadecenoic acid    |
| v3262 | 312.2301 | 202.1 | 0.004 | 0     | 0.048 | 1.70E-04 | 0.030 | LMFA02000012 | 9S-hydroperoxy-10E12Z-octadecadienoic acid       |
| v3262 | 312.2301 | 202.1 | 0.004 | 0     | 0.048 | 1.70E-04 | 0.030 | LMFA02000013 | 12R13S-epoxy-9S-hydroxy-10E-octadecenoic acid    |
| v3262 | 312.2301 | 202.1 | 0.004 | 0     | 0.048 | 1.70E-04 | 0.030 | LMFA02000017 | 12-oxo13-hydroxy-9Z-octadecenoic acid            |
| v283  | 326.2093 | 47.8  | 0     | 0     | 0.002 | 3.94E-04 | 0.048 | LMFA02000031 | 2R-hydroperoxy-9Z12Z15Z-octadecatrienoic acid    |
| v3262 | 312.2301 | 202.1 | 0.004 | 0     | 0.048 | 1.70E-04 | 0.030 | LMFA02000034 | 13S-hydroperoxy-9Z11E-octadecadienoic acid       |
| v2752 | 312.2301 | 188.2 | 0.004 | 0     | 0.048 | 1.70E-04 | 0.030 | LMFA02000045 | (-)-910-dihydroxy-12Z15Z-octadecadienoic acid    |
| v2752 | 312.2301 | 188.2 | 0.004 | 0     | 0.048 | 1.70E-04 | 0.030 | LMFA02000046 | (-)-1213-dihydroxy-9Z15Z-octadecadienoic acid    |
| v2752 | 312.2301 | 188.2 | 0.004 | 0     | 0.048 | 1.70E-04 | 0.030 | LMFA02000047 | (-)-1516-dihydroxy-9Z12Z-octadecadienoic acid    |
| v2752 | 312.2301 | 188.2 | 0.004 | 0     | 0.048 | 1.70E-04 | 0.030 | LMFA02000048 | (-)-67-dihydroxy-9Z12Z-octadecadienoic acid      |
| v2562 | 312.2301 | 22.2  | 0.004 | 0     | 0.048 | 1.70E-04 | 0.030 | LMFA02000049 | (-)-910-dihydroxy-6Z12Z-octadecadienoic acid     |
| v2554 | 312.2301 | 30.5  | 0.004 | 0     | 0.048 | 1.70E-04 | 0.030 | LMFA02000050 | (-)-1213-dihydroxy-6Z9Z-octadecadienoic acid     |
| v3262 | 298.2508 | 202.1 | 0.204 | 0.079 | 0.433 | 1.94E-04 | 0.032 | LMFA02000056 | 2R-hydroxy-9Z-octadecenoic acid                  |
| v283  | 326.2093 | 47.8  | 0     | 0     | 0.002 | 3.94E-04 | 0.048 | LMFA02000058 | 9-oxo-1213-dihydroxy-10E15Z-octadecadienoic acid |
| v2554 | 312.2301 | 30.5  | 0.004 | 0     | 0.048 | 1.70E-04 | 0.030 | LMFA02000064 | 8R11S-dihydroxy-9Z12Z-octadecadienoic acid       |
| v3262 | 298.2508 | 202.1 | 0.204 | 0.079 | 0.433 | 1.94E-04 | 0.032 | LMFA02000083 | 10R-hydroxy11Z-octadecenoic acid                 |
| v3262 | 298.2508 | 202.1 | 0.204 | 0.079 | 0.433 | 1.94E-04 | 0.032 | LMFA02000084 | 10S-hydroxy11Z-octadecenoic acid                 |
| v3262 | 298.2508 | 202.1 | 0.204 | 0.079 | 0.433 | 1.94E-04 | 0.032 | LMFA02000085 | 12R-hydroxy13Z-octadecenoic acid                 |
| v3262 | 298.2508 | 202.1 | 0.204 | 0.079 | 0.433 | 1.94E-04 | 0.032 | LMFA02000086 | 12S-hydroxy13Z-octadecenoic acid                 |
| v3262 | 298.2508 | 202.1 | 0.204 | 0.079 | 0.433 | 1.94E-04 | 0.032 | LMFA02000087 | 11R-hydroxy12Z-octadecenoic acid                 |
| v3262 | 298.2508 | 202.1 | 0.204 | 0.079 | 0.433 | 1.94E-04 | 0.032 | LMFA02000088 | 11S-hydroxy12Z-octadecenoic acid                 |
| v3262 | 298.2508 | 202.1 | 0.204 | 0.079 | 0.433 | 1.94E-04 | 0.032 | LMFA02000089 | 12R-hydroxy10E-octadecenoic acid                 |
| v3262 | 298.2508 | 202.1 | 0.204 | 0.079 | 0.433 | 1.94E-04 | 0.032 | LMFA02000090 | 12S-hydroxy10E-octadecenoic acid                 |
| v3262 | 298.2508 | 202.1 | 0.204 | 0.079 | 0.433 | 1.94E-04 | 0.032 | LMFA02000091 | 12R-hydroxy13E-octadecenoic acid                 |
| v3262 | 298.2508 | 202.1 | 0.204 | 0.079 | 0.433 | 1.94E-04 | 0.032 | LMFA02000092 | 12S-hydroxy13E-octadecenoic acid                 |
| v3262 | 298.2508 | 202.1 | 0.204 | 0.079 | 0.433 | 1.94E-04 | 0.032 | LMFA02000093 | 13R-hydroxy11E-octadecenoic acid                 |
| v3262 | 298.2508 | 202.1 | 0.204 | 0.079 | 0.433 | 1.94E-04 | 0.032 | LMFA02000094 | 13S-hydroxy11E-octadecenoic acid                 |
| v3262 | 298.2508 | 202.1 | 0.204 | 0.079 | 0.433 | 1.94E-04 | 0.032 | LMFA02000095 | 11R-hydroxy12E-octadecenoic acid                 |
| v3262 | 298.2508 | 202.1 | 0.204 | 0.079 | 0.433 | 1.94E-04 | 0.032 | LMFA02000096 | 11S-hydroxy12E-octadecenoic acid                 |
| v3262 | 298.2508 | 202.1 | 0.204 | 0.079 | 0.433 | 1.94E-04 | 0.032 | LMFA02000098 | 13-hydroperoxy-14E-octadecenoic acid             |
| v2554 | 312.2301 | 30.5  | 0.004 | 0     | 0.048 | 1.70E-04 | 0.030 | LMFA02000099 | 9-hydroperoxy-9E11E-octadecadienoic acid         |
| v1943 | 312.2301 | 35.1  | 0.004 | 0     | 0.048 | 1.70E-04 | 0.030 | LMFA02000100 | 9-hydroperoxy-10E12E-octadecadienoic acid        |
| v1943 | 312.2301 | 35.1  | 0.004 | 0     | 0.048 | 1.70E-04 | 0.030 | LMFA02000101 | 10-hydroperoxy-8E12Z-octadecadienoic acid        |
| v1943 | 312.2301 | 35.1  | 0.004 | 0     | 0.048 | 1.70E-04 | 0.030 | LMFA02000102 | 12-hydroperoxy-9Z13E-octadecadienoic acid        |
| v1699 | 312.2301 | 62.3  | 0.004 | 0     | 0.048 | 1.70E-04 | 0.030 | LMFA02000103 | 8-hydroperoxy-912-octadecadienoic acid           |
| v1699 | 312.2301 | 62.3  | 0.004 | 0     | 0.048 | 1.70E-04 | 0.030 | LMFA02000104 | 14-hydroperoxy-912-octadecadienoic acid          |

|       |          |       |       |       |       |          |       |              |                                            |
|-------|----------|-------|-------|-------|-------|----------|-------|--------------|--------------------------------------------|
| v1412 | 312.2301 | 182.5 | 0.004 | 0     | 0.048 | 1.70E-04 | 0.030 | LMFA02000113 | 8R-hydroperoxy-9Z12Z-octadecadienoic acid  |
| v1412 | 312.2301 | 182.5 | 0.004 | 0     | 0.048 | 1.70E-04 | 0.030 | LMFA02000115 | 11S-hydroperoxy-9Z12Z-octadecadienoic acid |
| v3812 | 332.2563 | 75    | 0.294 | 0.145 | 0.531 | 1.64E-04 | 0.030 | LMFA02000147 | 91018-trihydroxy-octadecanoic acid         |
| v3262 | 298.2508 | 202.1 | 0.204 | 0.079 | 0.433 | 1.94E-04 | 0.032 | LMFA02000149 | 9-hydroxy-12Z-octadecenoic acid            |
| v3262 | 298.2508 | 202.1 | 0.204 | 0.079 | 0.433 | 1.94E-04 | 0.032 | LMFA02000150 | 12-hydroxy-9E-octadecenoic acid            |
| v1277 | 312.2301 | 44.2  | 0.004 | 0     | 0.048 | 1.70E-04 | 0.030 | LMFA02000158 | 9-hydroxy-1213-epoxy-10-octadecenoic acid  |
| v1277 | 312.2301 | 44.2  | 0.004 | 0     | 0.048 | 1.70E-04 | 0.030 | LMFA02000159 | 1213-epoxy-11-hydroxy-9-octadecenoic acid  |
| v1277 | 312.2301 | 44.2  | 0.004 | 0     | 0.048 | 1.70E-04 | 0.030 | LMFA02000166 | 813-dihydroxy-911-octadecadienoic acid     |
| v1277 | 312.2301 | 44.2  | 0.004 | 0     | 0.048 | 1.70E-04 | 0.030 | LMFA02000167 | 914-dihydroxy-1012-octadecadienoic acid    |
| v1277 | 312.2301 | 44.2  | 0.004 | 0     | 0.048 | 1.70E-04 | 0.030 | LMFA02000170 | 9-hydroxy-10-oxo-12-octadecenoic acid      |
| v1277 | 312.2301 | 44.2  | 0.004 | 0     | 0.048 | 1.70E-04 | 0.030 | LMFA02000171 | 9-hydroxy-12-oxo-10-octadecenoic acid      |
| v1277 | 312.2301 | 44.2  | 0.004 | 0     | 0.048 | 1.70E-04 | 0.030 | LMFA02000172 | 9-hydroxy-13-oxo-10-octadecenoic acid      |
| v3262 | 298.2508 | 202.1 | 0.204 | 0.079 | 0.433 | 1.94E-04 | 0.032 | LMFA02000177 | 12-hydroxy-10E-octadecenoic acid           |
| v3262 | 298.2508 | 202.1 | 0.204 | 0.079 | 0.433 | 1.94E-04 | 0.032 | LMFA02000178 | 9-hydroxy-10Z-octadecenoic acid            |
| v3262 | 298.2508 | 202.1 | 0.204 | 0.079 | 0.433 | 1.94E-04 | 0.032 | LMFA02000179 | 9-hydroxy-12-octadecenoic acid             |
| v3262 | 298.2508 | 202.1 | 0.204 | 0.079 | 0.433 | 1.94E-04 | 0.032 | LMFA02000180 | 17-hydroxy-9Z-octadecenoic acid            |
| v3262 | 298.2508 | 202.1 | 0.204 | 0.079 | 0.433 | 1.94E-04 | 0.032 | LMFA02000181 | 18-hydroxy-9Z-octadecenoic acid            |
| v3262 | 298.2508 | 202.1 | 0.204 | 0.079 | 0.433 | 1.94E-04 | 0.032 | LMFA02000184 | 12R-hydroxy-9Z-octadecenoic acid           |
| v3262 | 298.2508 | 202.1 | 0.204 | 0.079 | 0.433 | 1.94E-04 | 0.032 | LMFA02000202 | 5-hydroxy-2-octadecenoic acid              |
| v3262 | 298.2508 | 202.1 | 0.204 | 0.079 | 0.433 | 1.94E-04 | 0.032 | LMFA02000203 | 8-hydroxy-9-octadecenoic acid              |
| v3262 | 298.2508 | 202.1 | 0.204 | 0.079 | 0.433 | 1.94E-04 | 0.032 | LMFA02000204 | 8R-hydroxy-9Z-octadecenoic acid            |
| v3262 | 298.2508 | 202.1 | 0.204 | 0.079 | 0.433 | 1.94E-04 | 0.032 | LMFA02000205 | 9R-hydroxy-10E-octadecenoic acid           |
| v3262 | 298.2508 | 202.1 | 0.204 | 0.079 | 0.433 | 1.94E-04 | 0.032 | LMFA02000206 | 9-hydroxy-10E-octadecenoic acid            |
| v3262 | 298.2508 | 202.1 | 0.204 | 0.079 | 0.433 | 1.94E-04 | 0.032 | LMFA02000207 | 9R-hydroxy-12E-octadecenoic acid           |
| v3262 | 298.2508 | 202.1 | 0.204 | 0.079 | 0.433 | 1.94E-04 | 0.032 | LMFA02000208 | 9R-hydroxy-12Z-octadecenoic acid           |
| v3262 | 298.2508 | 202.1 | 0.204 | 0.079 | 0.433 | 1.94E-04 | 0.032 | LMFA02000209 | 10-hydroxy-8-octadecenoic acid             |
| v3262 | 298.2508 | 202.1 | 0.204 | 0.079 | 0.433 | 1.94E-04 | 0.032 | LMFA02000210 | 10R-hydroxy-8E-octadecenoic acid           |
| v3262 | 298.2508 | 202.1 | 0.204 | 0.079 | 0.433 | 1.94E-04 | 0.032 | LMFA02000211 | 11-hydroxy-9-octadecenoic acid             |
| v3262 | 298.2508 | 202.1 | 0.204 | 0.079 | 0.433 | 1.94E-04 | 0.032 | LMFA02000212 | 12R-hydroxy-9E-octadecenoic acid           |
| v3262 | 298.2508 | 202.1 | 0.204 | 0.079 | 0.433 | 1.94E-04 | 0.032 | LMFA02000213 | 12S-hydroxy-9E-octadecenoic acid           |
| v3262 | 298.2508 | 202.1 | 0.204 | 0.079 | 0.433 | 1.94E-04 | 0.032 | LMFA02000214 | 12S-hydroxy-9Z-octadecenoic acid           |
| v1277 | 312.2301 | 44.2  | 0.004 | 0     | 0.048 | 1.70E-04 | 0.030 | LMFA02000224 | 7S8S-dihydroxy-9Z12Z-octadecadienoic acid  |
| v3262 | 298.2508 | 202.1 | 0.204 | 0.079 | 0.433 | 1.94E-04 | 0.032 | LMFA02000240 | 3-oxo-octadecanoic acid                    |
| v3262 | 298.2508 | 202.1 | 0.204 | 0.079 | 0.433 | 1.94E-04 | 0.032 | LMFA02000241 | 4-oxo-octadecanoic acid                    |
| v3262 | 298.2508 | 202.1 | 0.204 | 0.079 | 0.433 | 1.94E-04 | 0.032 | LMFA02000242 | 5-oxo-octadecanoic acid                    |
| v2790 | 298.2508 | 88.3  | 0.204 | 0.079 | 0.433 | 1.94E-04 | 0.032 | LMFA02000243 | 6-oxo-octadecanoic acid                    |
| v2790 | 298.2508 | 88.3  | 0.204 | 0.079 | 0.433 | 1.94E-04 | 0.032 | LMFA02000244 | 7-oxo-octadecanoic acid                    |
| v2790 | 298.2508 | 88.3  | 0.204 | 0.079 | 0.433 | 1.94E-04 | 0.032 | LMFA02000245 | 9-oxo-octadecanoic acid                    |
| v2790 | 298.2508 | 88.3  | 0.204 | 0.079 | 0.433 | 1.94E-04 | 0.032 | LMFA02000246 | 10-oxo-octadecanoic acid                   |
| v1277 | 312.2301 | 44.2  | 0.004 | 0     | 0.048 | 1.70E-04 | 0.030 | LMFA02000248 | 9-oxo-13-hydroxy-11-octadecenoic acid      |
| v1277 | 312.2301 | 44.2  | 0.004 | 0     | 0.048 | 1.70E-04 | 0.030 | LMFA02000249 | 10-oxo-13-hydroxy-11-octadecenoic acid     |
| v1277 | 312.2301 | 44.2  | 0.004 | 0     | 0.048 | 1.70E-04 | 0.030 | LMFA02000250 | 12-oxo-13-hydroxy-9-octadecenoic acid      |
| v2752 | 298.2508 | 188.2 | 0.204 | 0.079 | 0.433 | 1.94E-04 | 0.032 | LMFA02000253 | 16-methyl-10-oxo-heptadecanoic acid        |
| v2752 | 298.2508 | 188.2 | 0.204 | 0.079 | 0.433 | 1.94E-04 | 0.032 | LMFA02000254 | 2-methyl-4-oxo-heptadecanoic acid          |
| v2752 | 298.2508 | 188.2 | 0.204 | 0.079 | 0.433 | 1.94E-04 | 0.032 | LMFA02000255 | 11-oxo-octadecanoic acid                   |
| v2752 | 298.2508 | 188.2 | 0.204 | 0.079 | 0.433 | 1.94E-04 | 0.032 | LMFA02000256 | 12-oxo-octadecanoic acid                   |
| v2752 | 298.2508 | 188.2 | 0.204 | 0.079 | 0.433 | 1.94E-04 | 0.032 | LMFA02000257 | 13-oxo-octadecanoic acid                   |
| v2752 | 298.2508 | 188.2 | 0.204 | 0.079 | 0.433 | 1.94E-04 | 0.032 | LMFA02000258 | 14-oxo-octadecanoic acid                   |
| v2752 | 298.2508 | 188.2 | 0.204 | 0.079 | 0.433 | 1.94E-04 | 0.032 | LMFA02000259 | 15-oxo-octadecanoic acid                   |
| v2752 | 298.2508 | 188.2 | 0.204 | 0.079 | 0.433 | 1.94E-04 | 0.032 | LMFA02000260 | 16-oxo-octadecanoic acid                   |
| v2752 | 298.2508 | 188.2 | 0.204 | 0.079 | 0.433 | 1.94E-04 | 0.032 | LMFA02000261 | 17-oxo-octadecanoic acid                   |
| v1699 | 298.2508 | 62.3  | 0.204 | 0.079 | 0.433 | 1.94E-04 | 0.032 | LMFA02000262 | 2-oxo-octadecanoic acid                    |

|       |          |       |       |       |       |          |       |              |                                                                  |
|-------|----------|-------|-------|-------|-------|----------|-------|--------------|------------------------------------------------------------------|
| v1699 | 298.2508 | 62.3  | 0.204 | 0.079 | 0.433 | 1.94E-04 | 0.032 | LMFA02000263 | 8-oxo-octadecanoic acid                                          |
| v1277 | 312.2301 | 44.2  | 0.004 | 0     | 0.048 | 1.70E-04 | 0.030 | LMFA02000264 | 910-dioxo-octadecanoic acid                                      |
| v1277 | 298.2508 | 44.2  | 0.204 | 0.079 | 0.433 | 1.94E-04 | 0.032 | LMFA02000275 | 6R7S-epoxy-octadecanoic acid                                     |
| v1277 | 312.2301 | 44.2  | 0.004 | 0     | 0.048 | 1.70E-04 | 0.030 | LMFA02000277 | 910-epoxy-11-hydroxy-12-octadecenoic acid                        |
| v283  | 312.2301 | 47.8  | 0.004 | 0     | 0.048 | 1.70E-04 | 0.030 | LMFA02000278 | 910-epoxy-13-hydroxy-11-octadecenoic acid                        |
| v283  | 312.2301 | 47.8  | 0.004 | 0     | 0.048 | 1.70E-04 | 0.030 | LMFA02000284 | 5S8R-dihydroxy-9Z12Z-octadecadienoic acid                        |
| v283  | 312.2301 | 47.8  | 0.004 | 0     | 0.048 | 1.70E-04 | 0.030 | LMFA02000285 | 10R-hydroperoxy-8E12Z-octadecadienoic acid                       |
| v283  | 312.2301 | 47.8  | 0.004 | 0     | 0.048 | 1.70E-04 | 0.030 | LMFA02000286 | 10S-hydroperoxy-8E12Z-octadecadienoic acid                       |
| v283  | 326.2093 | 47.8  | 0     | 0     | 0.002 | 3.94E-04 | 0.048 | LMFA03010011 | 9S11S15S-trihydroxy-23-dinor-5Z13E-prostadienoic acid            |
| v283  | 326.2093 | 47.8  | 0     | 0     | 0.002 | 3.94E-04 | 0.048 | LMFA03010169 | 9-oxo-11R15S-dihydroxy-23-dinor-13E-prostenoic acid              |
| v283  | 326.2093 | 47.8  | 0     | 0     | 0.002 | 3.94E-04 | 0.048 | LMFA03010212 | 23-dinor-9S11R15S-trihydroxy-5Z13E-prostadienoic acid            |
| v283  | 326.2093 | 47.8  | 0     | 0     | 0.002 | 3.94E-04 | 0.048 | LMFA03110010 | 9S11R15S-trihydroxy-23-dinor-5Z13E-prostadienoic acid-cyclo8S12R |
| v3536 | 188.1412 | 130.1 | 0.247 | 0.106 | 0.493 | 3.04E-04 | 0.044 | LMFA05000610 | 26-dimethyloct-7-ene-236-triol                                   |
| v3536 | 188.1412 | 130.1 | 0.247 | 0.106 | 0.493 | 3.04E-04 | 0.044 | LMFA05000635 | 7-methyl-3-methylideneoctane-167-triol                           |
| v3536 | 188.1412 | 130.1 | 0.247 | 0.106 | 0.493 | 3.04E-04 | 0.044 | LMFA05000657 | ethyl 3-hydroxyoctanoate                                         |
| v283  | 116.0837 | 47.8  | 0.052 | 0.011 | 0.159 | 9.46E-06 | 0.018 | LMFA06000012 | 2-hydroxy-hexanal                                                |
| v283  | 116.0837 | 47.8  | 0.052 | 0.011 | 0.159 | 9.46E-06 | 0.018 | LMFA06000013 | 4-hydroxy-hexanal                                                |
| v283  | 116.0837 | 47.8  | 0.052 | 0.011 | 0.159 | 9.46E-06 | 0.018 | LMFA06000014 | 5-hydroxy-hexanal                                                |
| v283  | 116.0837 | 47.8  | 0.052 | 0.011 | 0.159 | 9.46E-06 | 0.018 | LMFA06000015 | 6-hydroxy-hexanal                                                |
| v283  | 116.0837 | 47.8  | 0.052 | 0.011 | 0.159 | 9.46E-06 | 0.018 | LMFA06000125 | 3-Hydroxyhexanal                                                 |
| v283  | 116.0837 | 47.8  | 0.052 | 0.011 | 0.159 | 9.46E-06 | 0.018 | LMFA07010412 | propyl propionate                                                |
| v283  | 116.0837 | 47.8  | 0.052 | 0.011 | 0.159 | 9.46E-06 | 0.018 | LMFA07010503 | ethyl 2-methyl-propionyl                                         |
| v283  | 116.0837 | 47.8  | 0.052 | 0.011 | 0.159 | 9.46E-06 | 0.018 | LMFA07010575 | 3-Methyl-2-butenyl formate                                       |
| v3536 | 188.1412 | 130.1 | 0.247 | 0.106 | 0.493 | 3.04E-04 | 0.044 | LMFA07010583 | Hexyl (R)-3-hydroxybutyrate                                      |
| v3536 | 216.1362 | 130.1 | 0.02  | 0.002 | 0.105 | 4.36E-05 | 0.018 | LMFA07010792 | 1-butoxy-1-oxopropan-2-yl butanoate                              |
| v283  | 116.0837 | 47.8  | 0.052 | 0.011 | 0.159 | 9.46E-06 | 0.018 | LMFA07010874 | ethyl butanoate                                                  |
| v283  | 116.0837 | 47.8  | 0.052 | 0.011 | 0.159 | 9.46E-06 | 0.018 | LMFA07010934 | methyl 2-methylbutanoate                                         |
| v283  | 116.0837 | 47.8  | 0.052 | 0.011 | 0.159 | 9.46E-06 | 0.018 | LMFA07010950 | methyl 3-methylbutanoate                                         |
| v283  | 116.0837 | 47.8  | 0.052 | 0.011 | 0.159 | 9.46E-06 | 0.018 | LMFA07010966 | methyl pentanoate                                                |
| v283  | 116.0837 | 47.8  | 0.052 | 0.011 | 0.159 | 9.46E-06 | 0.018 | LMFA12000029 | 4-Hydroxyhexan-3-one                                             |
| v3744 | 116.0837 | 62.9  | 0.052 | 0.011 | 0.159 | 9.46E-06 | 0.018 | LMFA12000071 | 4-Hydroxy-4-methylpentan-2-one                                   |
| v1943 | 116.0837 | 35.1  | 0.052 | 0.011 | 0.159 | 9.46E-06 | 0.018 | LMFA12000071 | 4-Hydroxy-4-methylpentan-2-one                                   |
| v3536 | 116.0837 | 130.1 | 0.052 | 0.011 | 0.159 | 9.46E-06 | 0.018 | LMFA12000076 | 2S-Hydroxyhexan-3-one                                            |
| v3744 | 116.0837 | 62.9  | 0.052 | 0.011 | 0.159 | 9.46E-06 | 0.018 | LMFA12000076 | 2S-Hydroxyhexan-3-one                                            |
| v3536 | 116.0837 | 130.1 | 0.052 | 0.011 | 0.159 | 9.46E-06 | 0.018 | LMFA12000077 | 3R-Hydroxyhexan-2-one                                            |
| v3536 | 116.0837 | 130.1 | 0.052 | 0.011 | 0.159 | 9.46E-06 | 0.018 | LMFA12000078 | 3S-Hydroxyhexan-2-one                                            |
| v3536 | 116.0837 | 130.1 | 0.052 | 0.011 | 0.159 | 9.46E-06 | 0.018 | LMFA12000082 | 2-Hydroxyhexan-3-one                                             |
| v283  | 274.2144 | 47.8  | 0.107 | 0.03  | 0.276 | 6.06E-05 | 0.019 | LMGL01010008 | 1-dodecanoyl-sn-glycerol                                         |
| v1277 | 448.1733 | 44.2  | 0.165 | 0.051 | 0.388 | 3.60E-04 | 0.046 | LMPK12020272 | -                                                                |
| v1277 | 448.1733 | 44.2  | 0.165 | 0.051 | 0.388 | 3.60E-04 | 0.046 | LMPK12120352 | 23452346-Octamethoxychalcone                                     |
| v283  | 230.0579 | 47.8  | 0     | 0     | 0.002 | 1.10E-04 | 0.024 | LMPK13110003 | -                                                                |
| v3536 | 272.1776 | 130.1 | 0.287 | 0.145 | 0.514 | 8.54E-05 | 0.023 | LMST02010001 | estra-135(10)-triene-317beta-diol                                |
| v3536 | 272.1776 | 130.1 | 0.287 | 0.145 | 0.514 | 8.54E-05 | 0.023 | LMST02010012 | estra-579-triene-3beta17beta-diol                                |
| v3536 | 272.1776 | 130.1 | 0.287 | 0.145 | 0.514 | 8.54E-05 | 0.023 | LMST02010013 | 8alpha-estra-135(10)-trien-317beta-diol                          |
| v3536 | 272.1776 | 130.1 | 0.287 | 0.145 | 0.514 | 8.54E-05 | 0.023 | LMST02010017 | estra-579-triene-3alpha17alpha-diol                              |
| v3536 | 272.1776 | 130.1 | 0.287 | 0.145 | 0.514 | 8.54E-05 | 0.023 | LMST02010029 | estra-135(10)-triene-317alpha-diol                               |
